# Supplementary material for: Uncommon Polyketides from Penicillium steckii AS-324, a Marine Endozoic Fungus Isolated from Deep-Sea Coral in the Magellan Seamount
Source: MDPI journal article supplement (doi:10.3390/ijms23116332), 2022-06-06
Supplement: s1 [file s1]

## Supporting Information

### Uncommon Polyketides from *Penicillium steckii* AS-324, a Marine Endozoic Fungus Isolated from Deep-Sea Coral in the Magellan Seamount

Xue-Yi Hu <sup>1,2,3</sup>, Xiao-Ming Li <sup>1,3</sup>, Bin-Gui Wang <sup>1,2,3,4,\*</sup> and Ling-Hong Meng <sup>1,2,4,\*</sup>

<sup>1</sup> CAS and Shandong Province Key Laboratory of Experimental Marine Biology, Institute of Oceanology, Chinese Academy of Sciences, Nanhai Road 7, Qingdao 266071, China; xueyihu61@163.com (X.-Y.H.); lixmqd@qdio.ac.cn (X.-M.L.)

<sup>2</sup> Laboratory of Marine Biology and Biotechnology, Qingdao National Laboratory for Marine Science and Technology, Wenhai Road 1, Qingdao 266237, China

<sup>3</sup> College of Marine Science, University of Chinese Academy of Sciences, Yuquan Road 19A, Beijing 100049, China

<sup>4</sup> Center for Ocean Mega-Science, Chinese Academy of Sciences, Nanhai Road 7, Qingdao 266071, China

\* Correspondence: wangbg@ms.qdio.ac.cn (B.-G.W.); menglh@ms.qdio.ac.cn (L.-H.M.); Tel.: +86-532-8289-8553 (B.-G.W.); +86-532-8289-8890 (L.-H.M.)

## Content

**Figure S1.** HRESI mass spectrum of compound **1**;

**Figure S2.**  $^1\text{H}$  NMR (500 MHz,  $\text{DMSO-}d_6$ ) spectrum of compound **1**;

**Figure S3.**  $^{13}\text{C}$  NMR (125 MHz,  $\text{DMSO-}d_6$ ) and DEPT spectra of compound **1**;

**Figure S4.** COSY spectrum of compound **1**;

**Figure S5.** HSQC spectrum of compound **1**;

**Figure S6.** HMBC spectrum of compound **1**;

**Figure S7.** NOESY spectrum of compound **1**;

**Figure S8.** HRESI mass spectrum of compound **2**;

**Figure S9.**  $^1\text{H}$  NMR (500 MHz,  $\text{DMSO-}d_6$ ) spectrum of compound **2**;

**Figure S10.**  $^{13}\text{C}$  NMR (125 MHz,  $\text{DMSO-}d_6$ ) and DEPT spectra of compound **2**;

**Figure S11.** COSY spectrum of compound **2**;

**Figure S12.** HSQC spectrum of compound **2**;

**Figure S13.** HMBC spectrum of compound **2**;

**Figure S14.** NOESY spectrum of compound **2**;

**Figure S15.** HRESI mass spectrum of compound **3**;

**Figure S16.**  $^1\text{H}$  NMR (500 MHz,  $\text{DMSO-}d_6$ ) spectrum of compound **3**;

**Figure S17.**  $^{13}\text{C}$  NMR (125 MHz,  $\text{DMSO-}d_6$ ) and DEPT spectra of compound **3**;

**Figure S18.** COSY spectrum of compound **3**;

**Figure S19.** HSQC spectrum of compound **3**;

**Figure S20.** HMBC spectrum of compound **3**;

**Figure S21.** NOESY spectrum of compound **3**;

**Figure S22.** HRESI mass spectrum of compound **4**;

**Figure S23.**  $^1\text{H}$  NMR (500 MHz,  $\text{DMSO-}d_6$ ) spectrum of compound **4**;

**Figure S24.**  $^{13}\text{C}$  NMR (125 MHz,  $\text{DMSO-}d_6$ ) and DEPT spectra of compound **4**;

**Figure S25.** COSY spectrum of compound **4**;

**Figure S26.** HSQC spectrum of compound **4**;

**Figure S27.** HMBC spectrum of compound **4**;

**Figure S28.** NOESY spectrum of compound **4**;

**Figure S29.** HRESI mass spectrum of compound **5**;

**Figure S30.**  $^1\text{H}$  NMR (500 MHz,  $\text{DMSO-}d_6$ ) spectrum of compound **5**;

**Figure S31.**  $^{13}\text{C}$  NMR (125 MHz,  $\text{DMSO-}d_6$ ) and DEPT spectra of compound **5**;

**Figure S32.** COSY spectrum of compound **5**;

**Figure S33.** HSQC spectrum of compound **5**;

**Figure S34.** HMBC spectrum of compound **5**;

**Figure S35.** NOESY spectrum of compound **5**;

**Figure S36.** HRESI mass spectrum of compound **6**;

**Figure S37.**  $^1\text{H}$  NMR (500 MHz, DMSO- $d_6$ ) spectrum of compound **6**;

**Figure S38.**  $^{13}\text{C}$  NMR (125 MHz, DMSO- $d_6$ ) and DEPT spectra of compound **6**;

**Figure S39.** COSY spectrum of compound **6**;

**Figure S40.** HSQC spectrum of compound **6**;

**Figure S41.** HMBC spectrum of compound **6**;

**Figure S42.** NOESY spectrum of compound **6**;

**Figure S43.** HRESI mass spectrum of compound **7**;

**Figure S44.**  $^1\text{H}$  NMR (500 MHz, DMSO- $d_6$ ) spectrum of compound **7**;

**Figure S45.**  $^{13}\text{C}$  NMR (125 MHz, DMSO- $d_6$ ) and DEPT spectra of compound **7**;

**Figure S46.** COSY spectrum of compound **7**;

**Figure S47.** HSQC spectrum of compound **7**;

**Figure S48.** HMBC spectrum of compound **7**;

**Figure S49.** NOESY spectrum of compound **7**;

**Figure S50.** HRESI mass spectrum of compound **8**;

**Figure S51.**  $^1\text{H}$  NMR (500 MHz, DMSO- $d_6$ ) spectrum of compound **8**;

**Figure S52.**  $^{13}\text{C}$  NMR (125 MHz, DMSO- $d_6$ ) and DEPT spectra of compound **8**;

**Figure S53.** COSY spectrum of compound **8**;

**Figure S54.** HSQC spectrum of compound **8**;

**Figure S55.** HMBC spectrum of compound **8**;

**Figure S56.** NOESY spectrum of compound **8**;

**Figure S57.** Structures and populations of conformers obtained by gas phase  
B3LYP/6-31G(d) reoptimization of the initial MMFF conformers of (6*R*,  
7*R*, 8*R*, 10*S*, 14*S*, and 15*R*)-**4** above 2% population;

**Figure S58.** Structures and populations of conformers obtained by gas phase  
B3LYP/6-31G(d) reoptimization of the initial MMFF conformers of (6*R*,  
7*R*, 8*R*, 10*R*, 12*S*, and 13*S*)-**5** above 2% population;

**Figure S59.** Experimental and calculated ECD at different levels of compounds **4** and  
**5**;

**Table S1.** Cartesian coordinates for the low-energy reoptimized MMFF conformers of  
**4** calculated at B3LYP/6-31G(d) level of theory in vacuo;

**Table S2.** Cartesian coordinates for the low-energy reoptimized MMFF conformers of **5** calculated at B3LYP/6-31G(d) level of theory in vacuo.

**Figure S1.** HRESI mass spectrum of compound **1**;

20210924-AS324-79\_210924111037 #40-41 RT: 0.52-0.53 AV: 2 NL: 1.13E7  
T: FTMS - p ESI Full ms [150.00-1000.00]

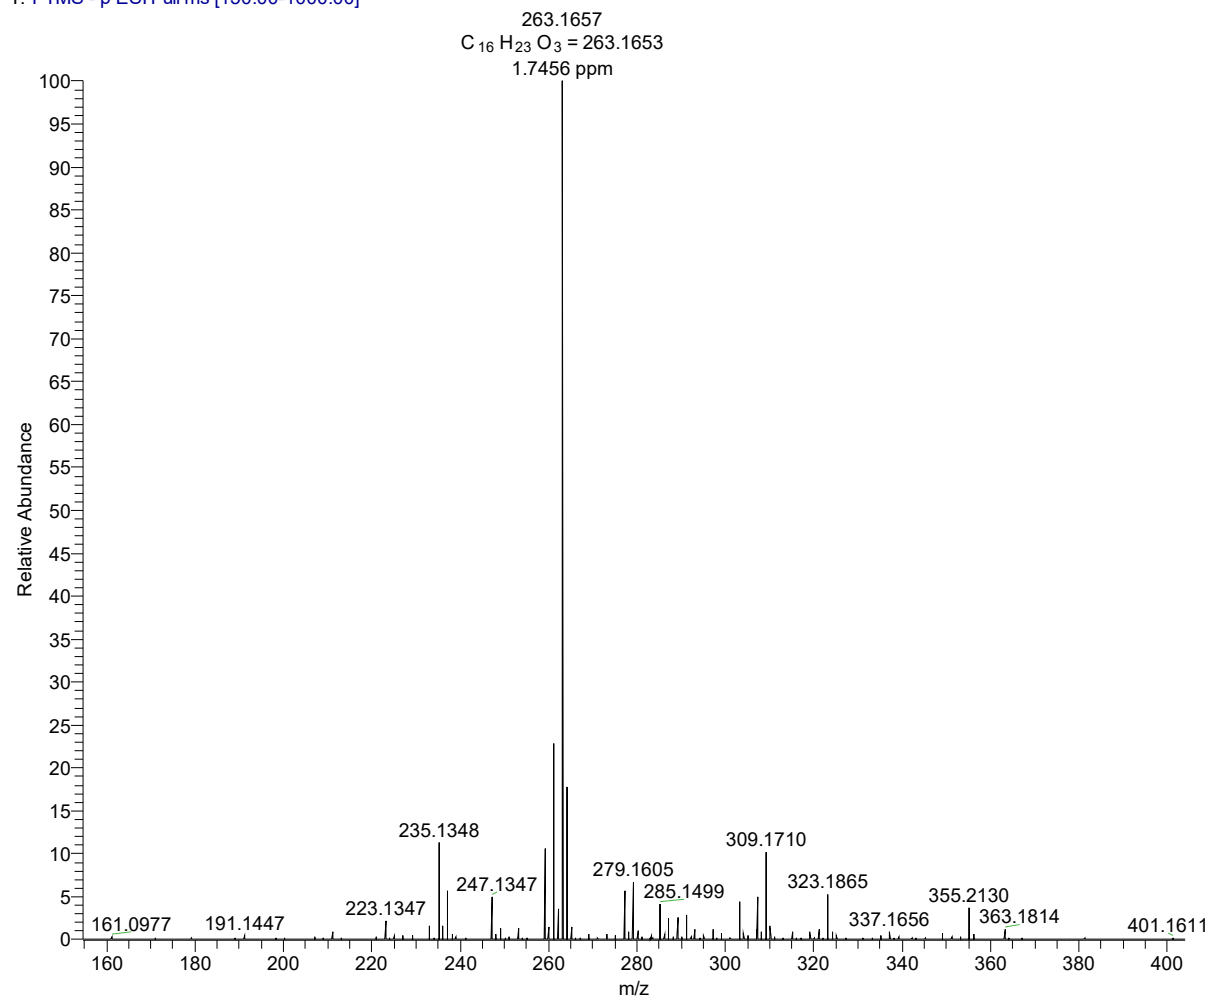

**Figure S2.**  $^1\text{H}$  NMR (500 MHz,  $\text{DMSO}-d_6$ ) spectrum of compound **1**;

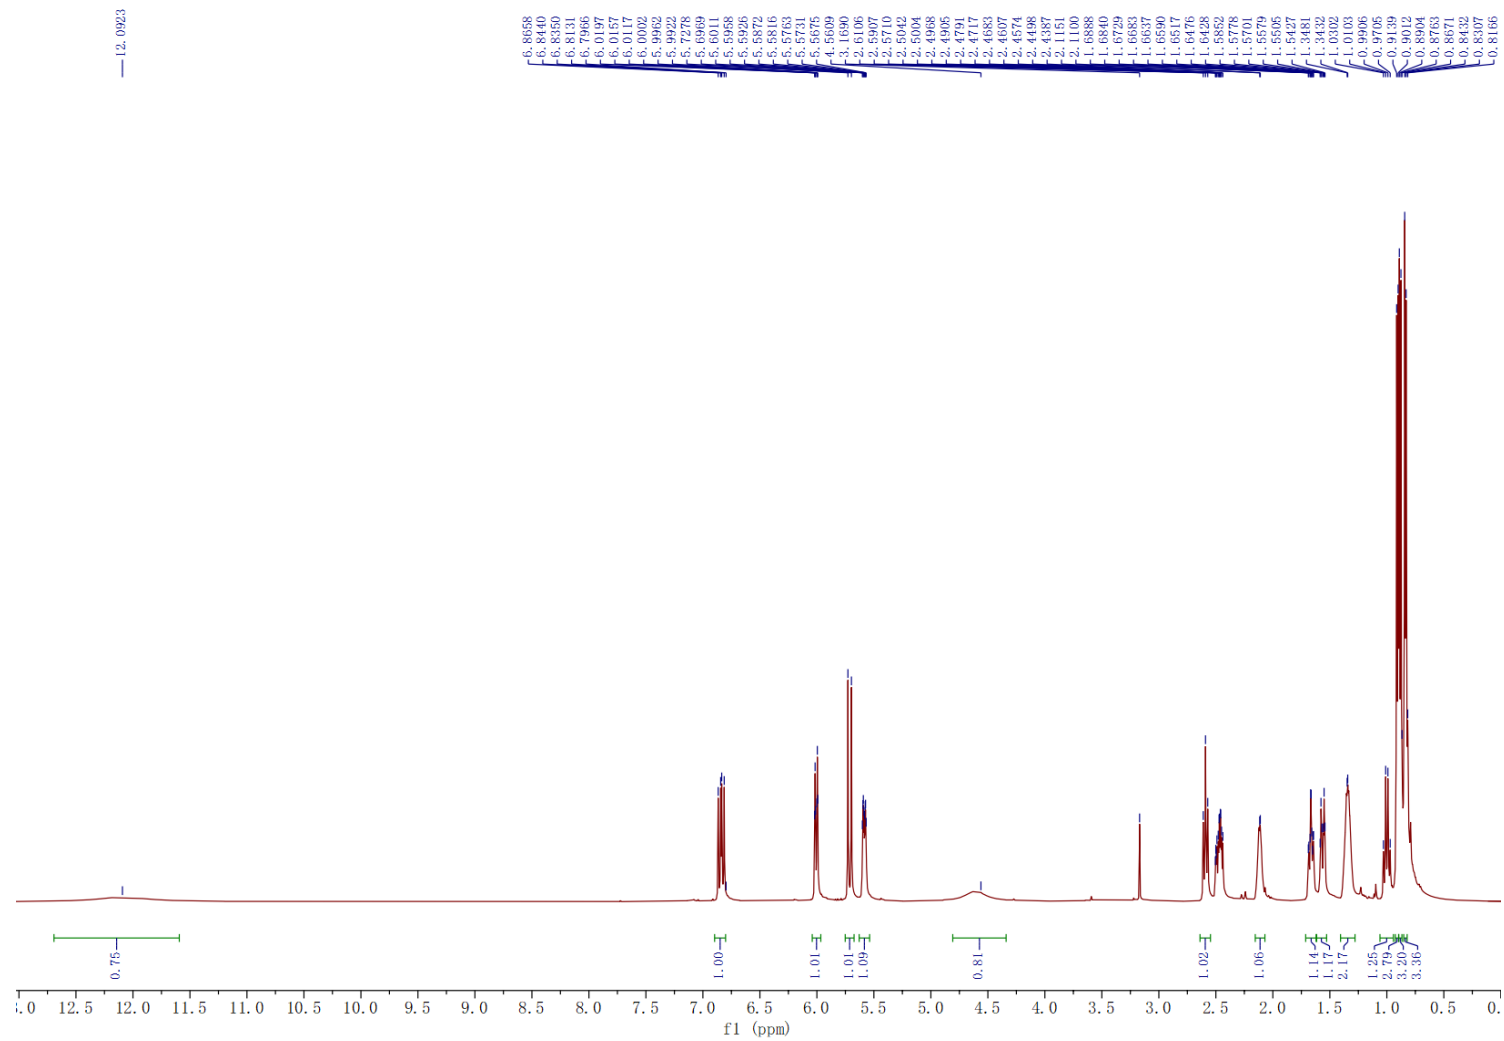

**Figure S3.**  $^{13}\text{C}$  NMR (125 MHz,  $\text{DMSO-}d_6$ ) and DEPT spectra of compound **1**;

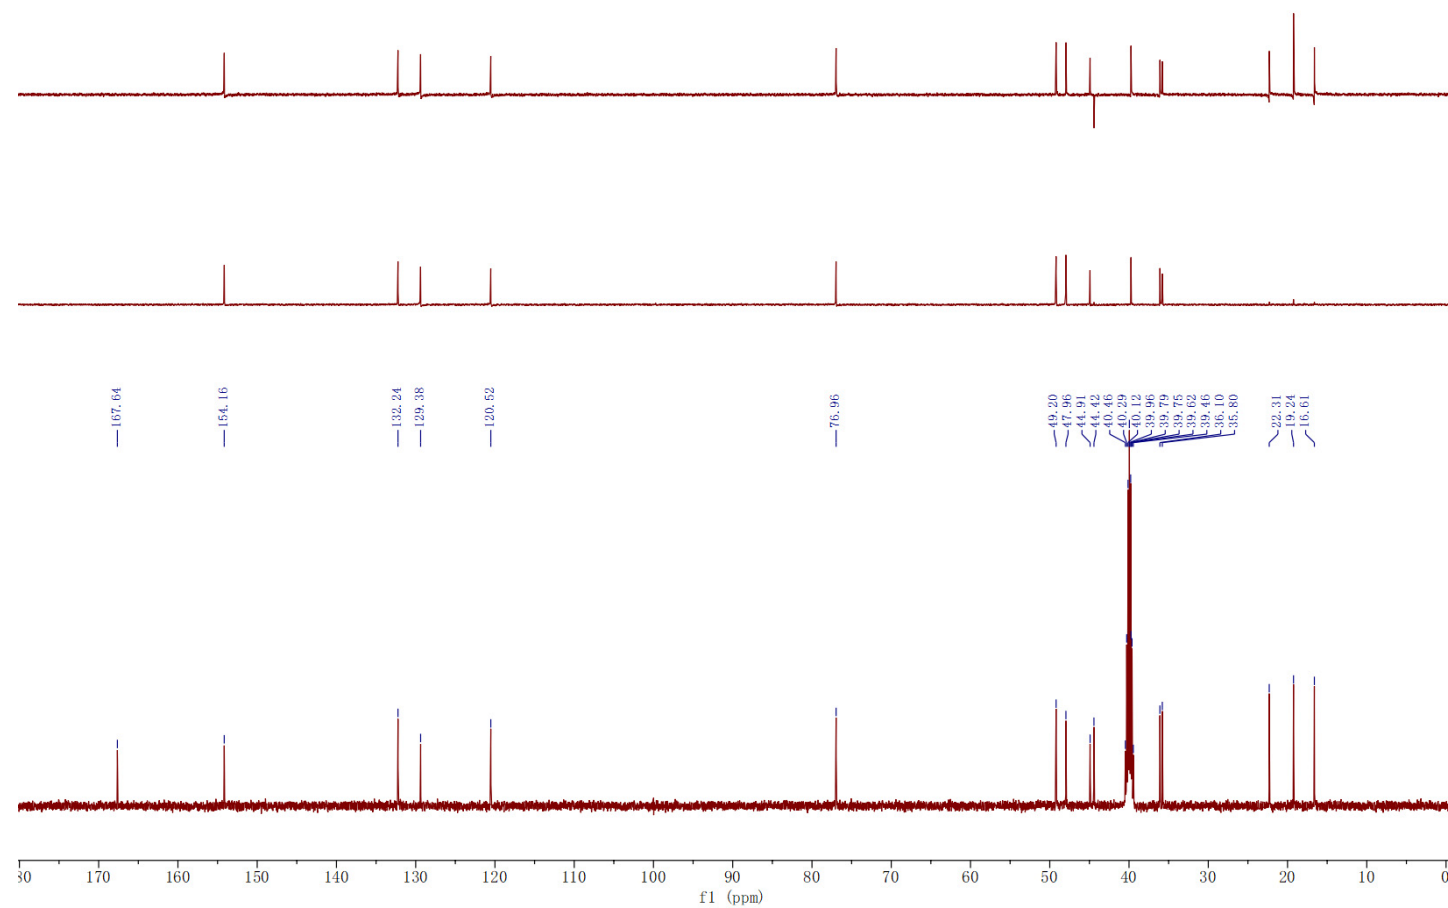

**Figure S4.** COSY spectrum of compound **1**;

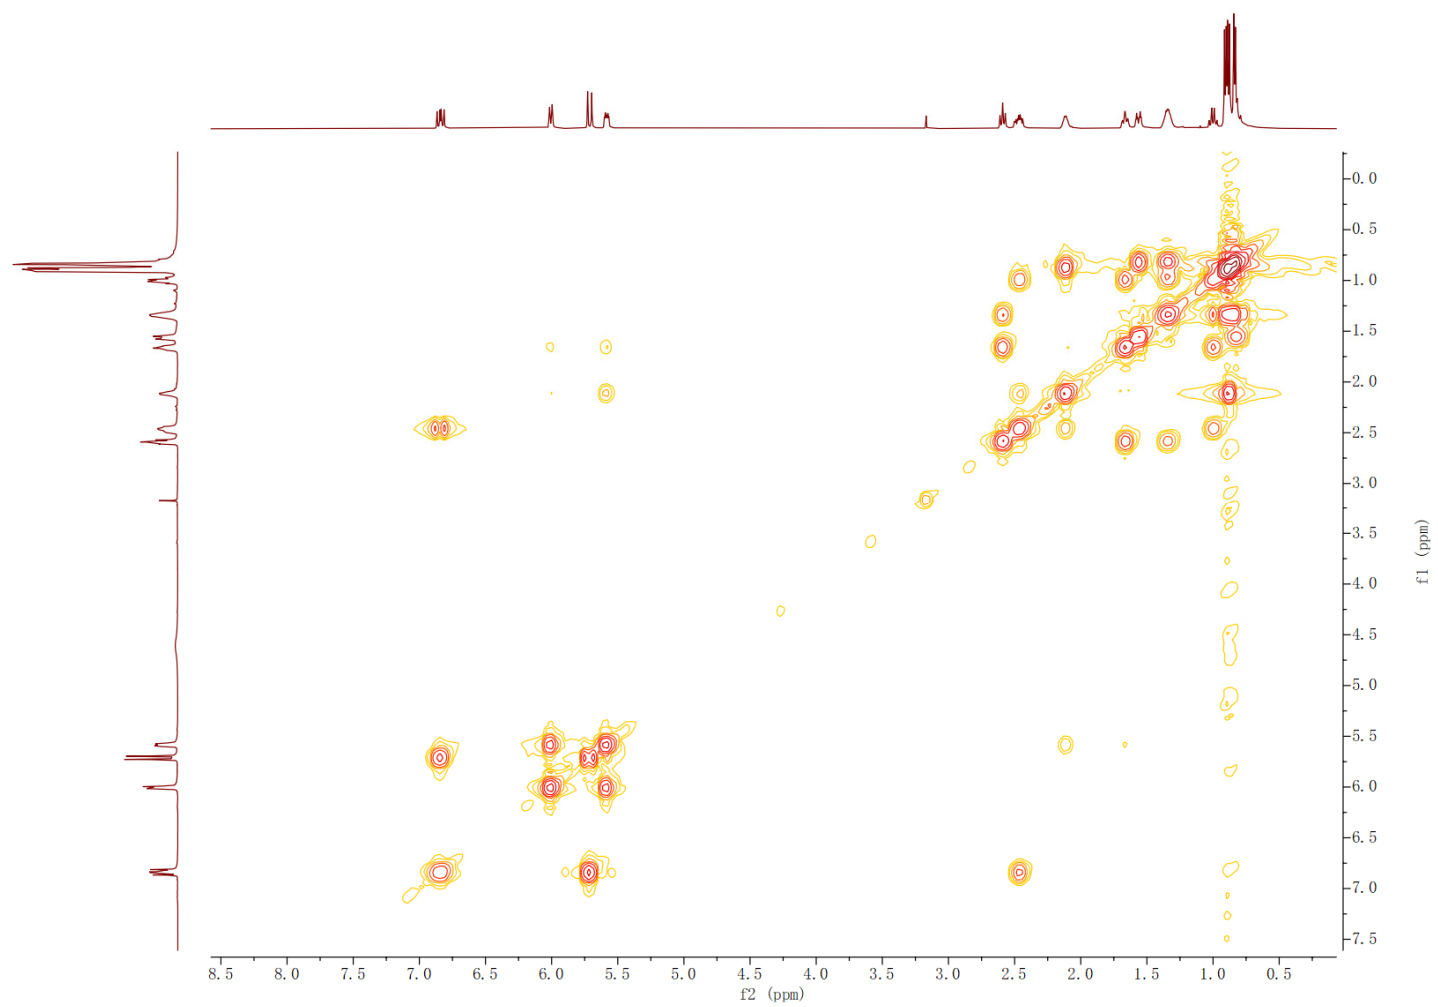



**Figure S5.** HSQC spectrum of compound **1**;

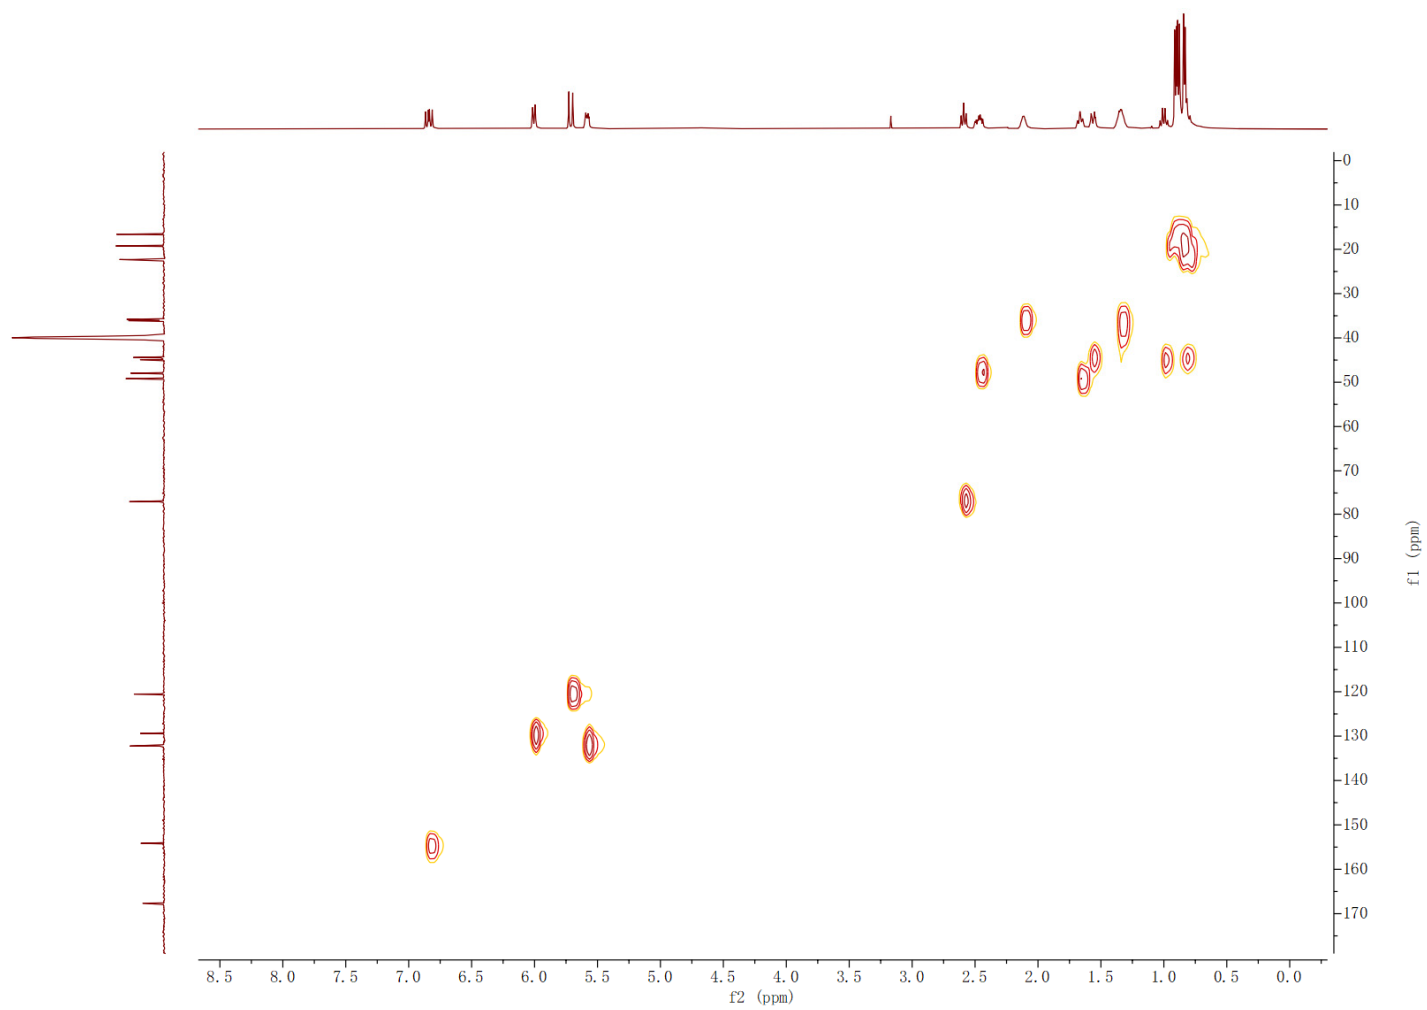

**Figure S6.** HMBC spectrum of compound **1**;

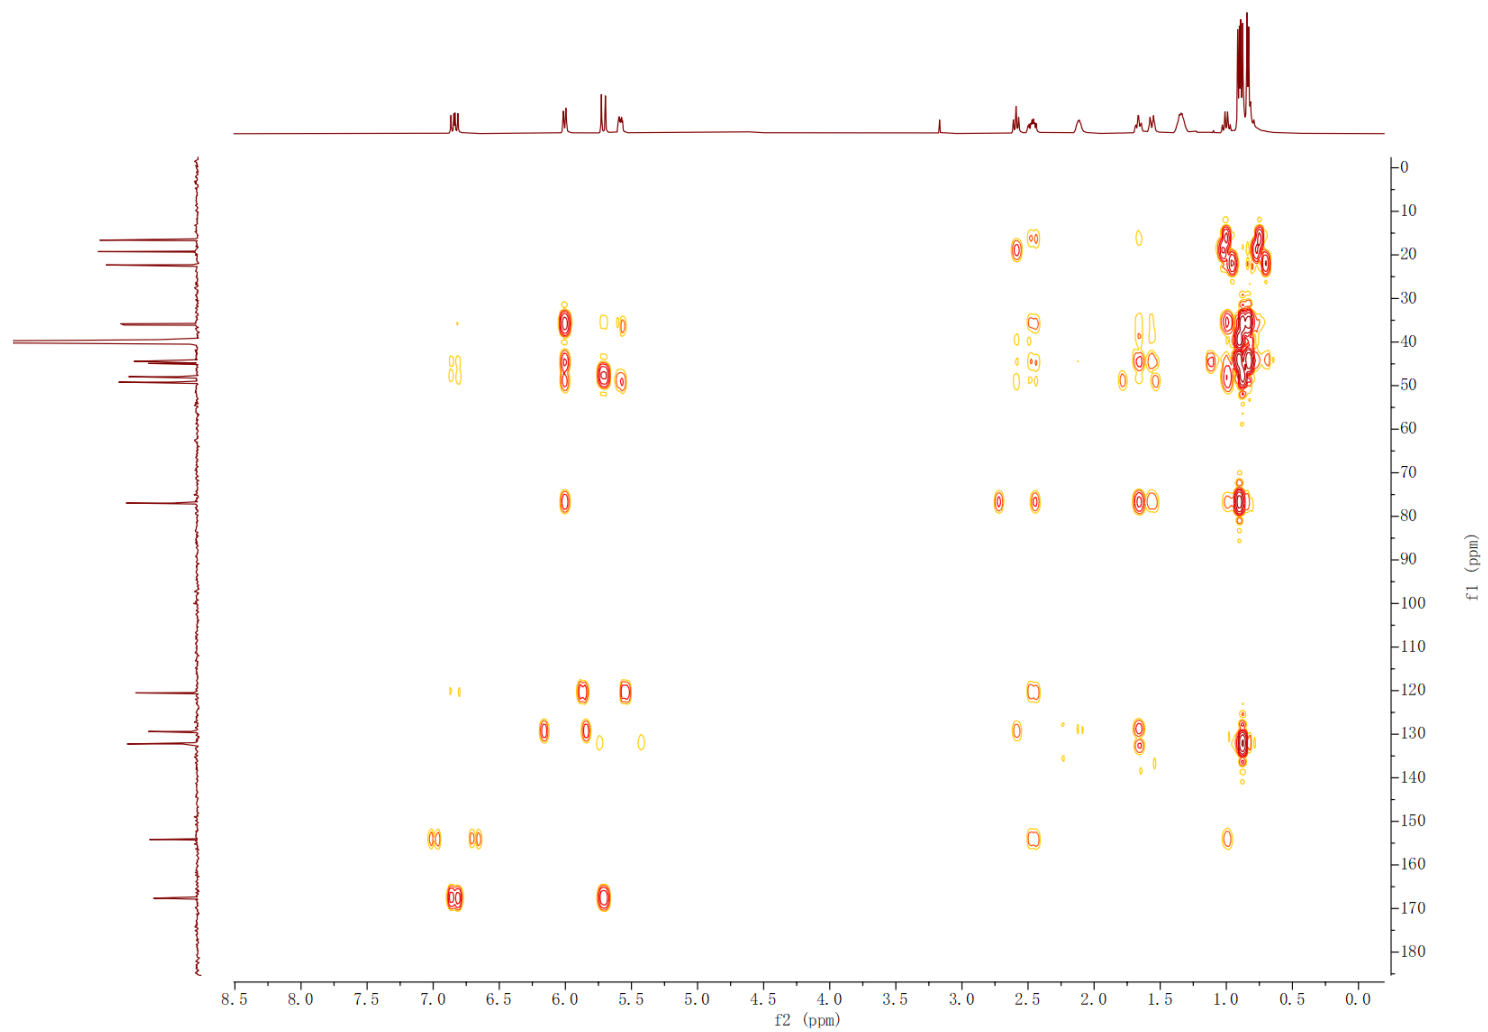

**Figure S7.** NOESY spectrum of compound **1**;

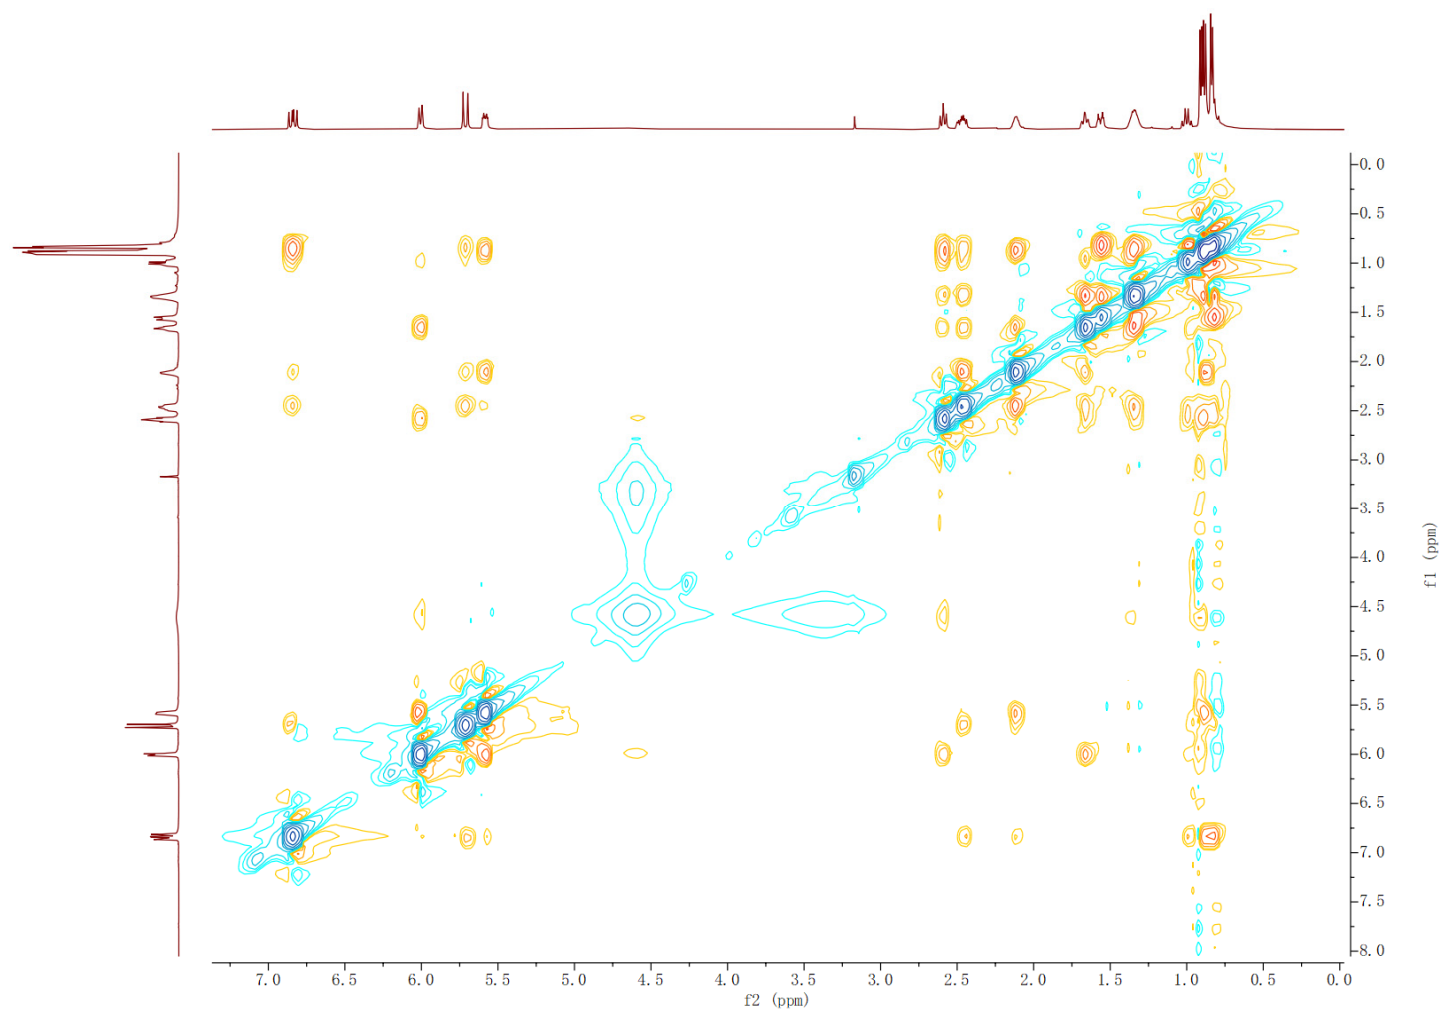

**Figure S8.** HRESI mass spectrum of compound **2**;

20211103-AS324-87\_211103090240 #49-50 RT: 0.58-0.59 AV: 2 NL: 3.58E7  
T: FTMS - p ESI Full ms [150.00-1000.00]

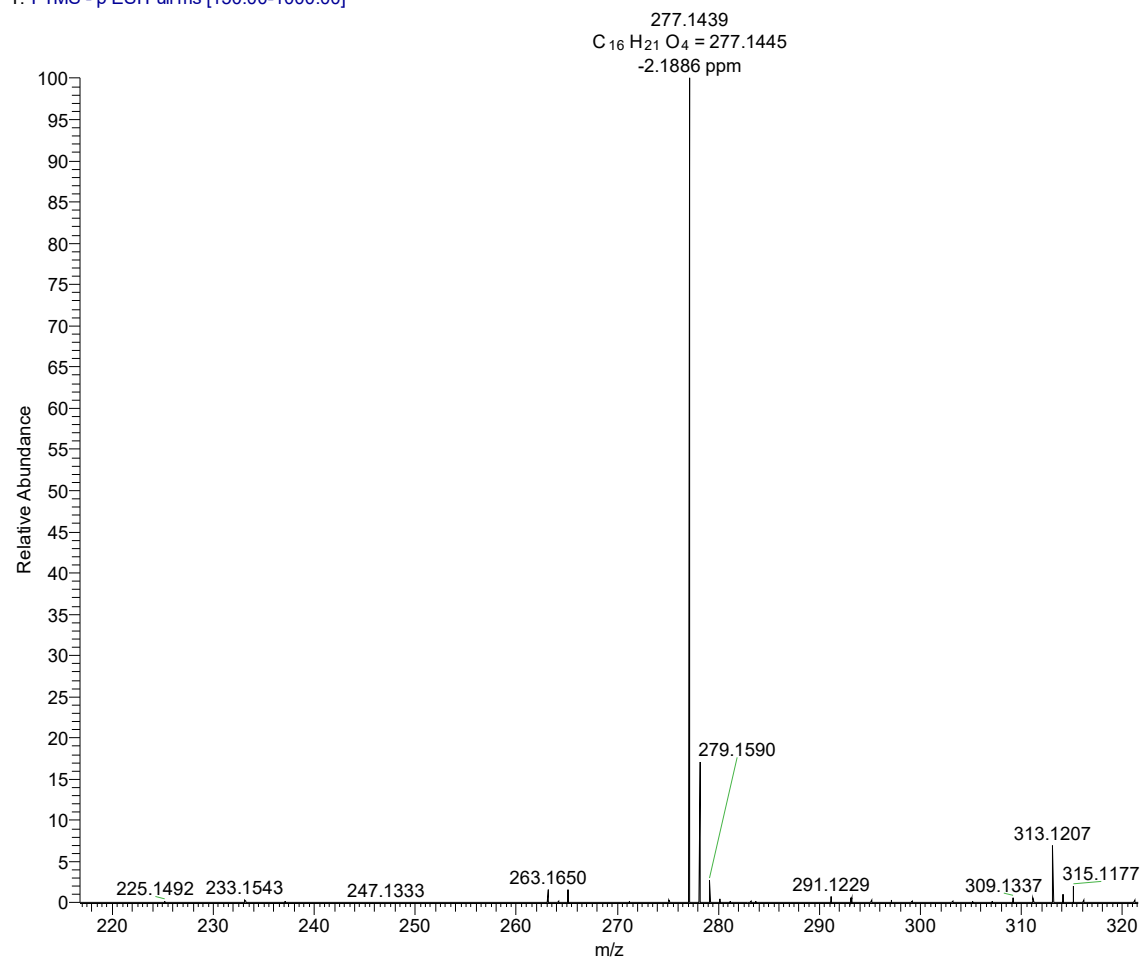

**Figure S9.**  $^1\text{H}$  NMR (500 MHz,  $\text{DMSO-}d_6$ ) spectrum of compound **2**;

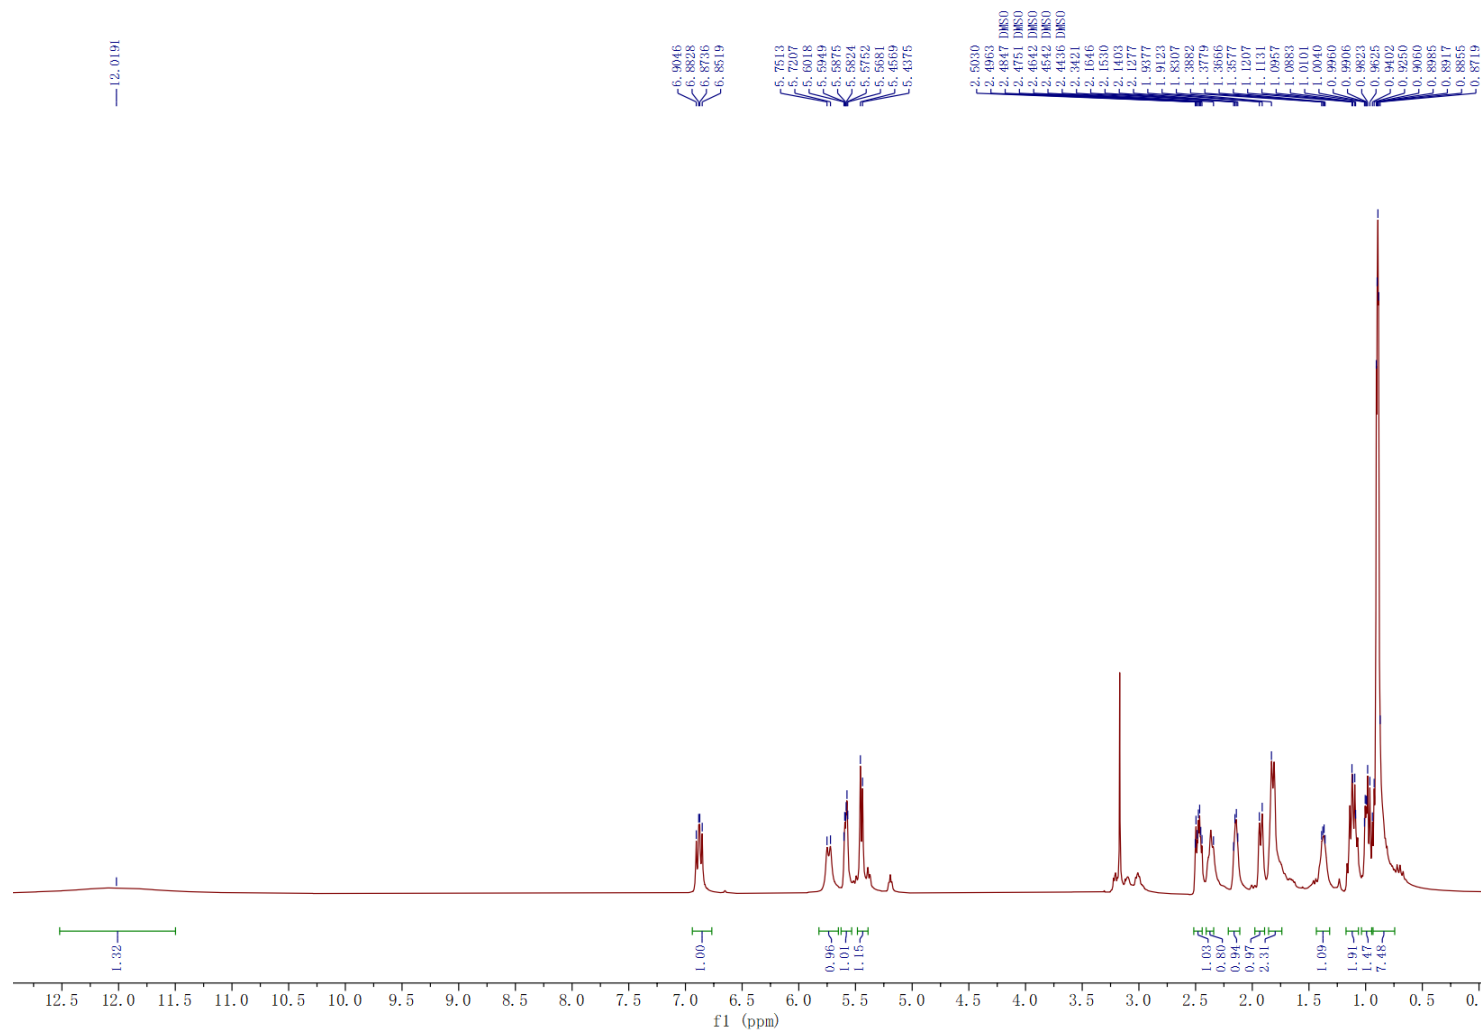

**Figure S10.**  $^{13}\text{C}$  NMR (125 MHz,  $\text{DMSO-}d_6$ ) and DEPT spectra of compound **2**;

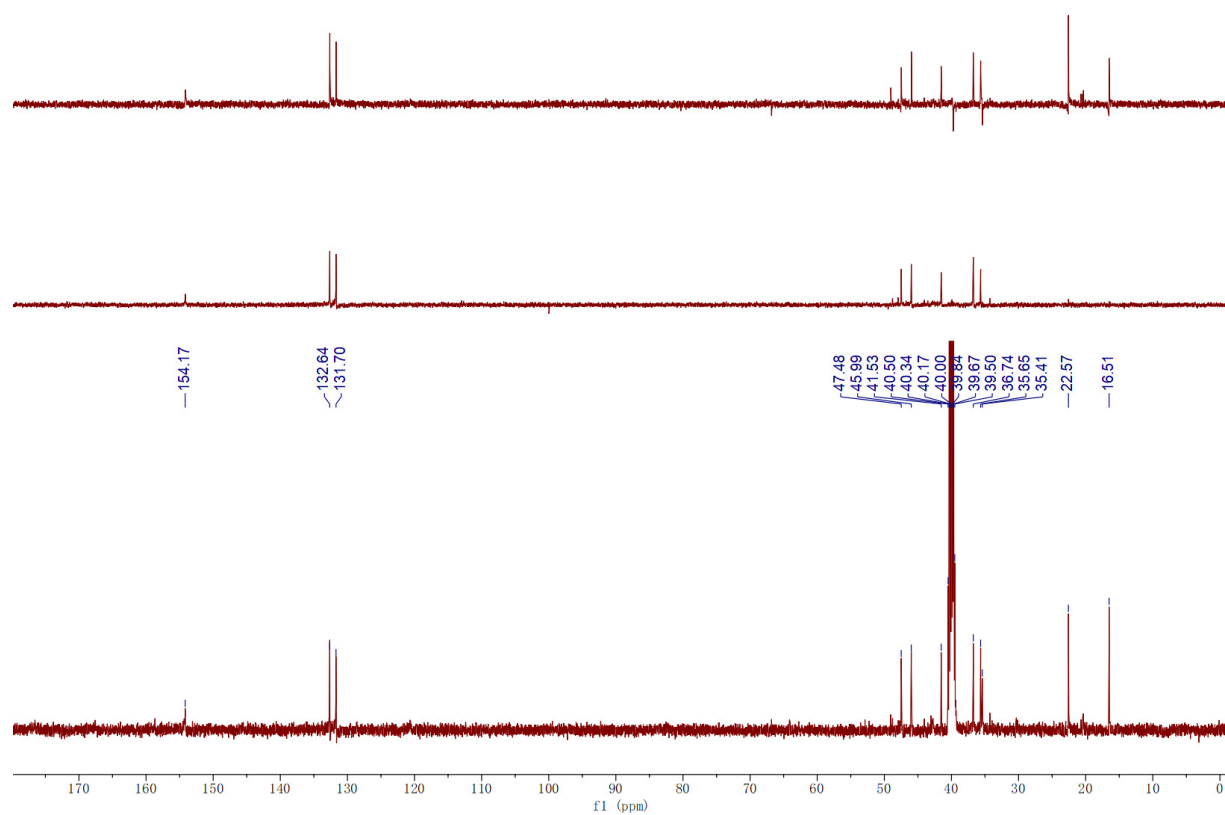

**Figure S11.** COSY spectrum of compound **2**;

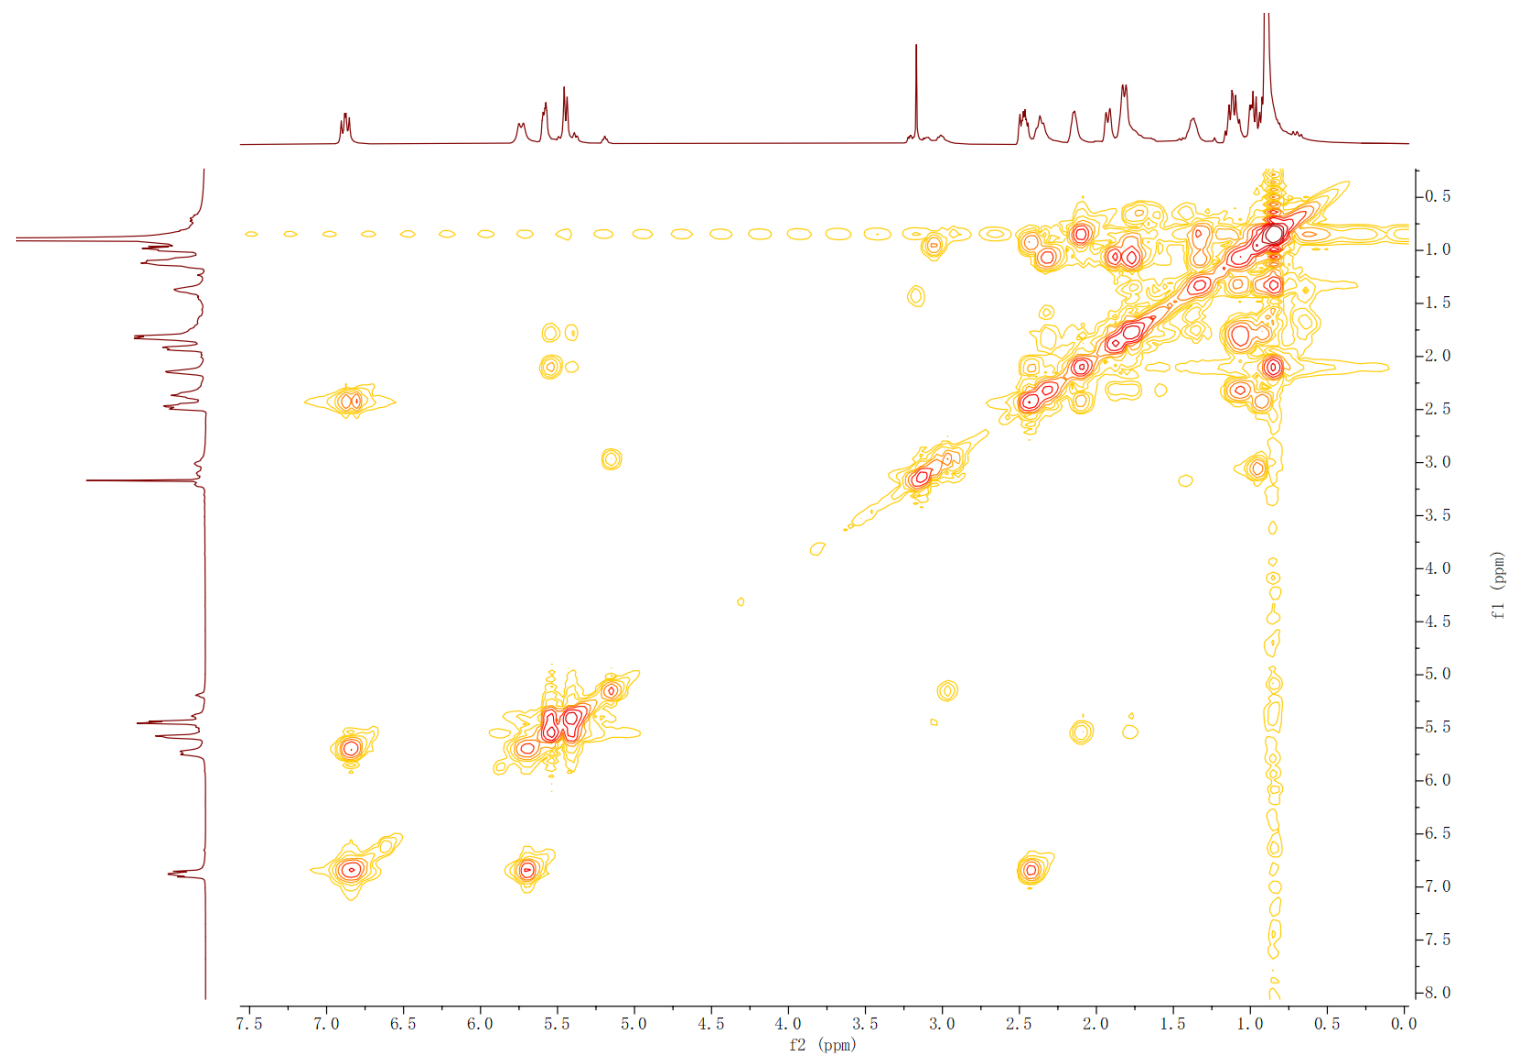

**Figure S12.** HSQC spectrum of compound **2**;

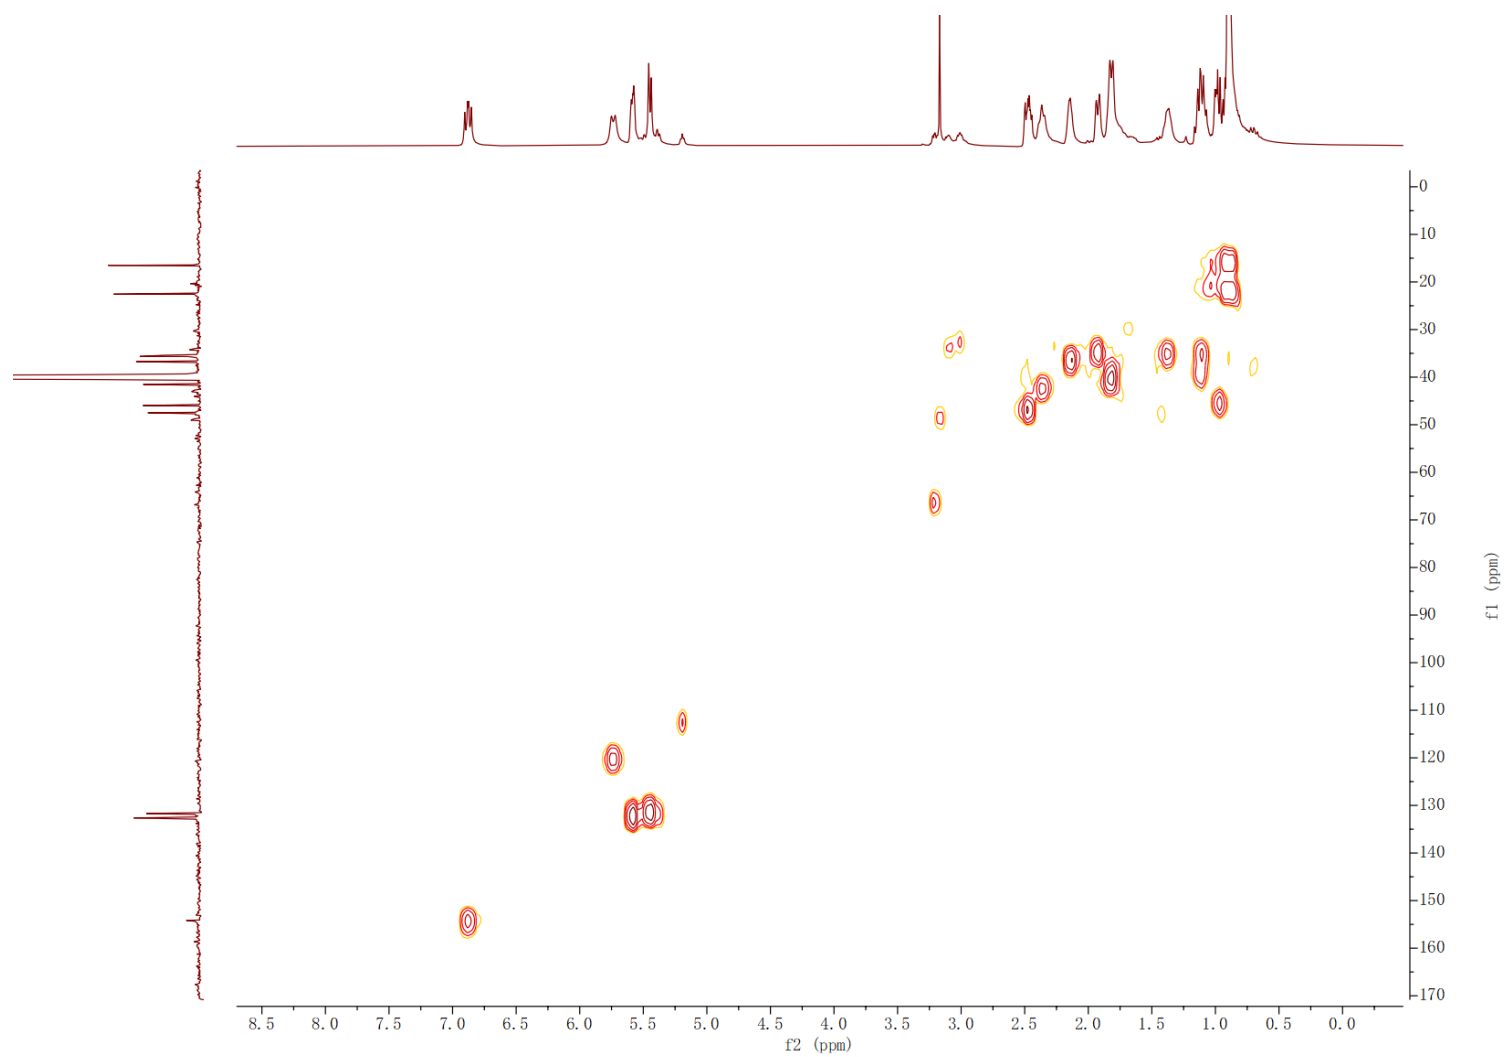



**Figure S13.** HMBC spectrum of compound **2**;

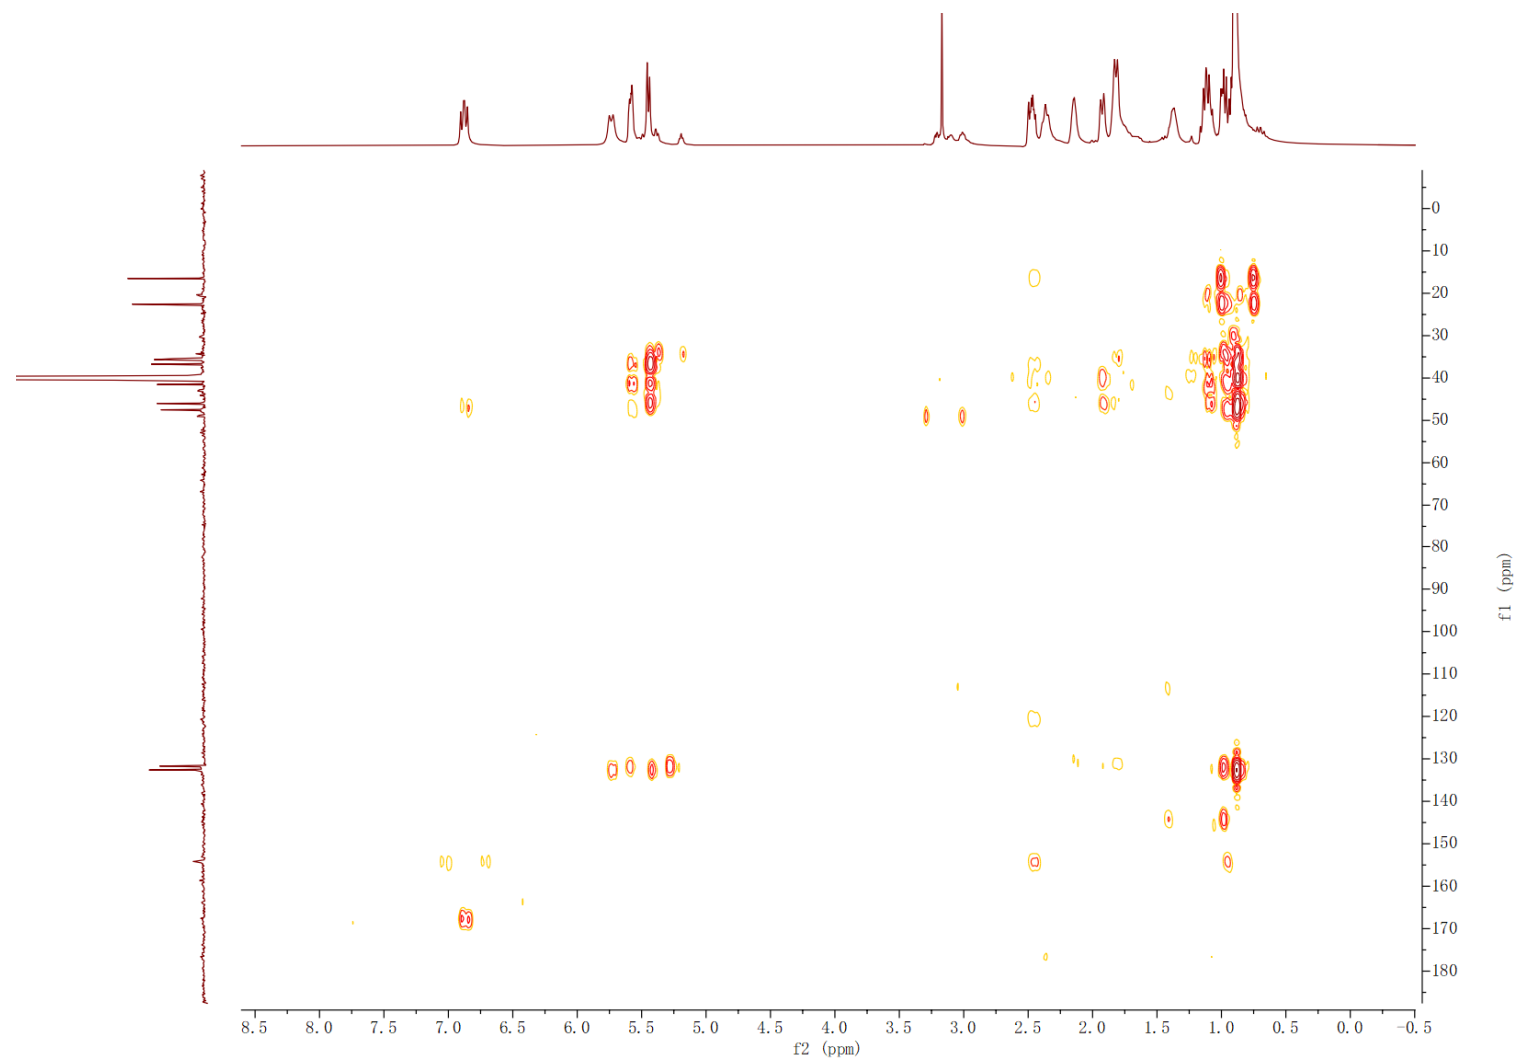

**Figure S14.** NOESY spectrum of compound **2**;

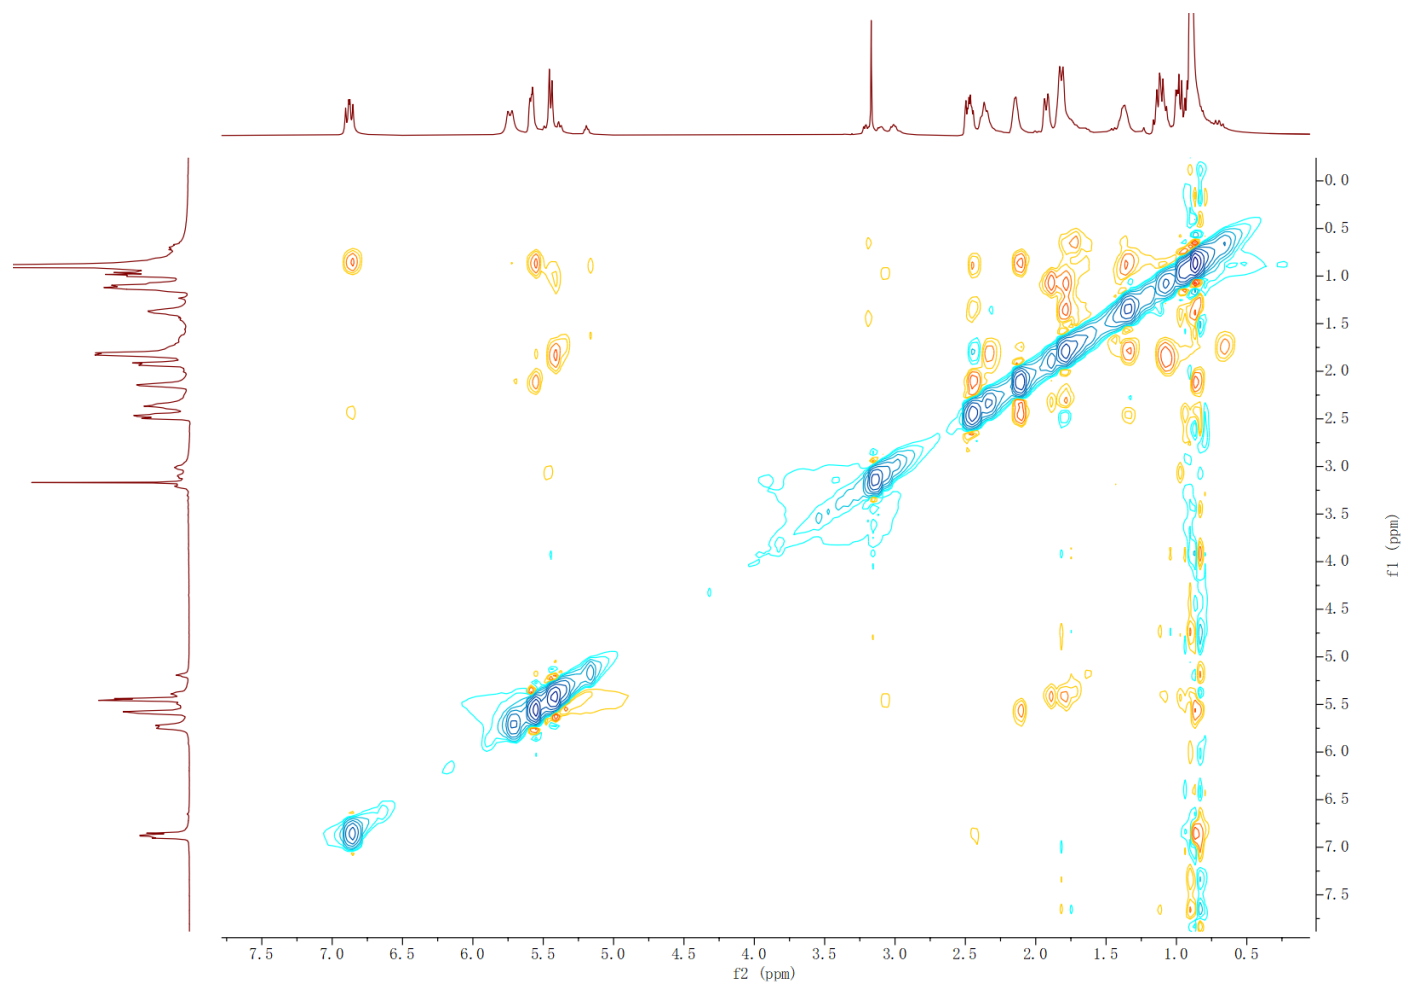

**Figure S15.** HRESI mass spectrum of compound **3**;

20210924-AS324-83\_210924111037 #90 RT: 1.08 AV: 1 NL: 1.27E7  
T: FTMS - p ESI Full ms [150.00-1000.00]

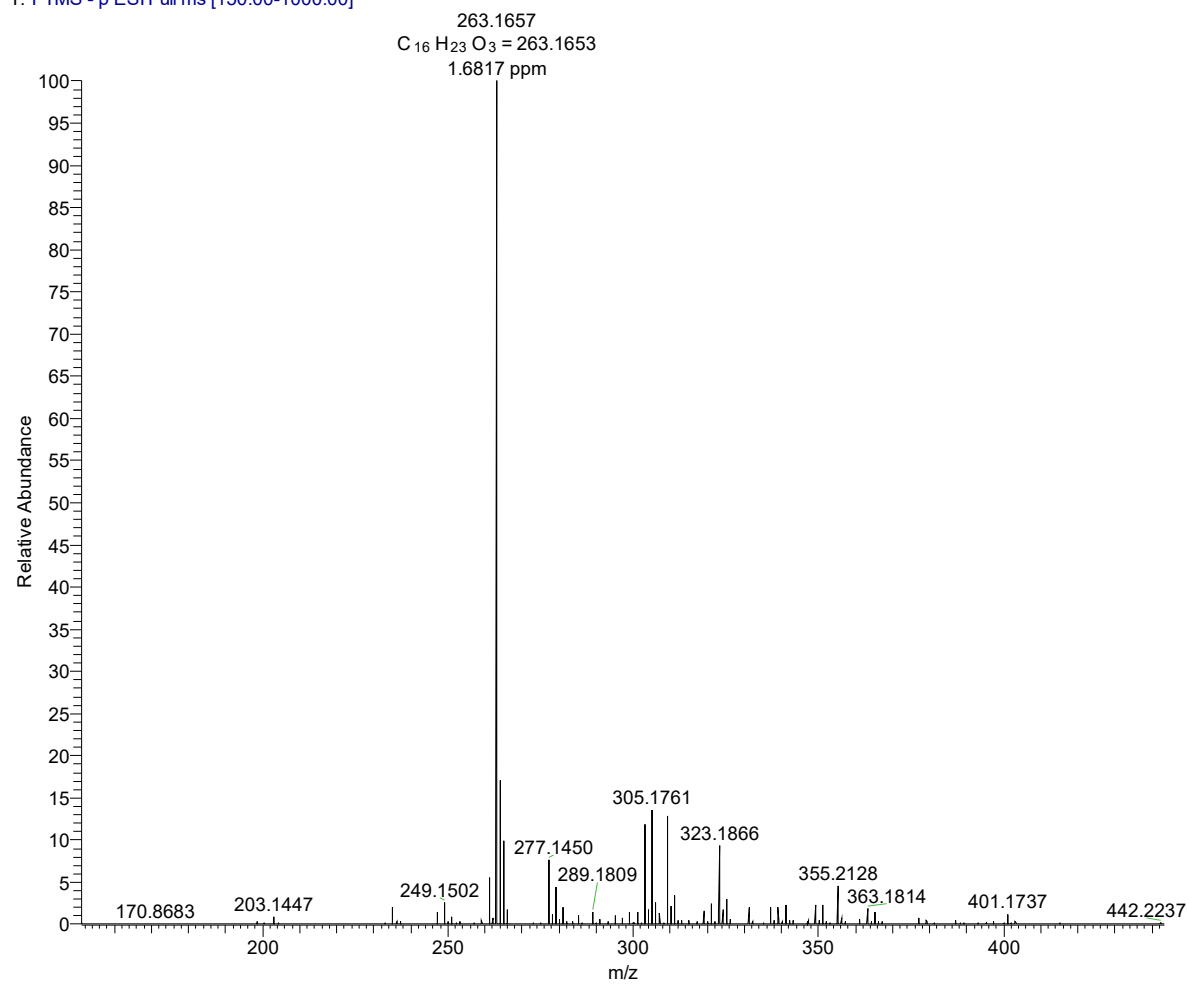

**Figure S16.**  $^1\text{H}$  NMR (500 MHz,  $\text{DMSO}-d_6$ ) spectrum of compound **3**;

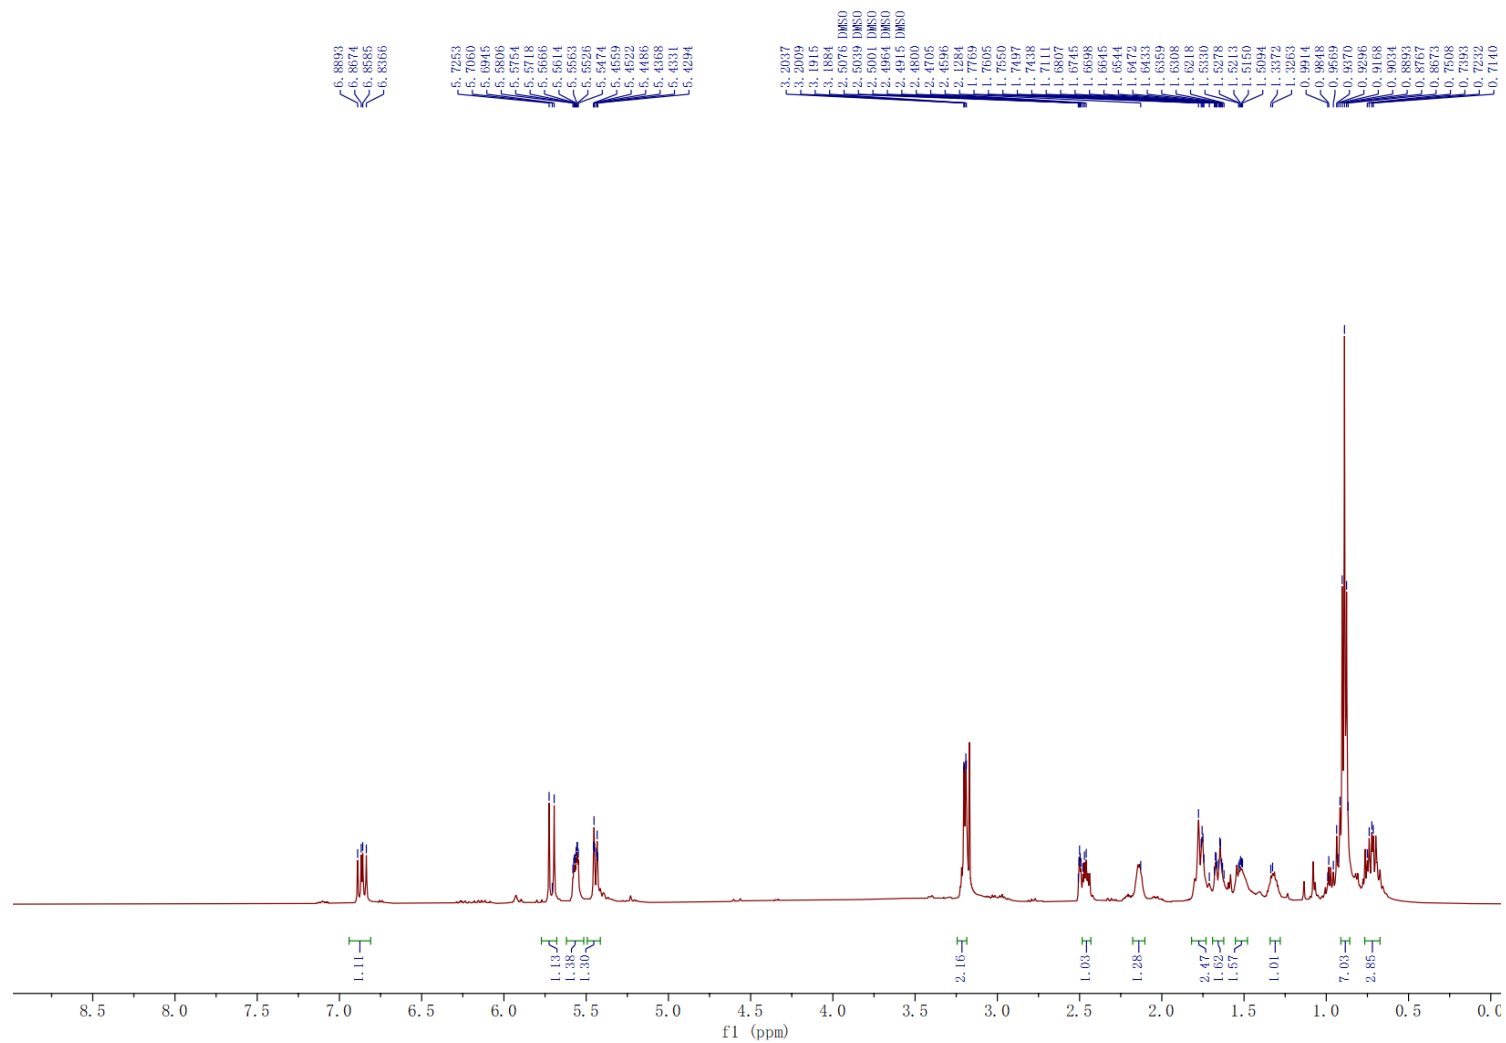

**Figure S17.**  $^{13}\text{C}$  NMR (125 MHz,  $\text{DMSO-}d_6$ ) and DEPT spectra of compound **3**;

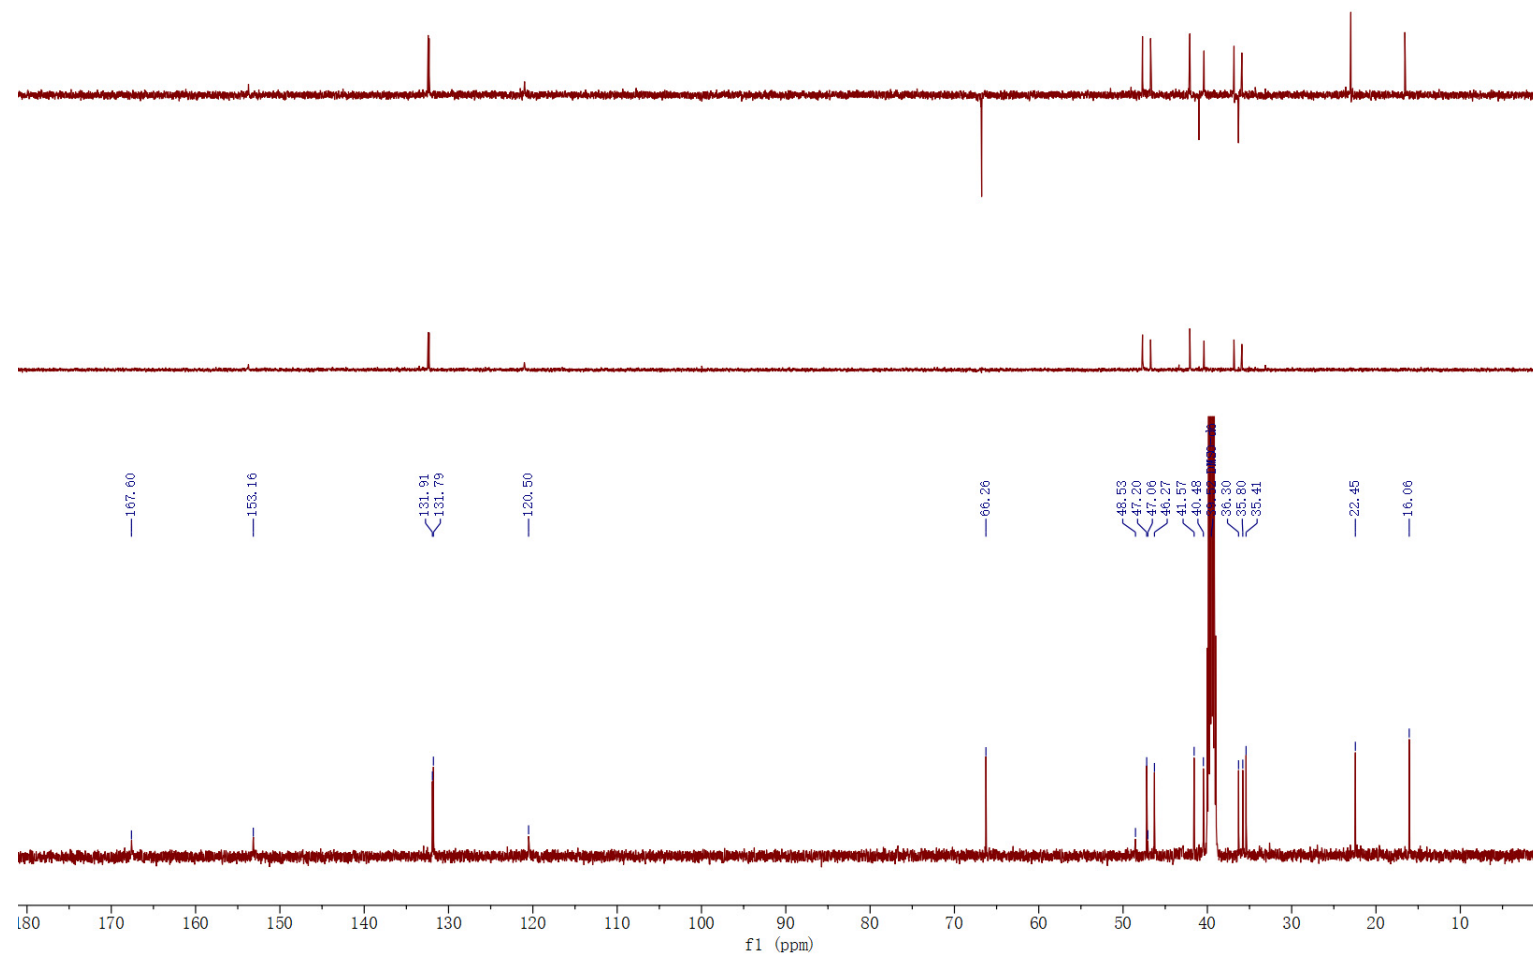

**Figure S18.** COSY spectrum of compound **3**;

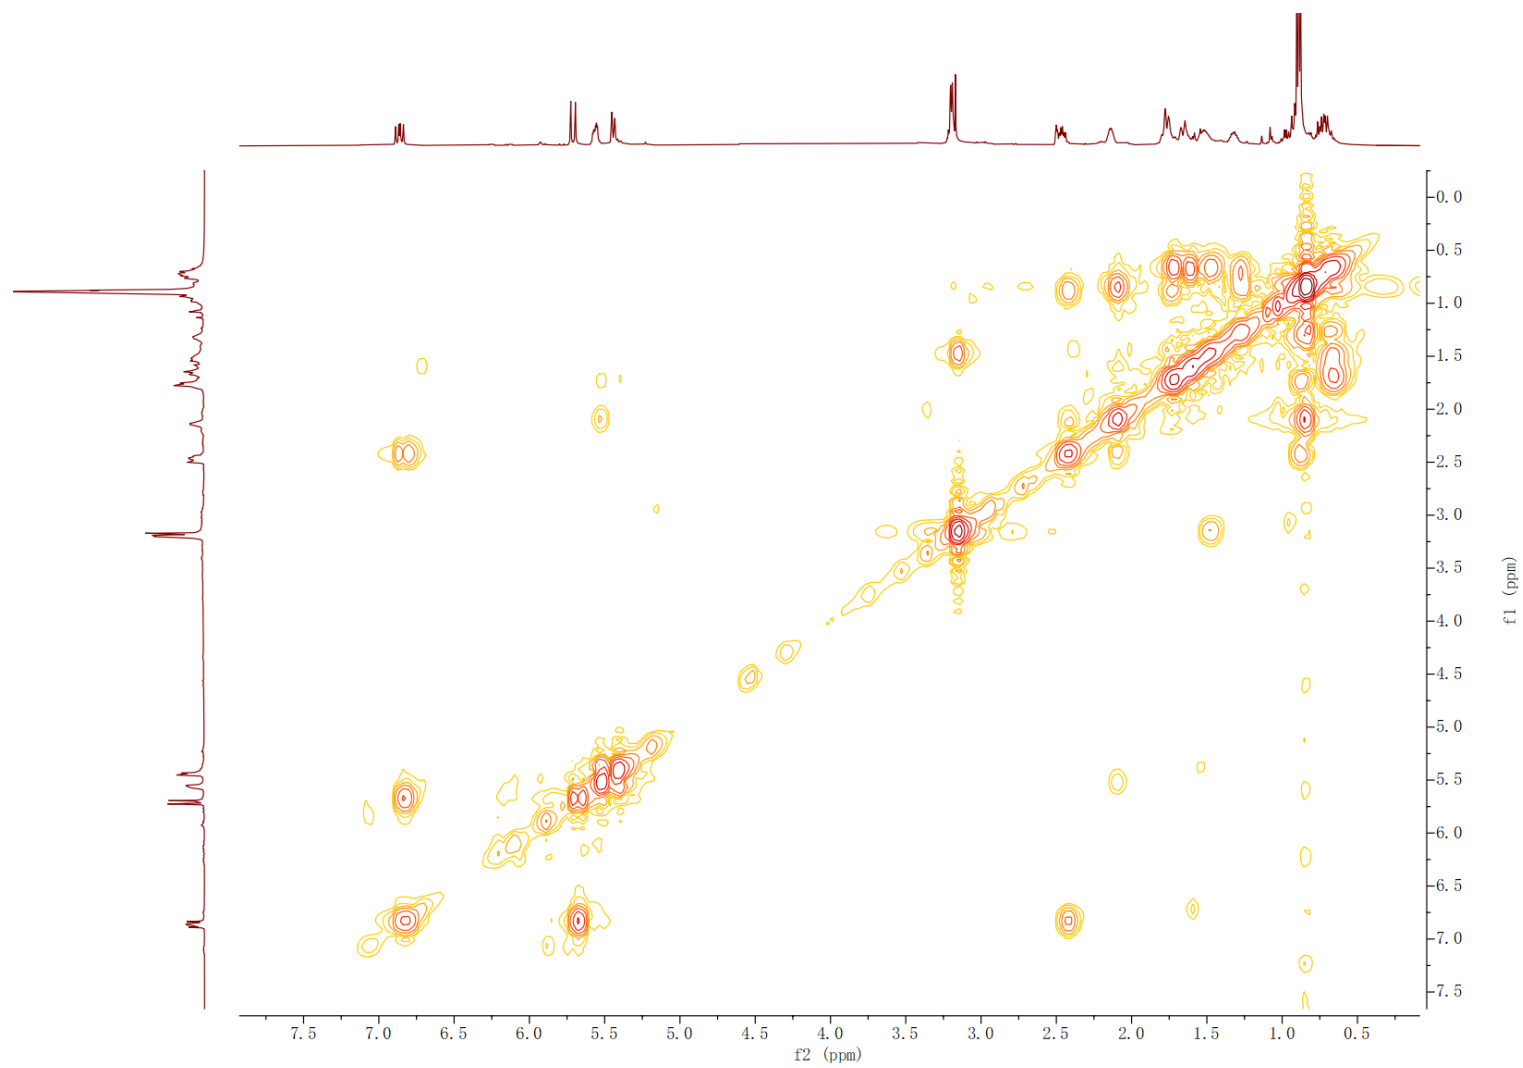

**Figure S19.** HSQC spectrum of compound **3**;

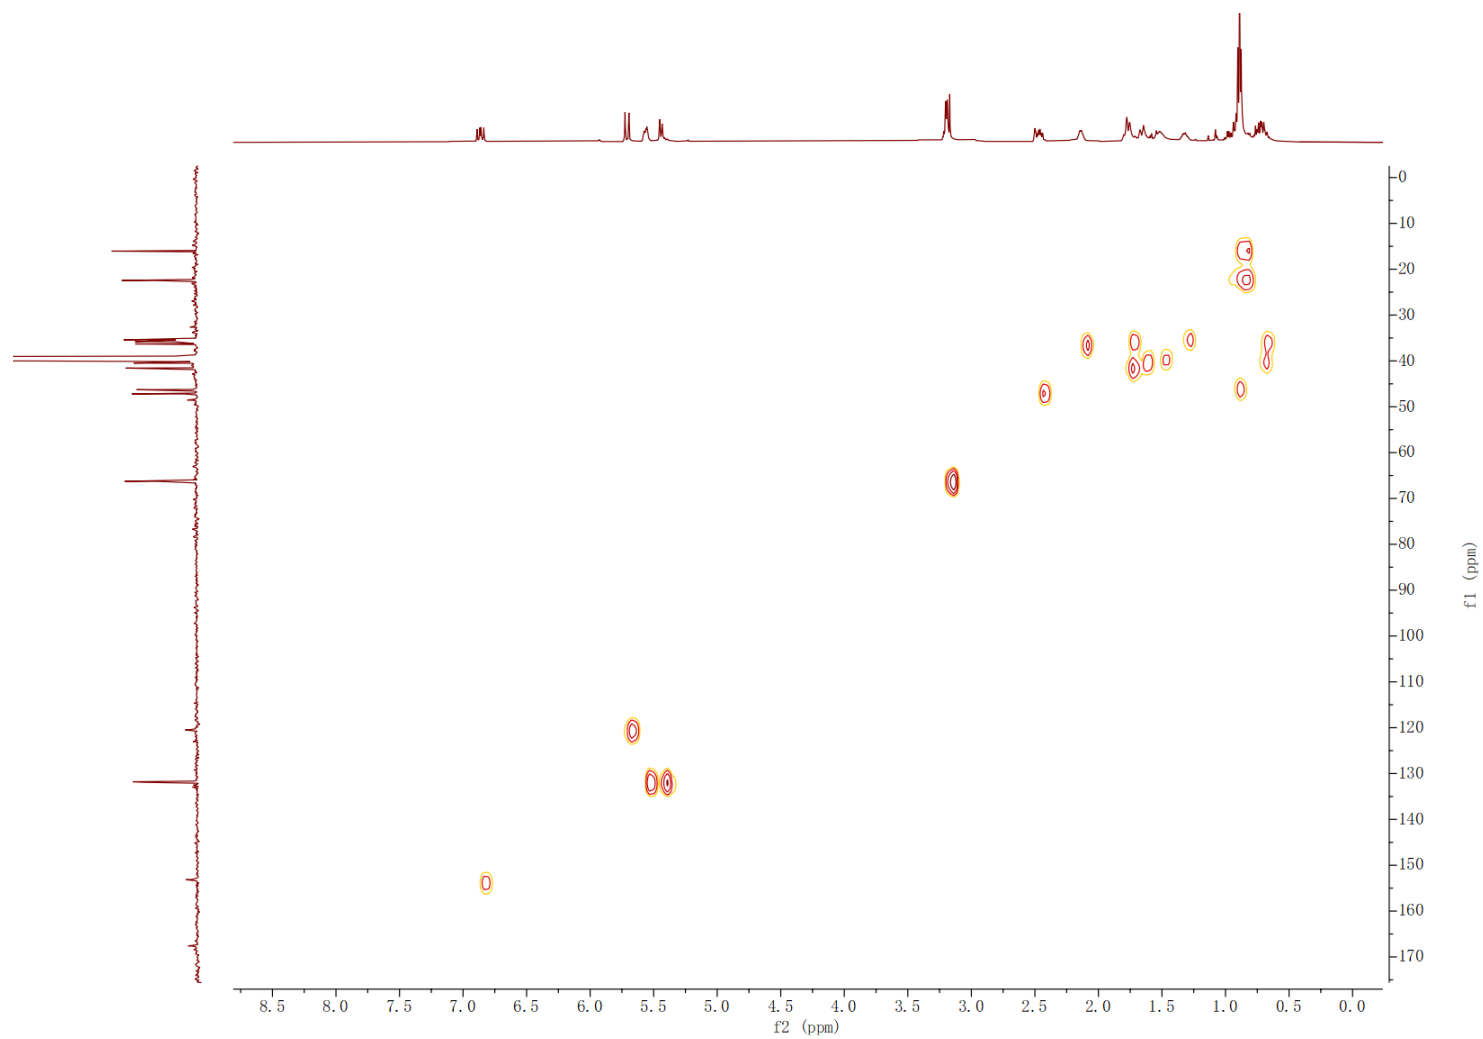

**Figure S20.** HMBC spectrum of compound **3**;

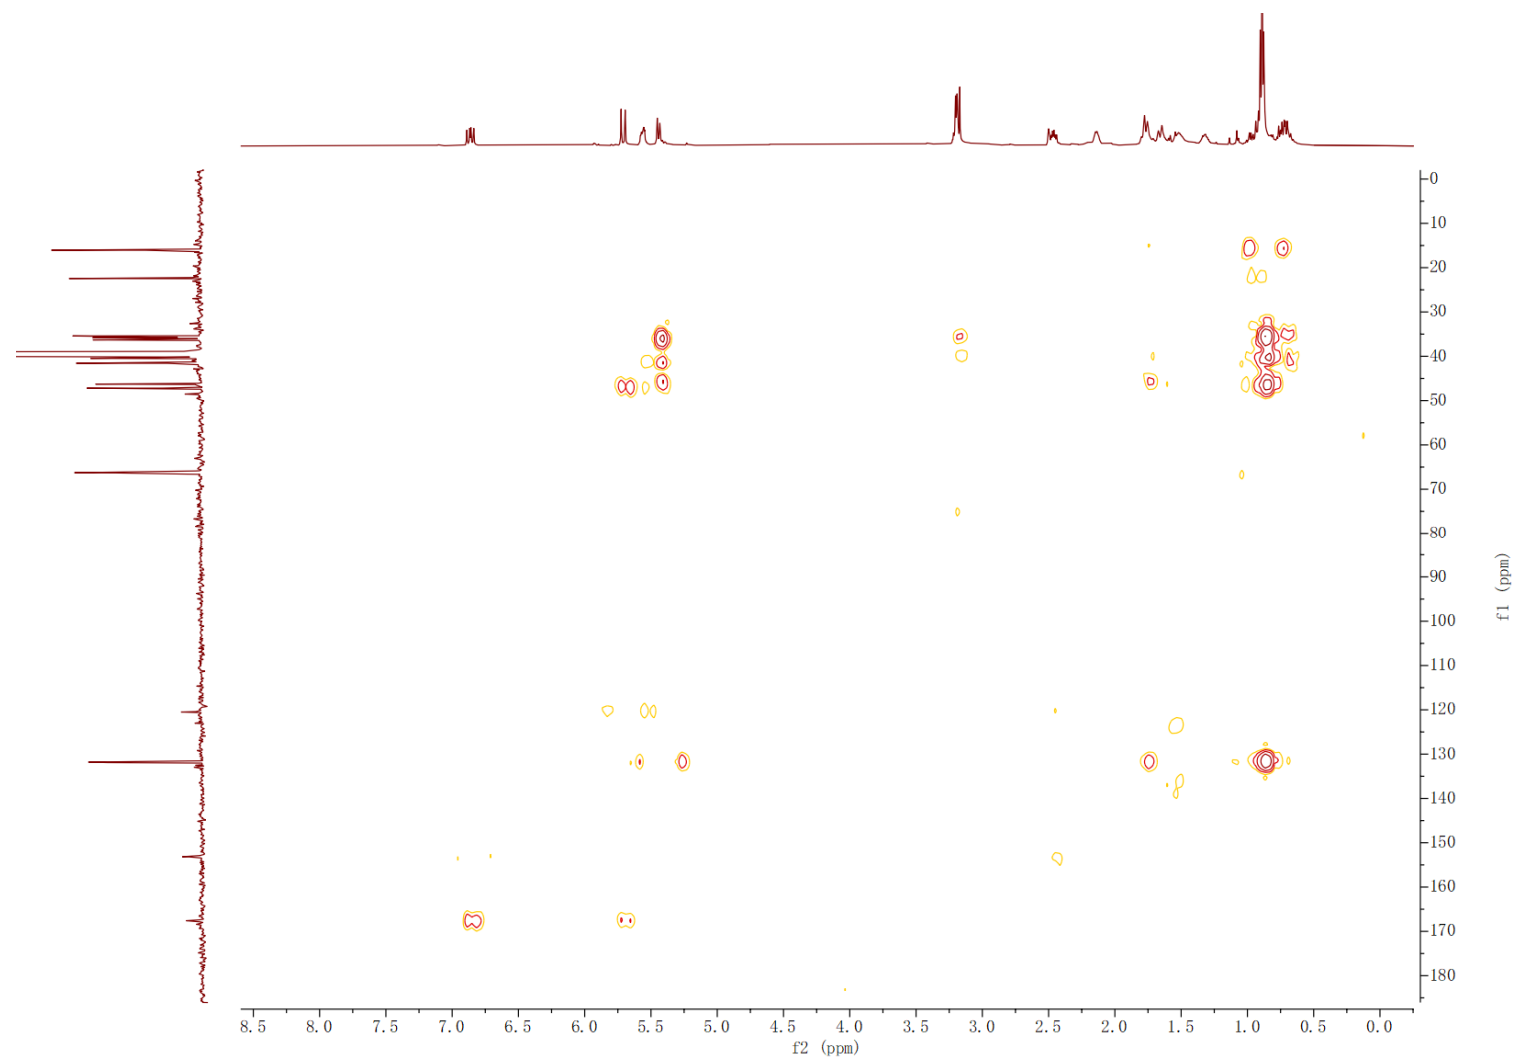



**Figure S21.** NOESY spectrum of compound **3**;

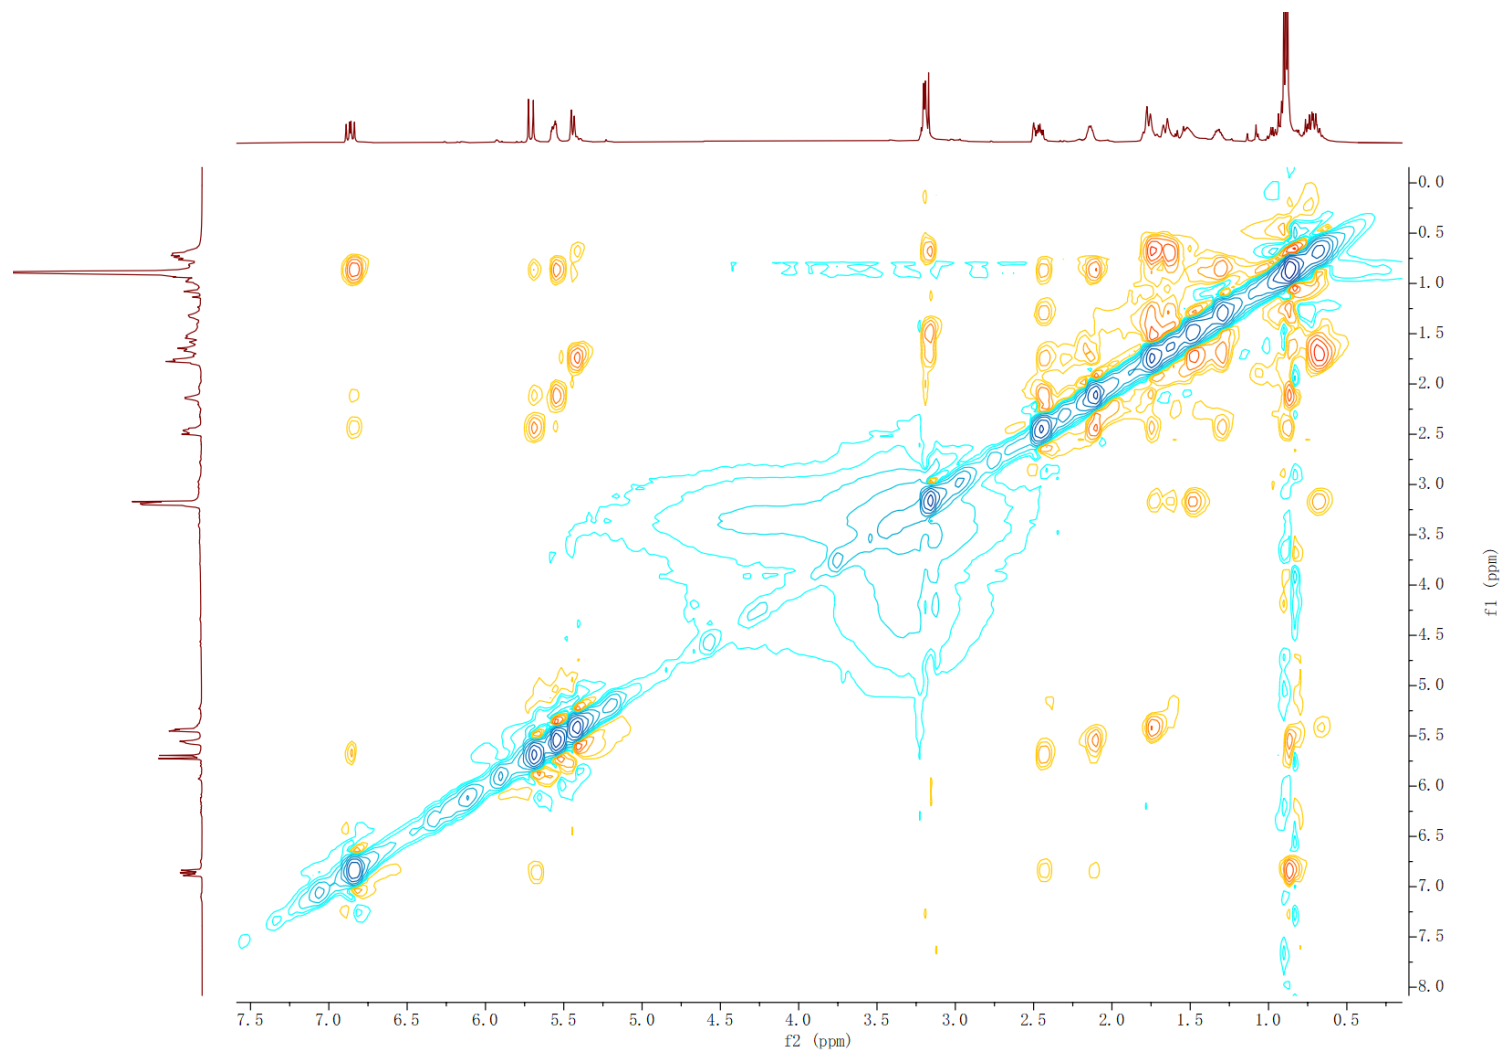

**Figure S22.** HRESI mass spectrum of compound **4**;

20210924-AS324-84\_210924111037 #58 RT: 0.53 AV: 1 NL: 5.48E7  
T: FTMS - p ESI Full ms [150.00-2000.00]

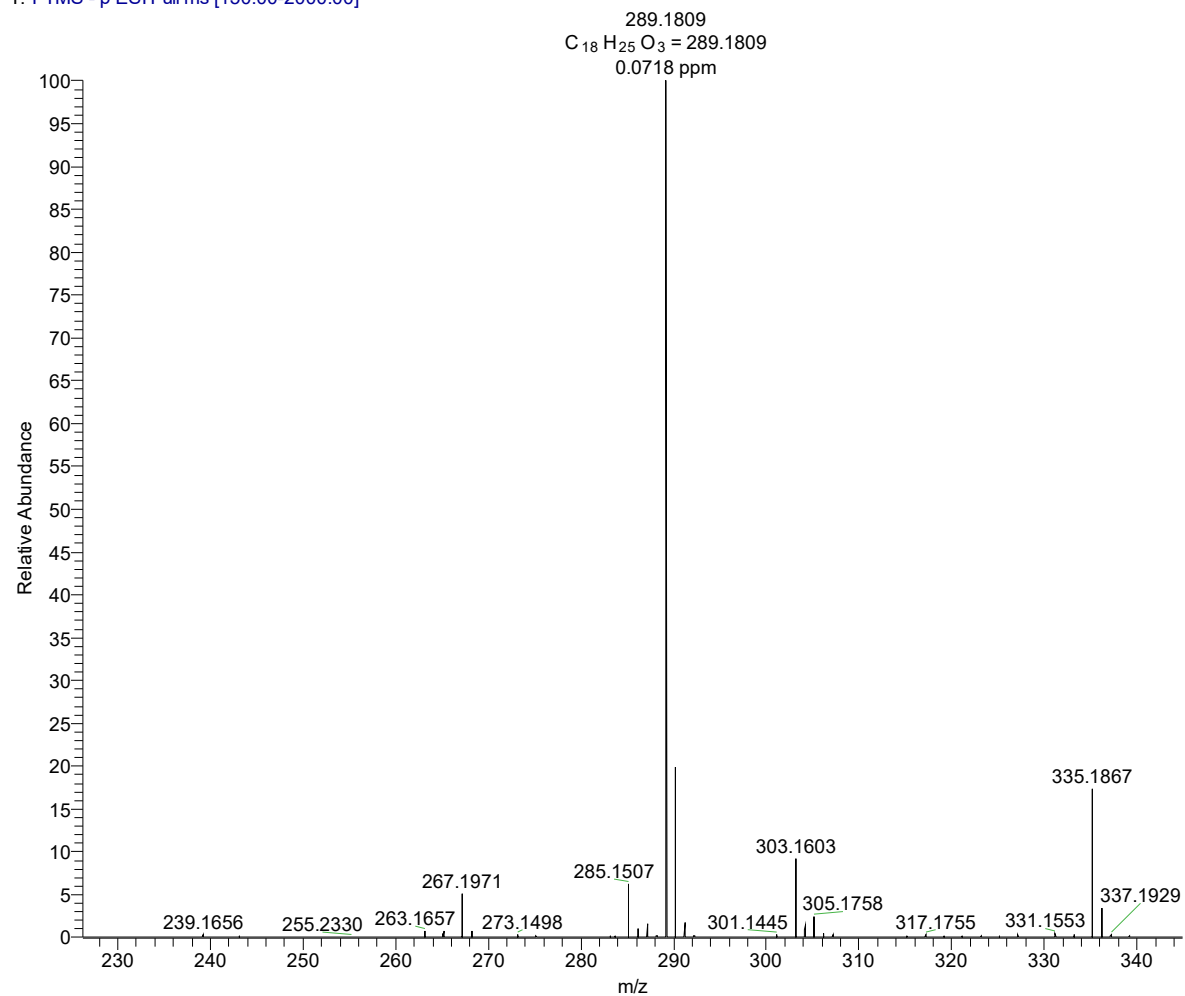

**Figure S23.**  $^1\text{H}$  NMR (500 MHz,  $\text{DMSO}-d_6$ ) spectrum of compound **4**;

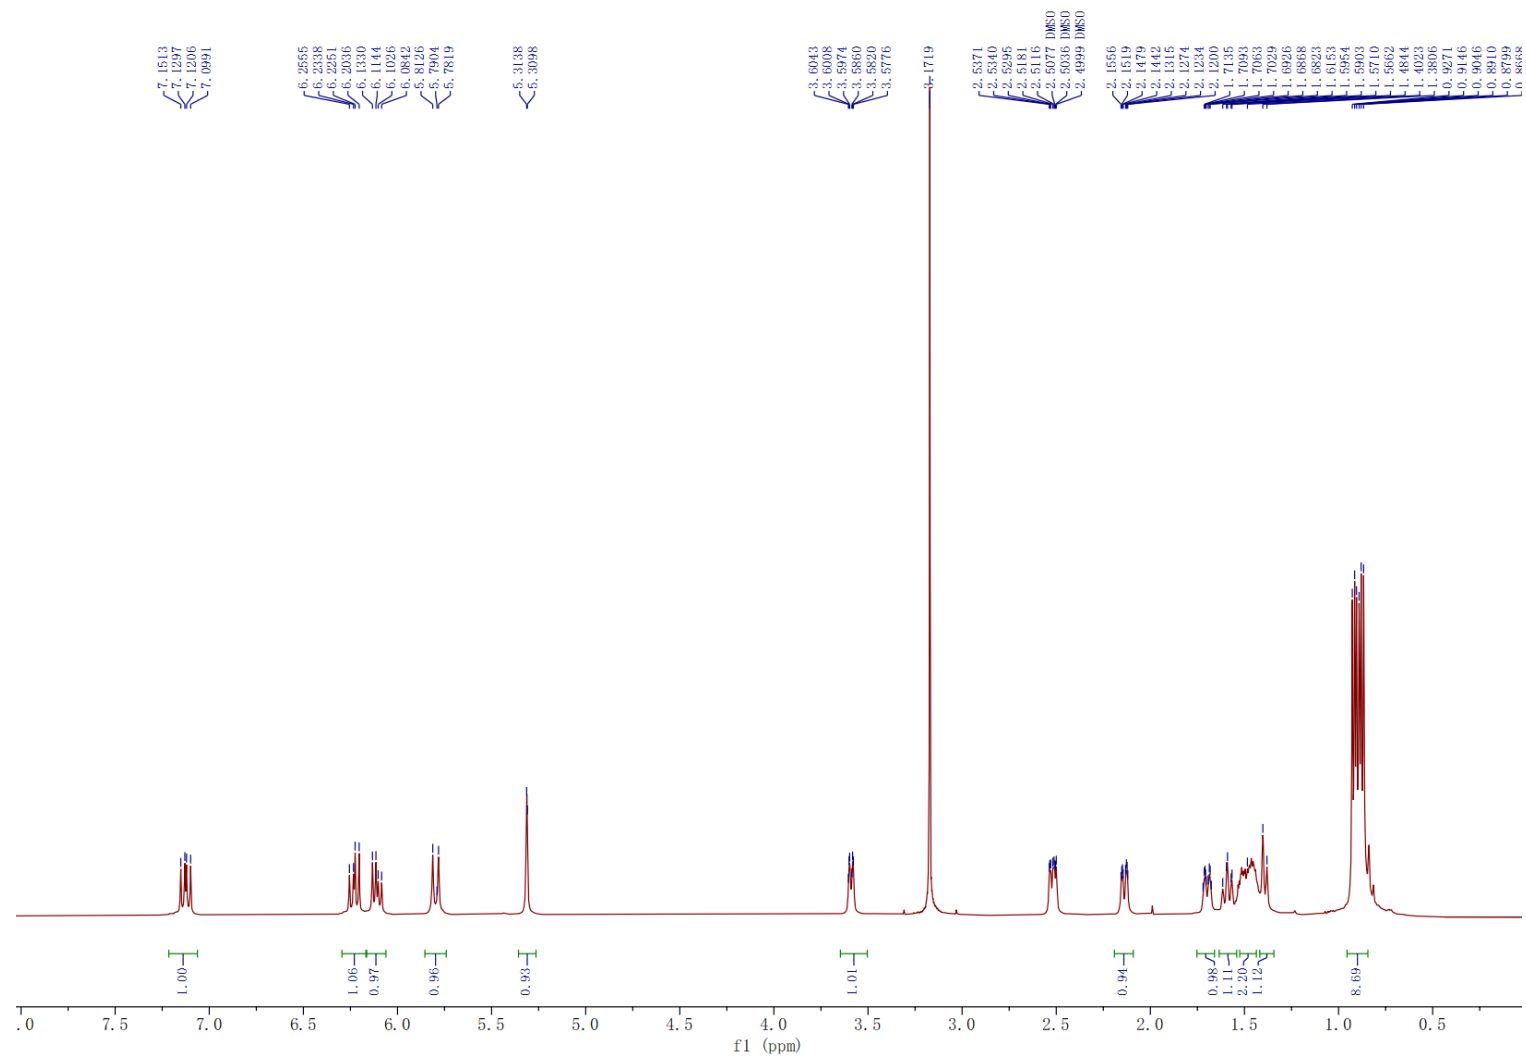

**Figure S24.**  $^{13}\text{C}$  NMR (125 MHz,  $\text{DMSO-}d_6$ ) and DEPT spectra of compound **4**;

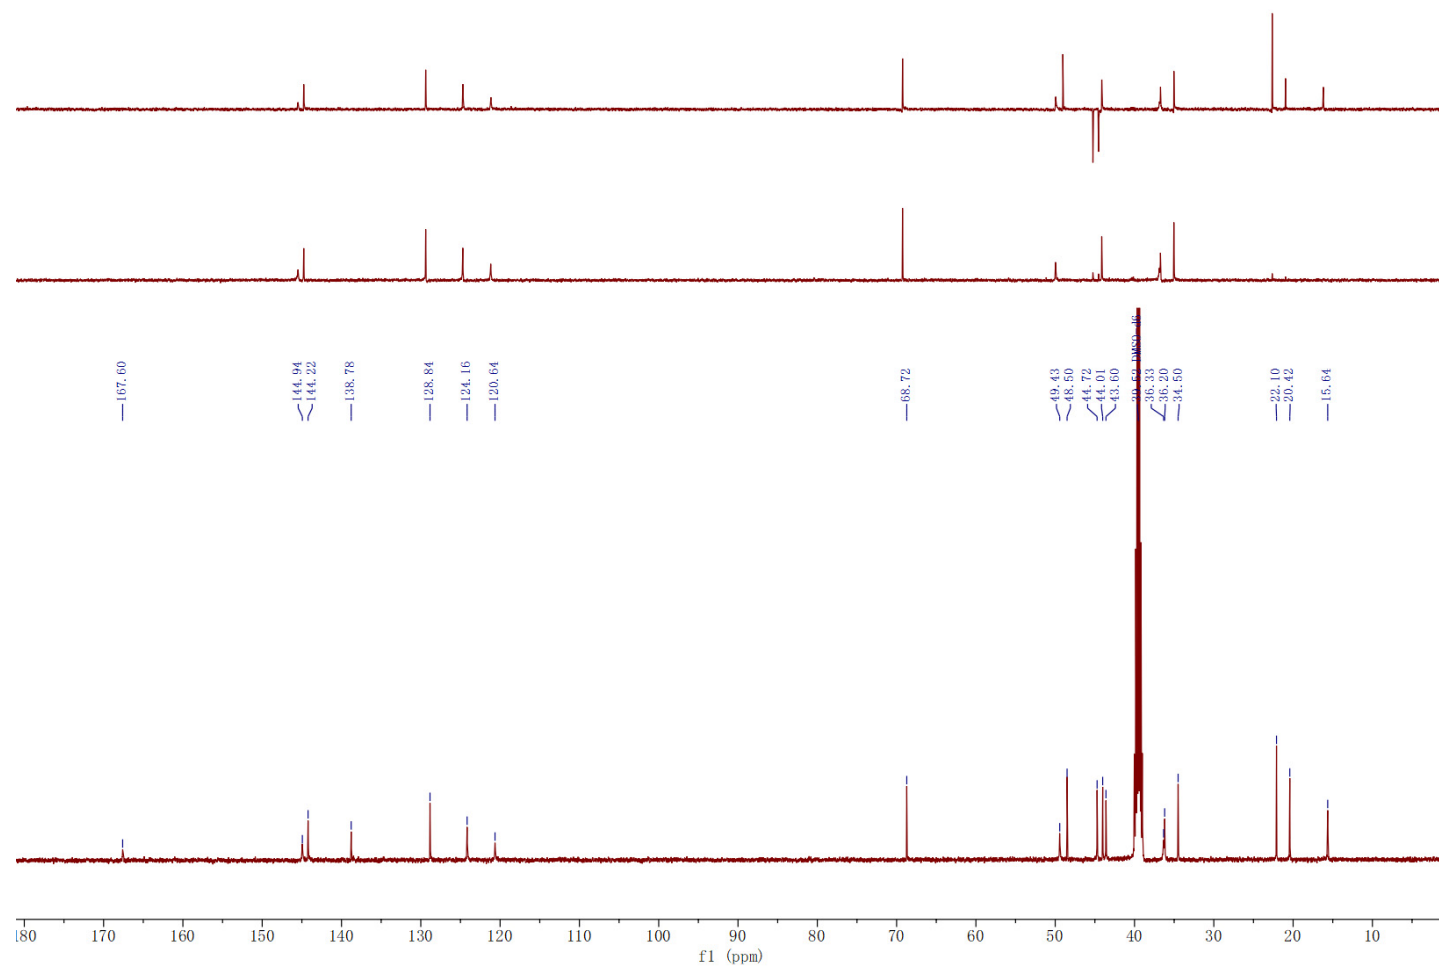

**Figure S25.** COSY spectrum of compound **4**;

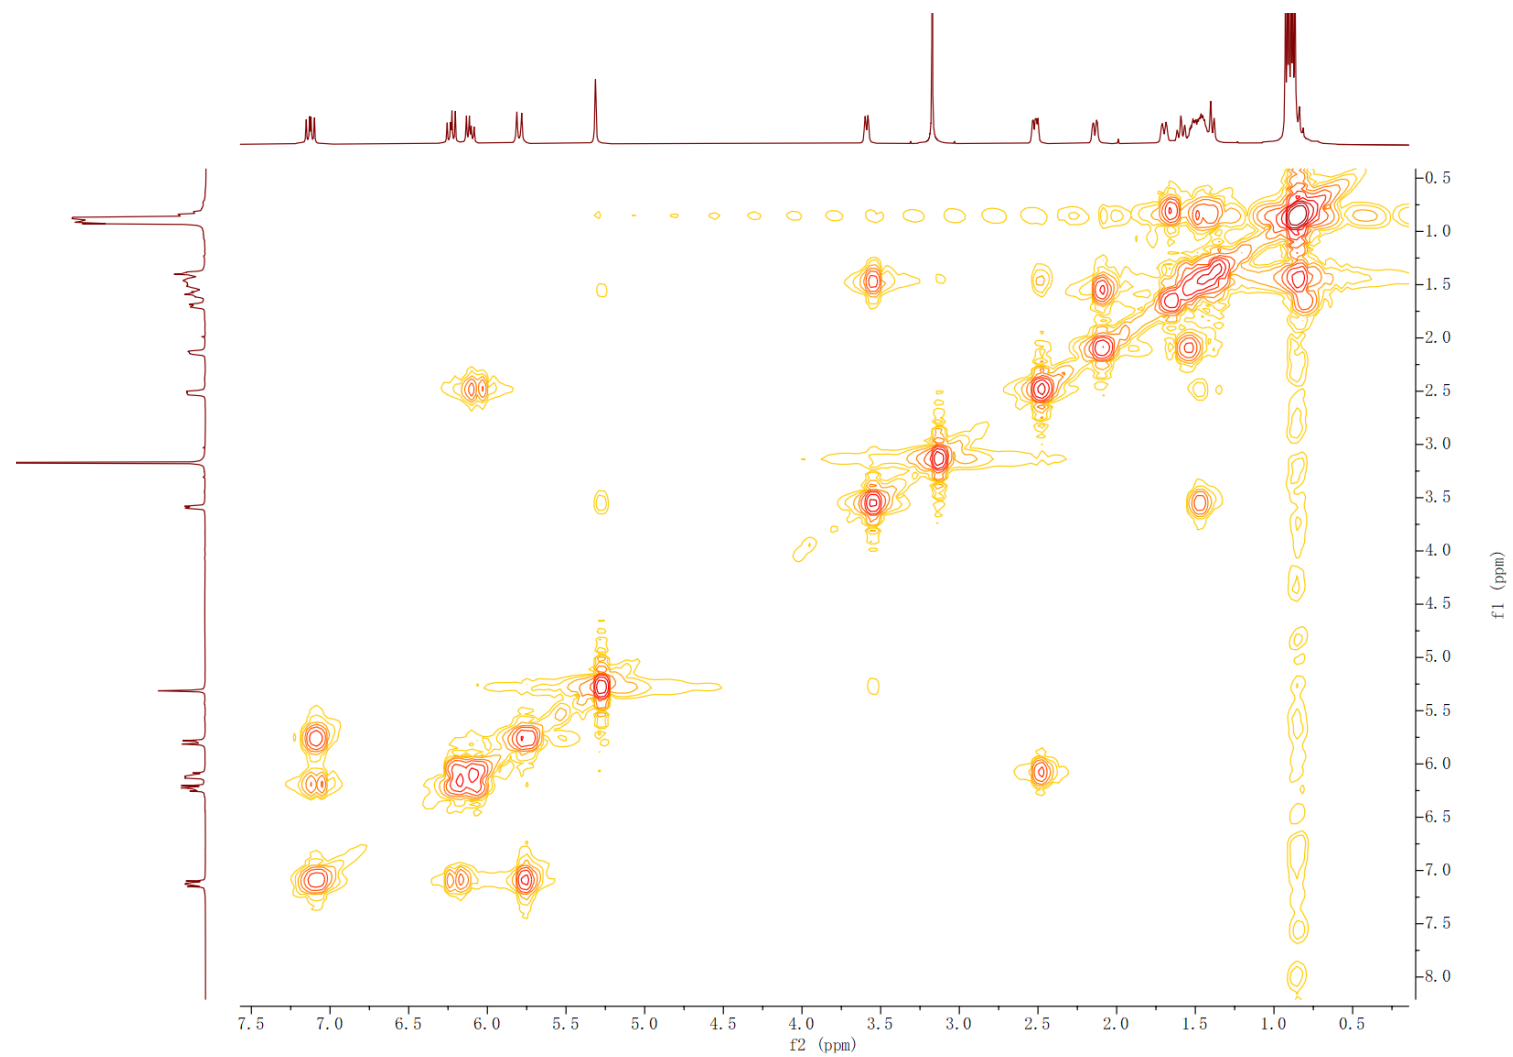

**Figure S26.** HSQC spectrum of compound **4**;

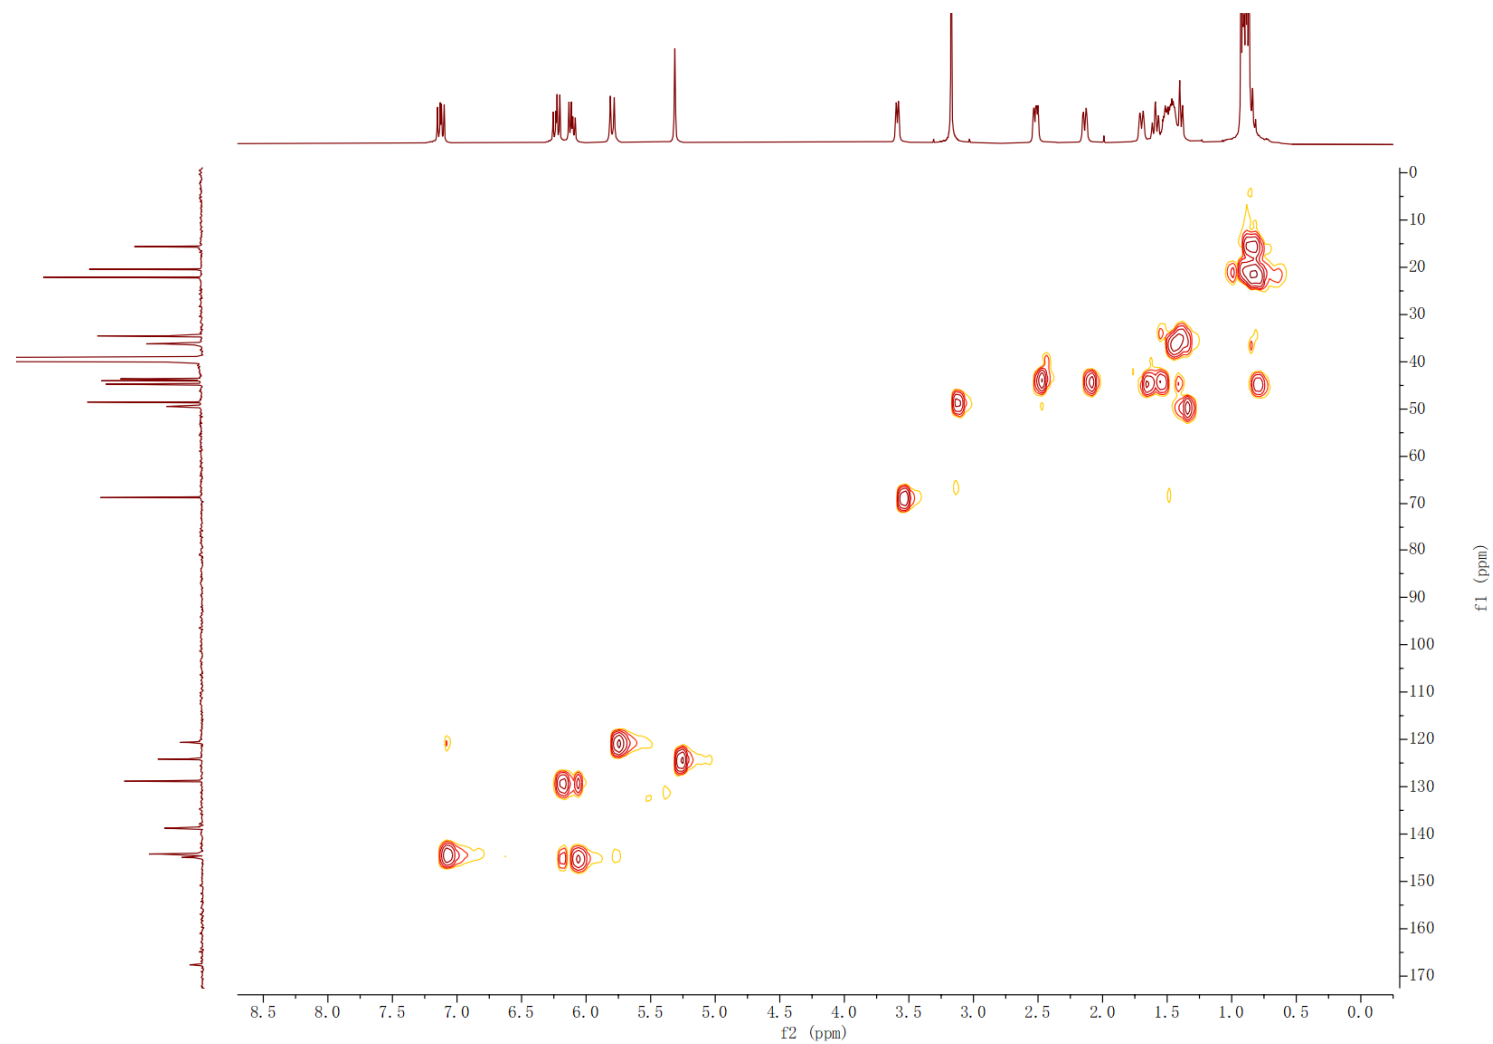

**Figure S27.** HMBC spectrum of compound **4**;

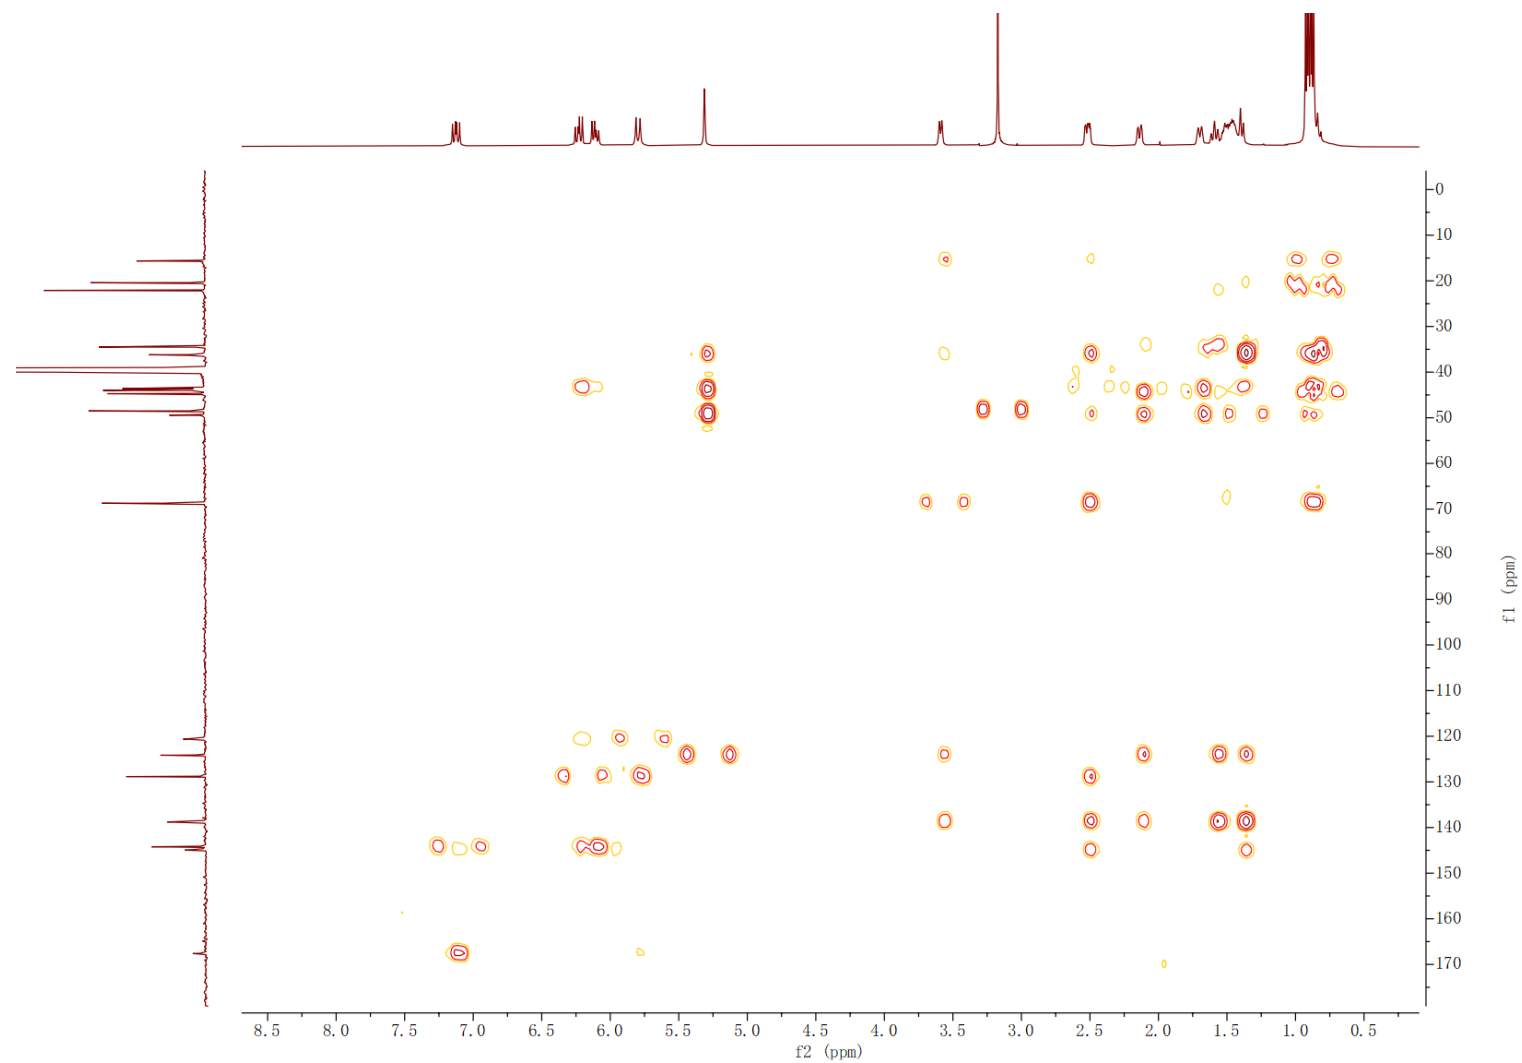

**Figure S28.** NOESY spectrum of compound **4**;

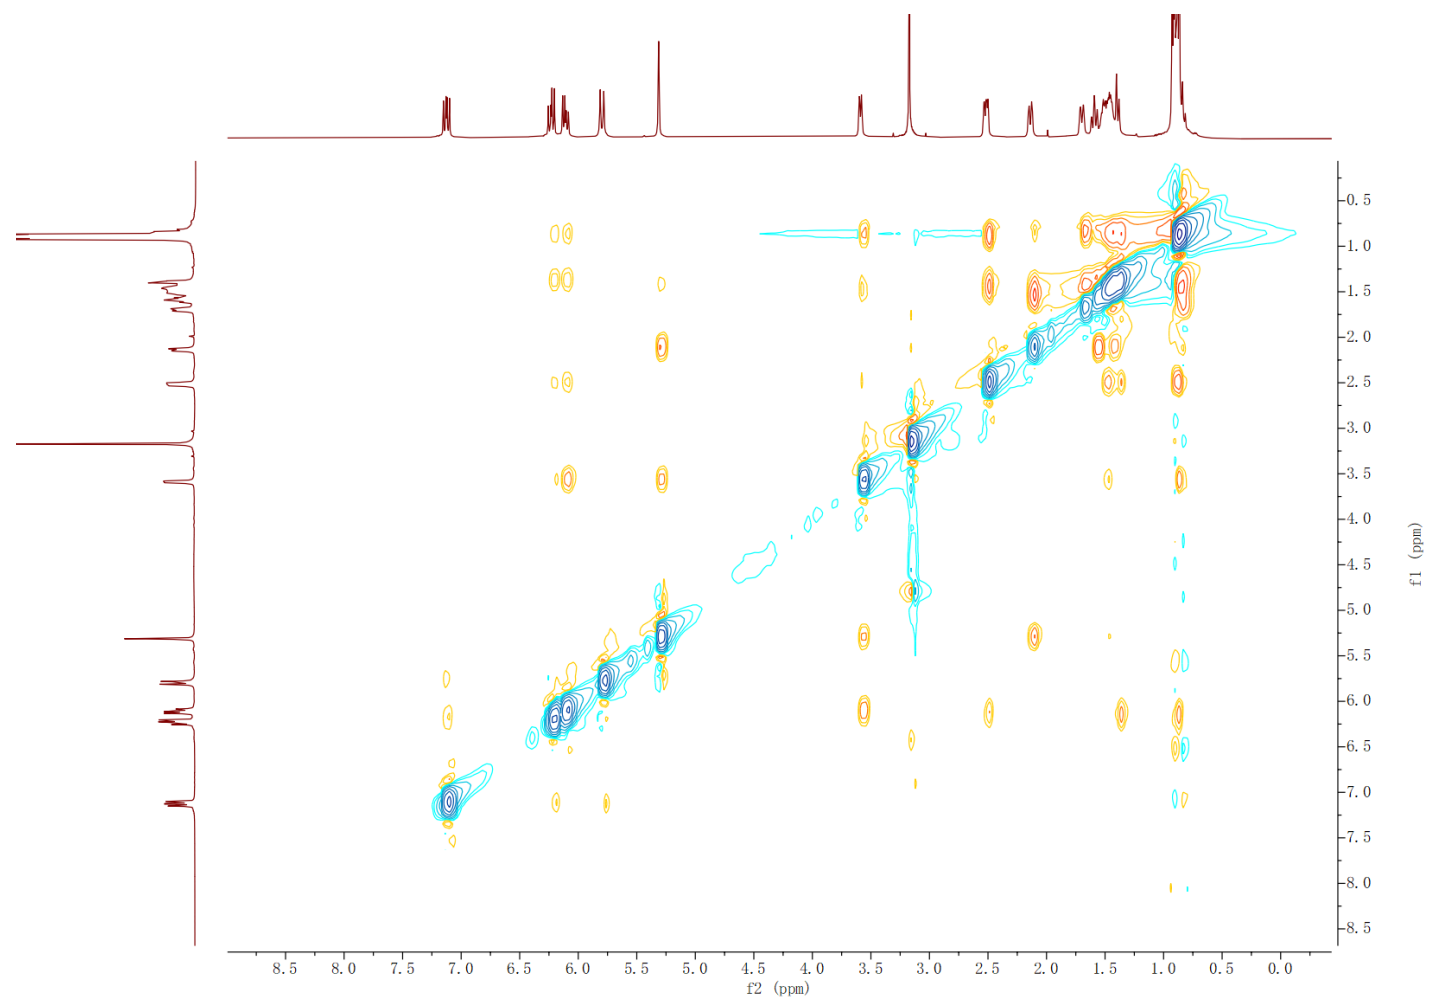



**Figure S29.** HRESI mass spectrum of compound **5**;

20210114-AS324-21\_210114081104 #33-34 RT: 0.65-0.67 AV: 2 NL: 5.47E6  
T: FTMS - p ESI Full ms [150.00-1000.00]

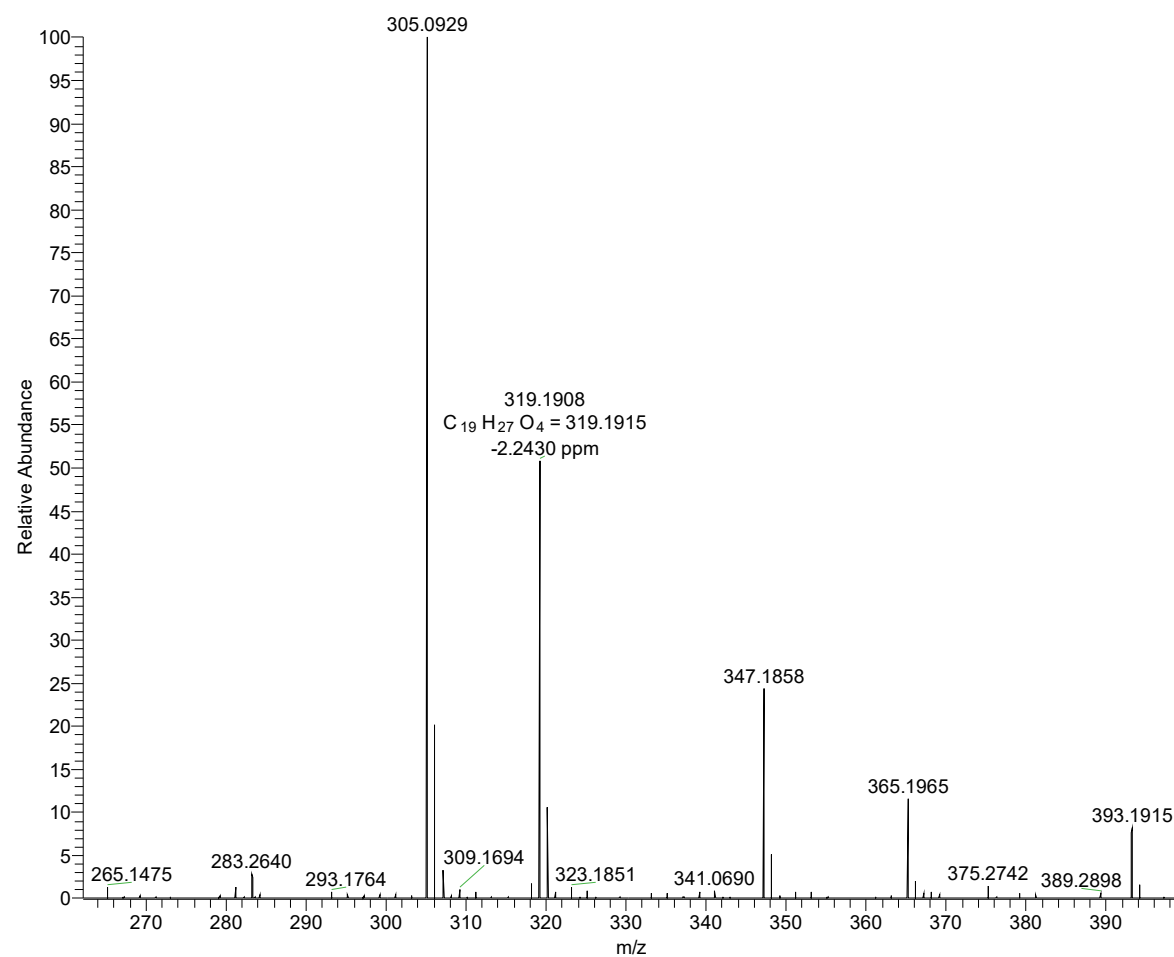

**Figure S30.**  $^1\text{H}$  NMR (500 MHz,  $\text{DMSO}-d_6$ ) spectrum of compound **5**;

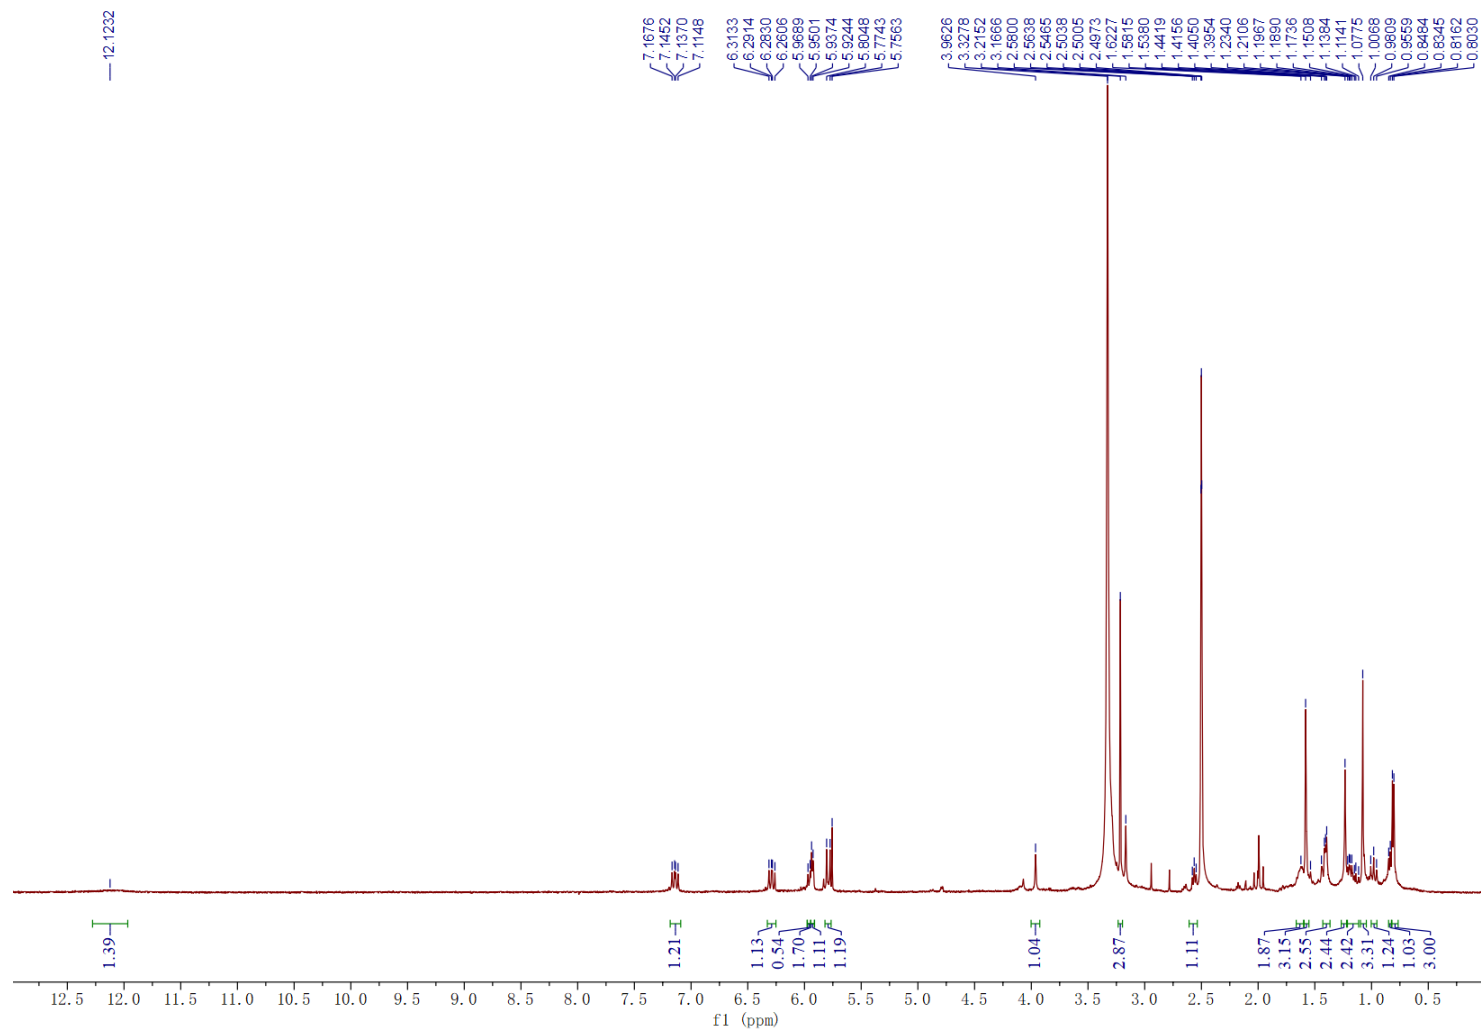

**Figure S31.**  $^{13}\text{C}$  NMR (125 MHz,  $\text{DMSO-}d_6$ ) and DEPT spectra of compound **5**;

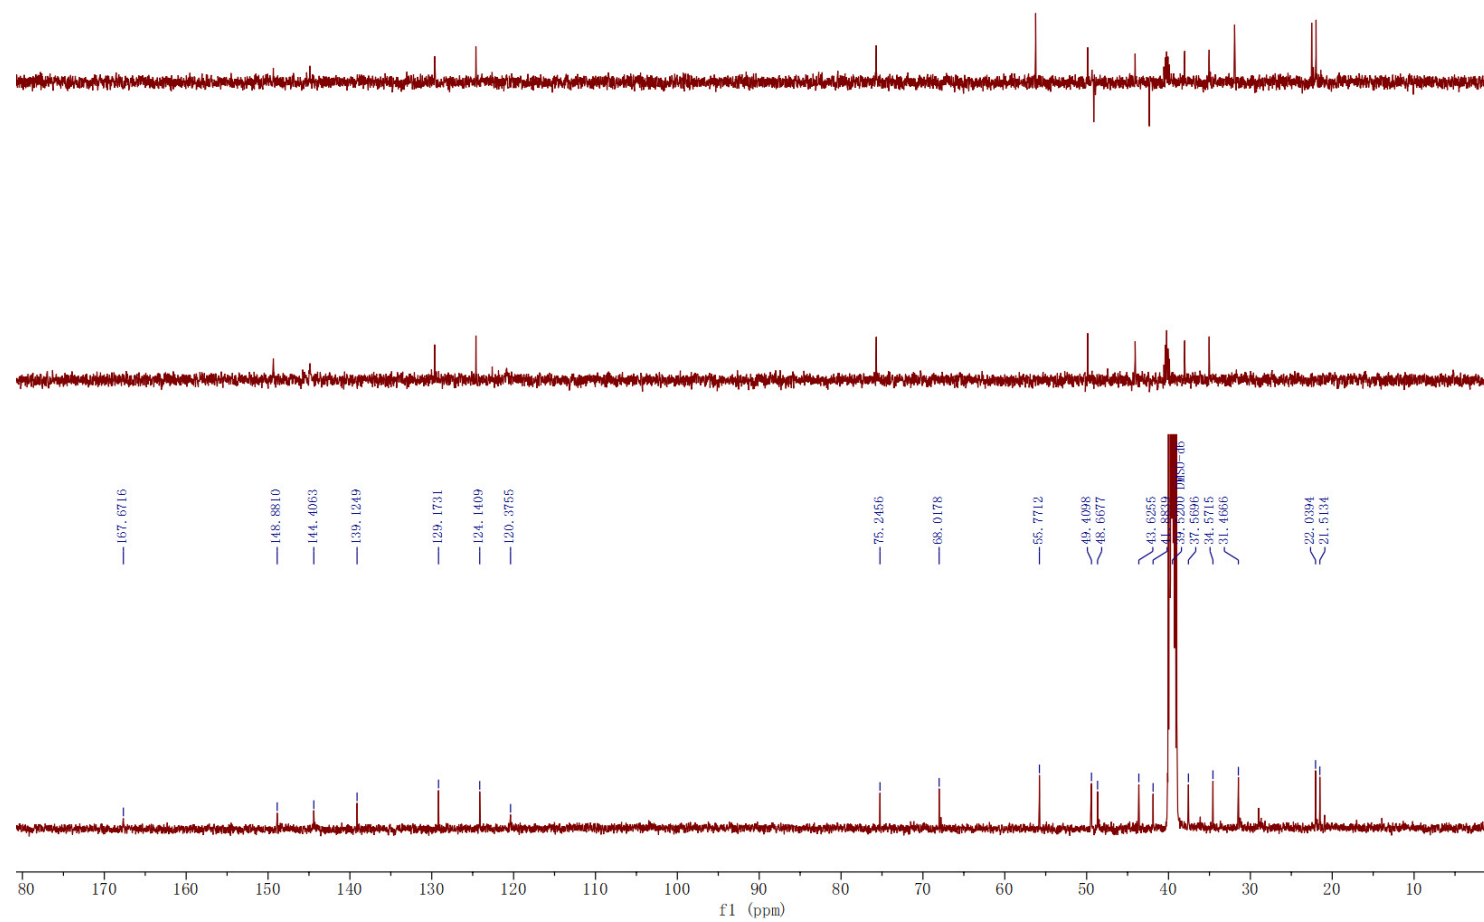

**Figure S32.** COSY spectrum of compound **5**;

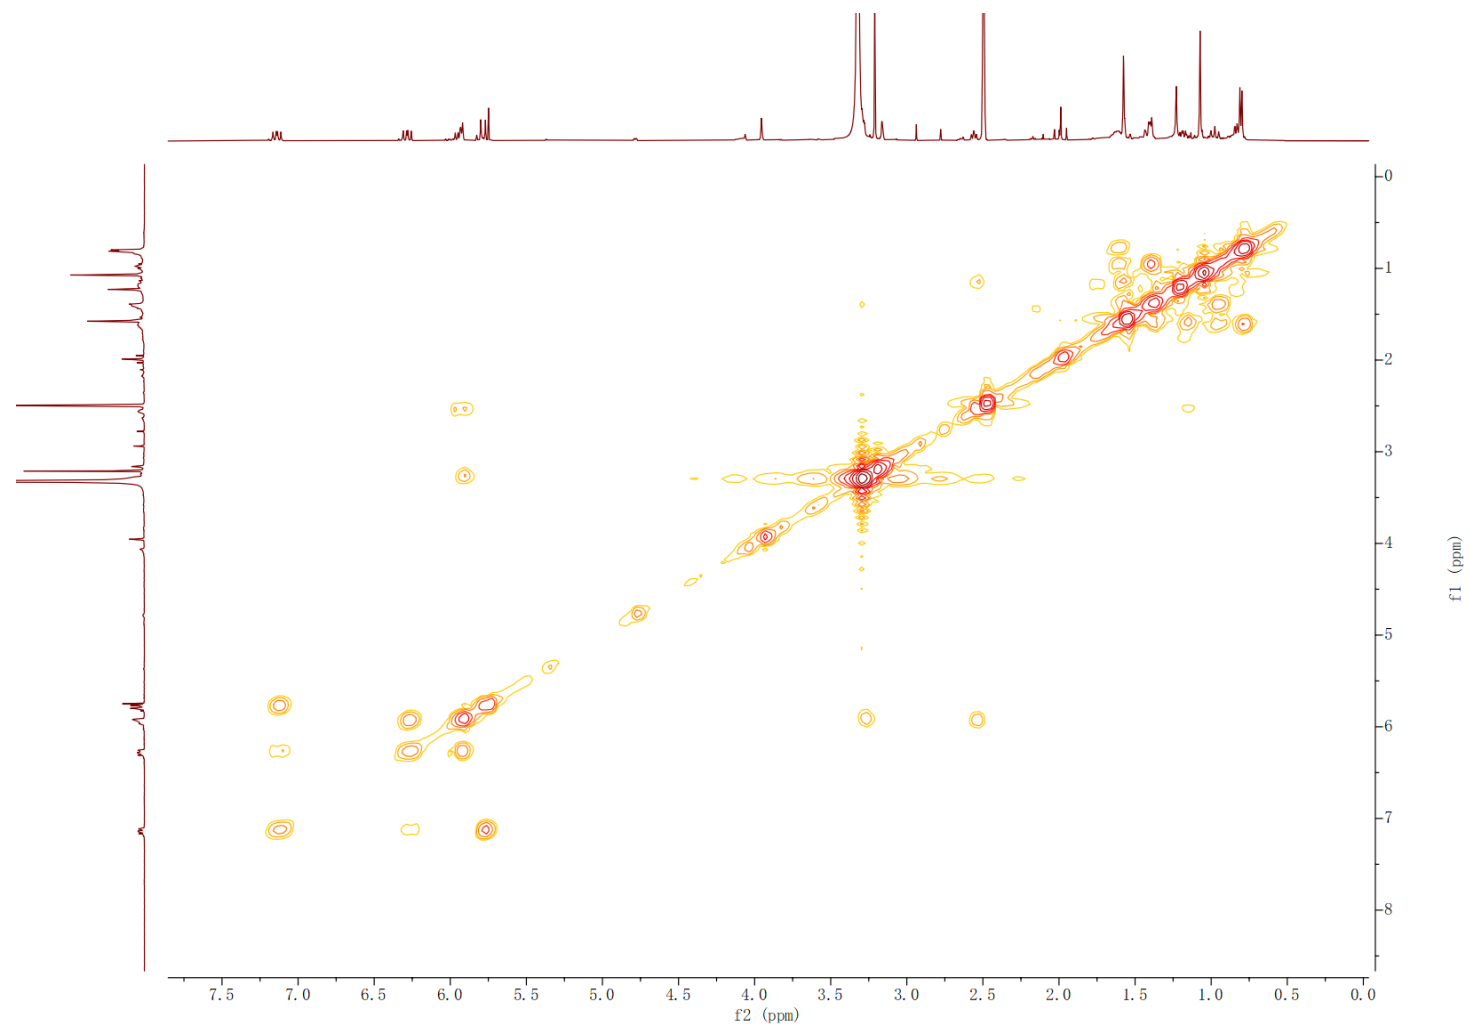

**Figure S33.** HSQC spectrum of compound **5**;

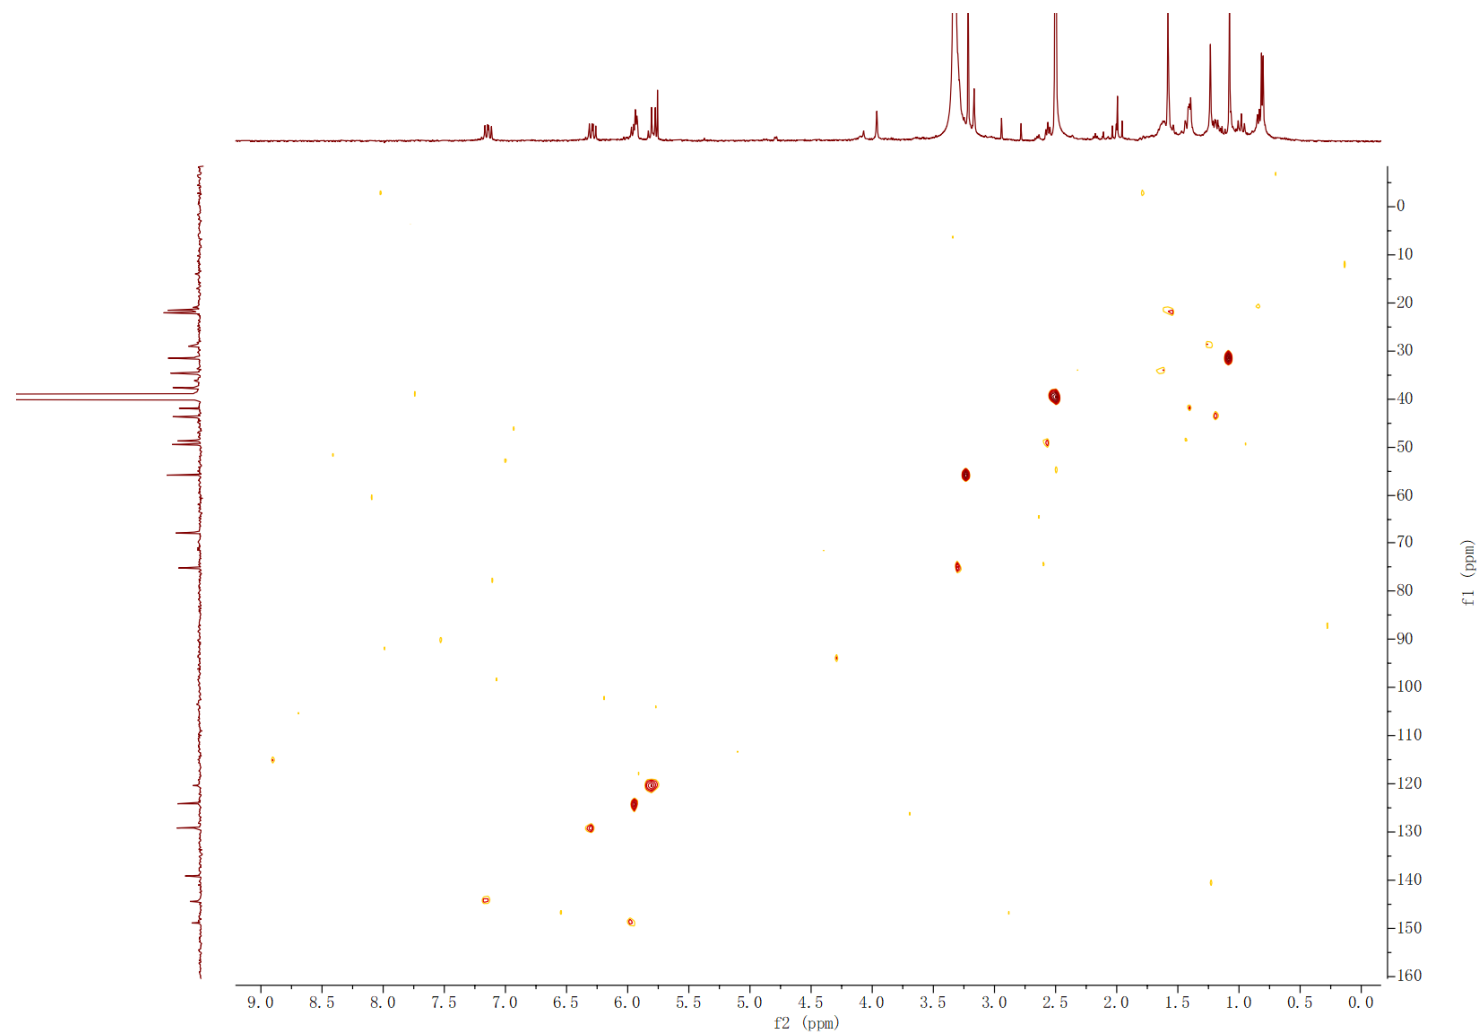

**Figure S34.** HMBC spectrum of compound **5**;

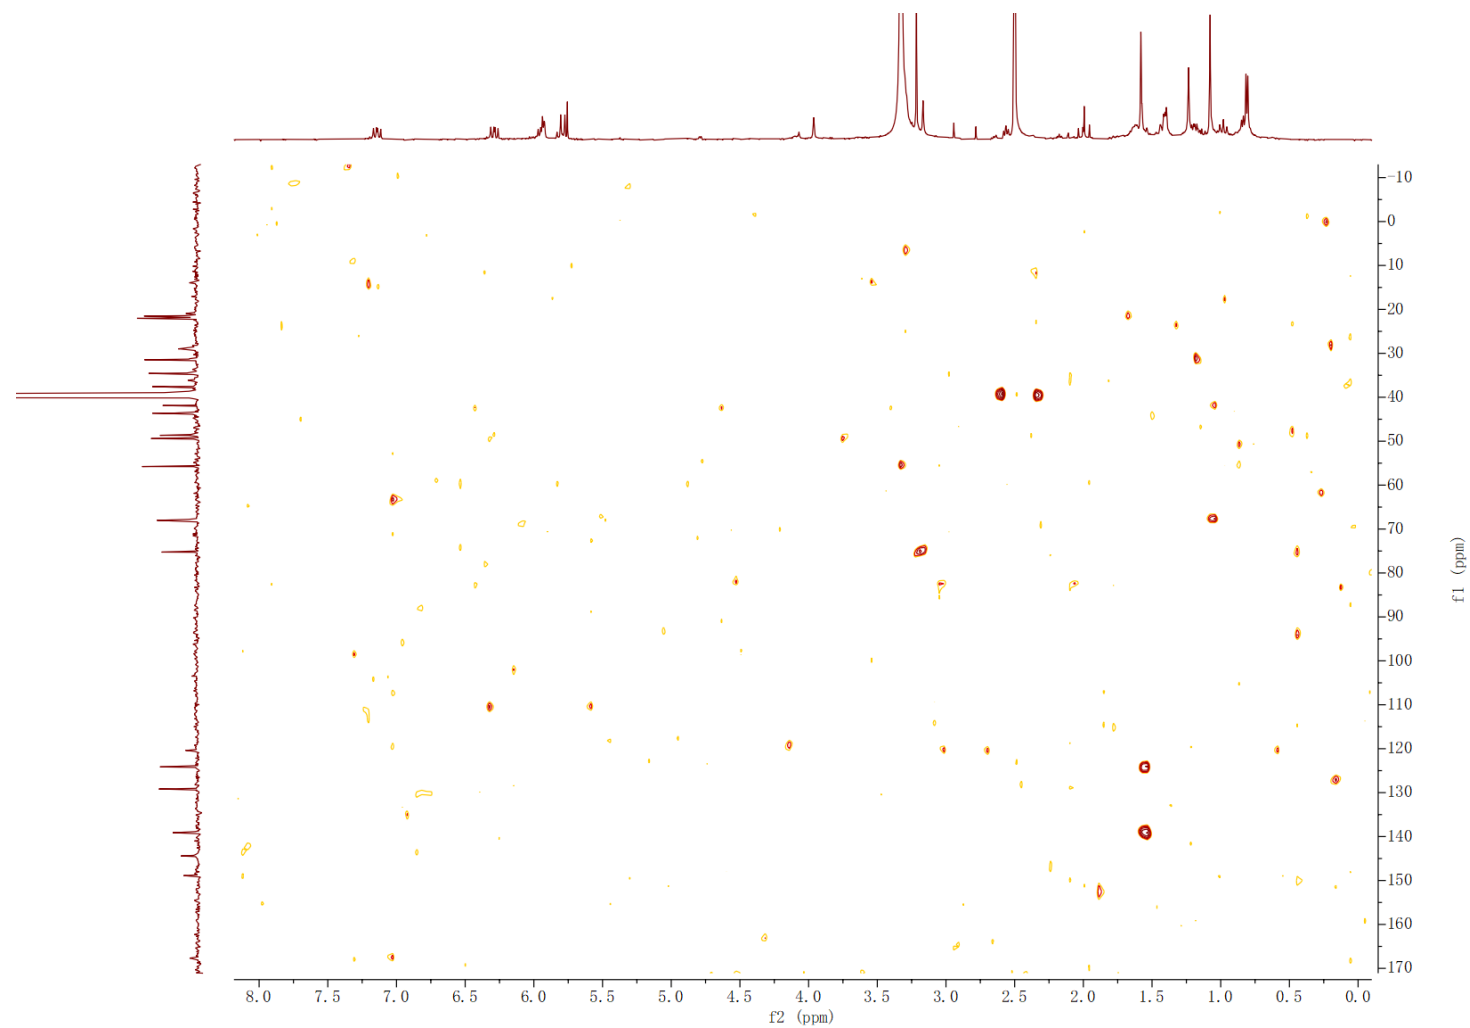

**Figure S35.** NOESY spectrum of compound **5**;

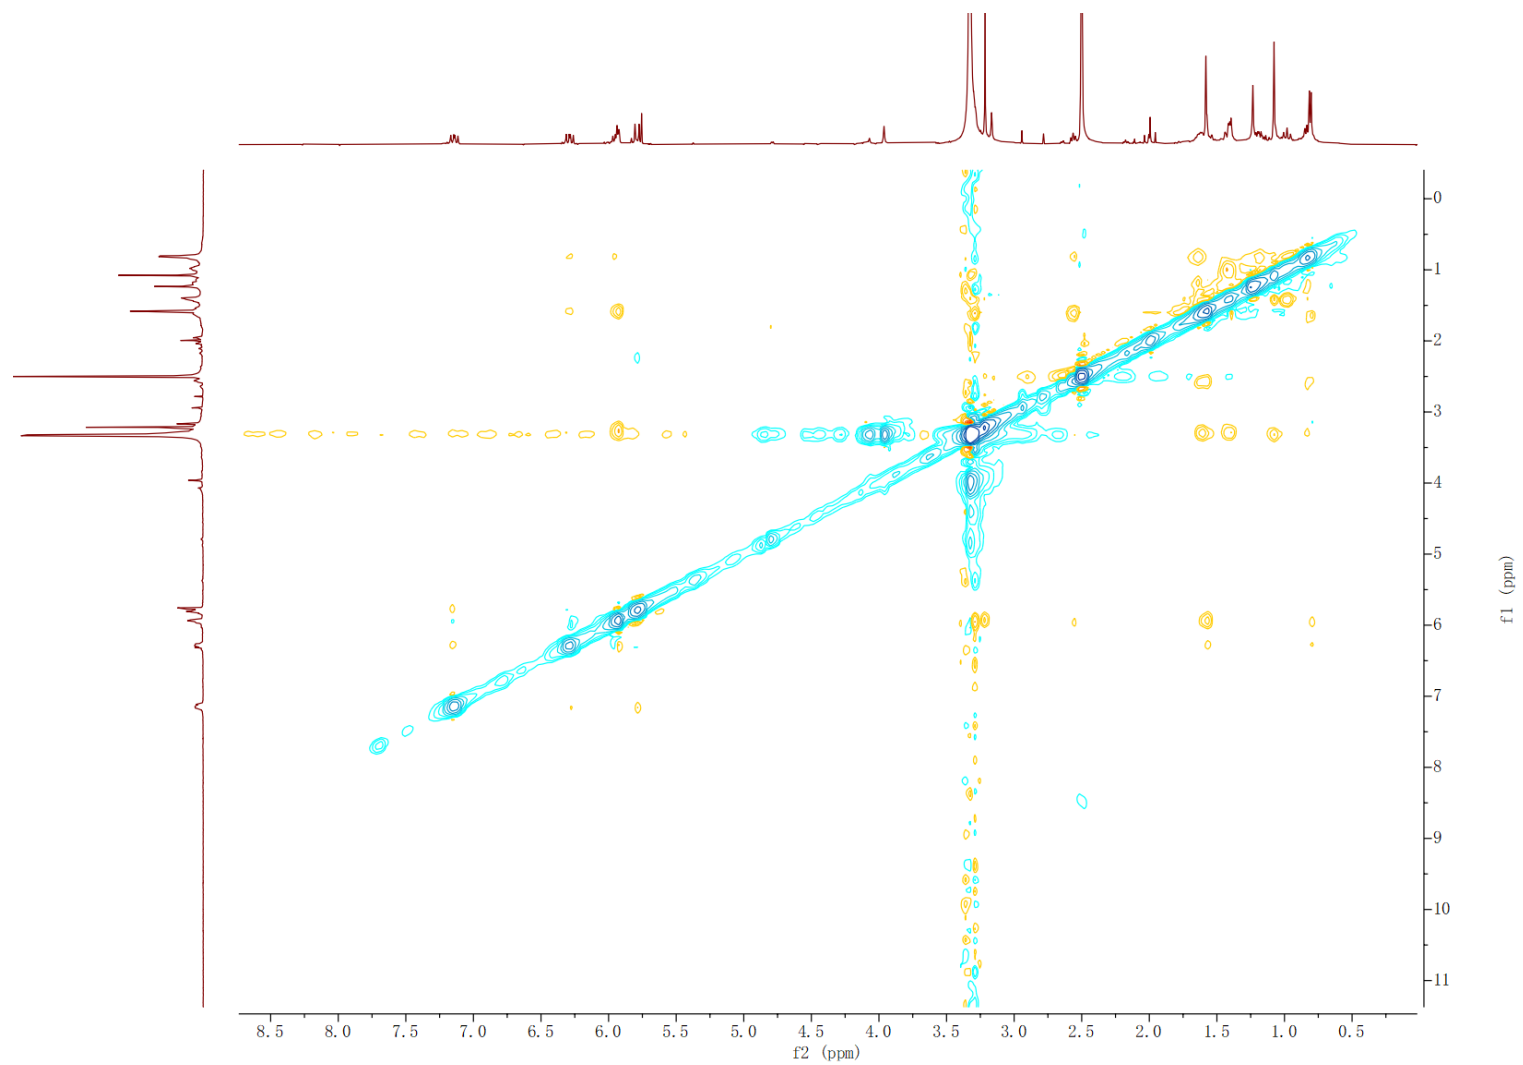

**Figure S36.** HRESI mass spectrum of compound **6**;

20210412-AS324-39\_210412103730 #60 RT: 0.83 AV: 1 NL: 6.28E6  
T: FTMS - p ESI Full ms [150.00-1000.00]

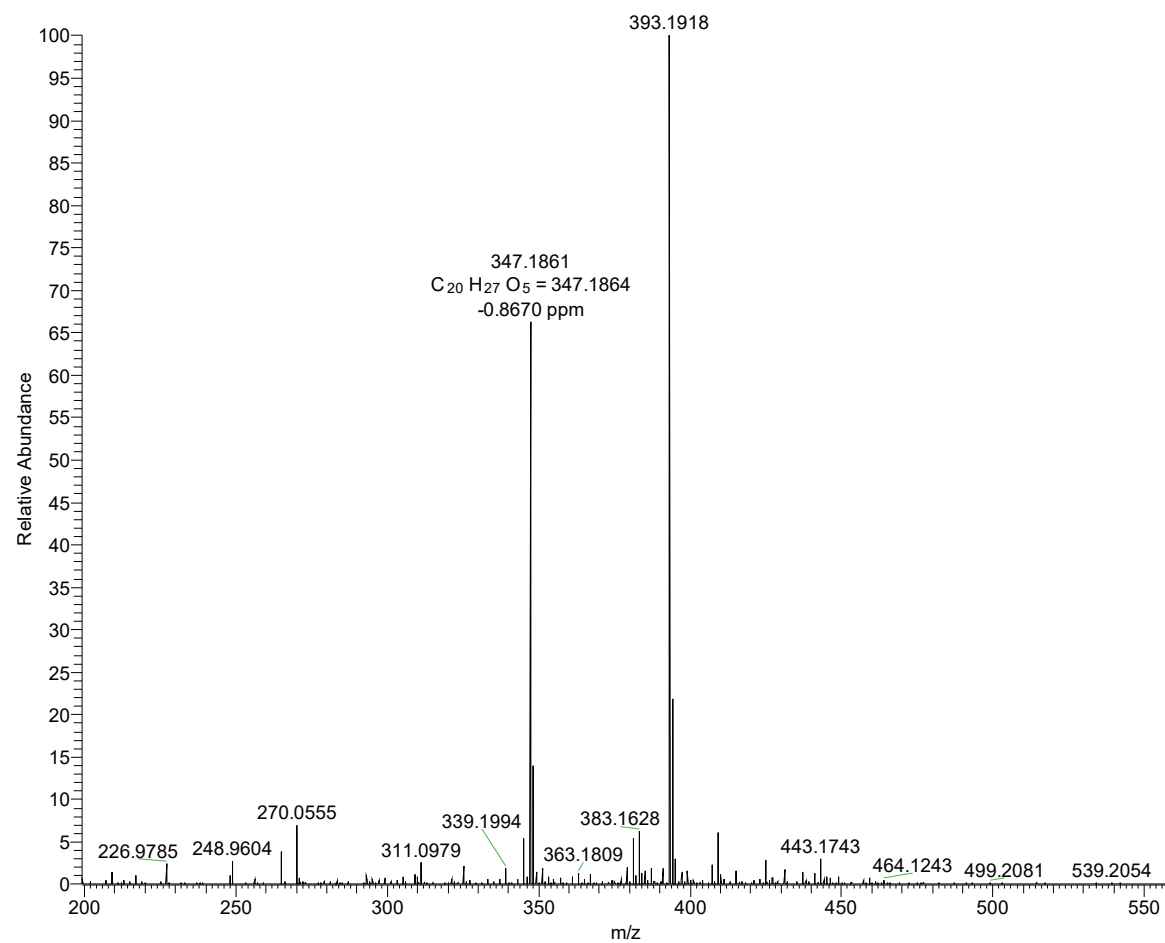



**Figure S37.**  $^1\text{H}$  NMR (500 MHz,  $\text{DMSO}-d_6$ ) spectrum of compound **6**;

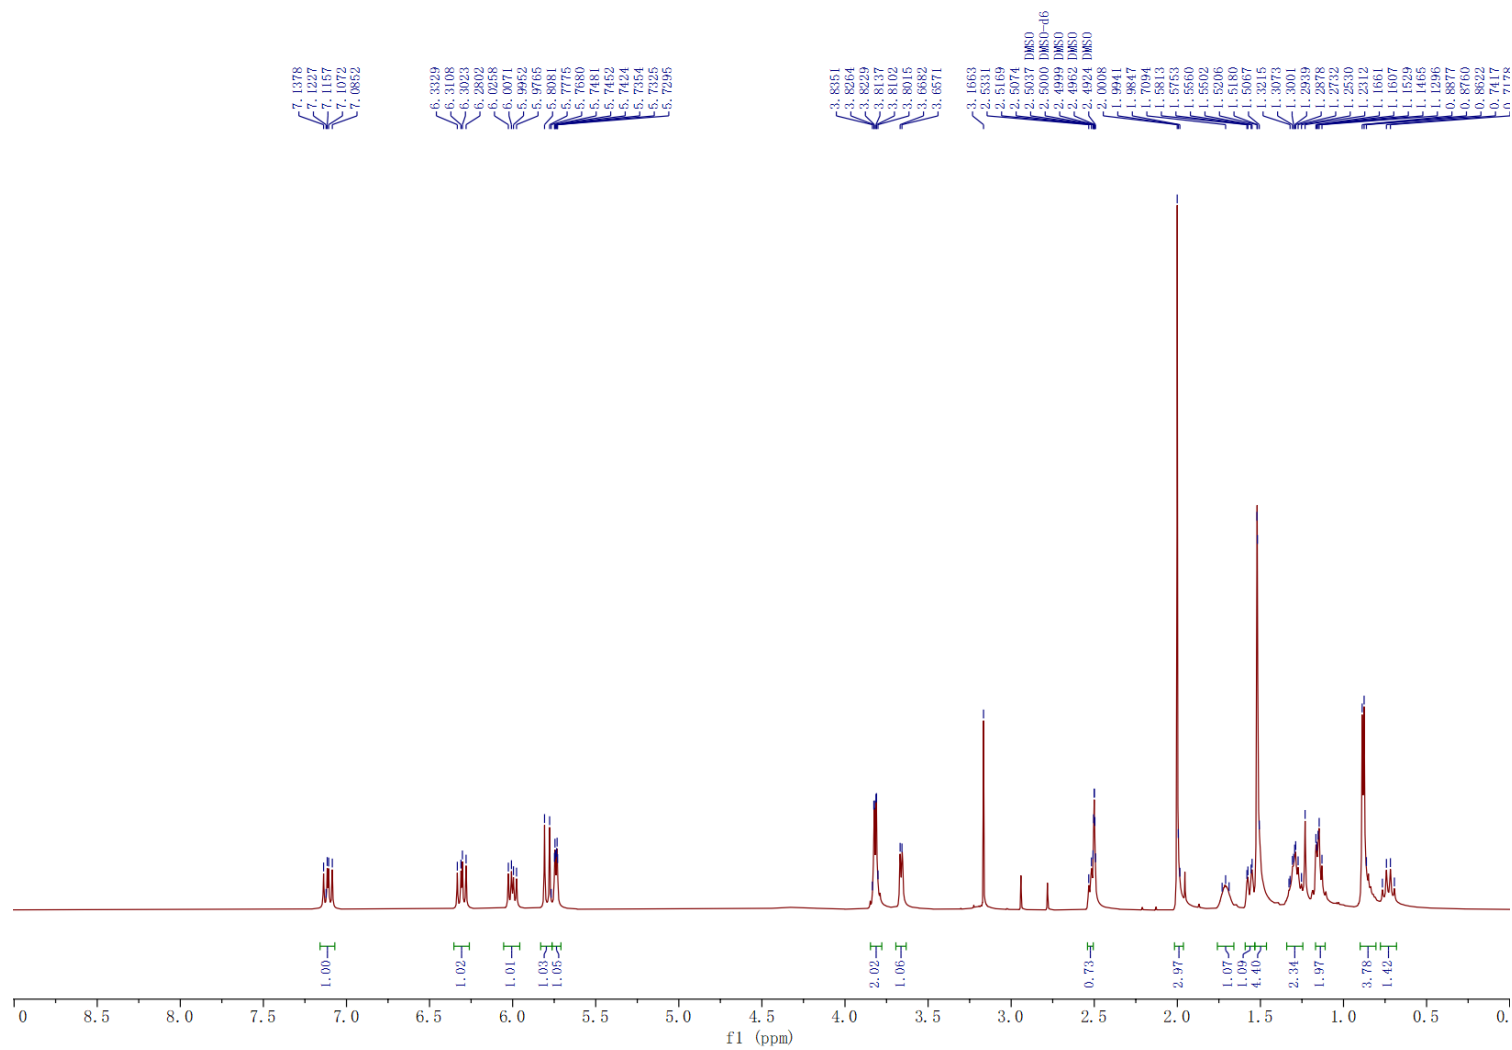

**Figure S38.**  $^{13}\text{C}$  NMR (125 MHz,  $\text{DMSO-}d_6$ ) and DEPT spectra of compound **6**;

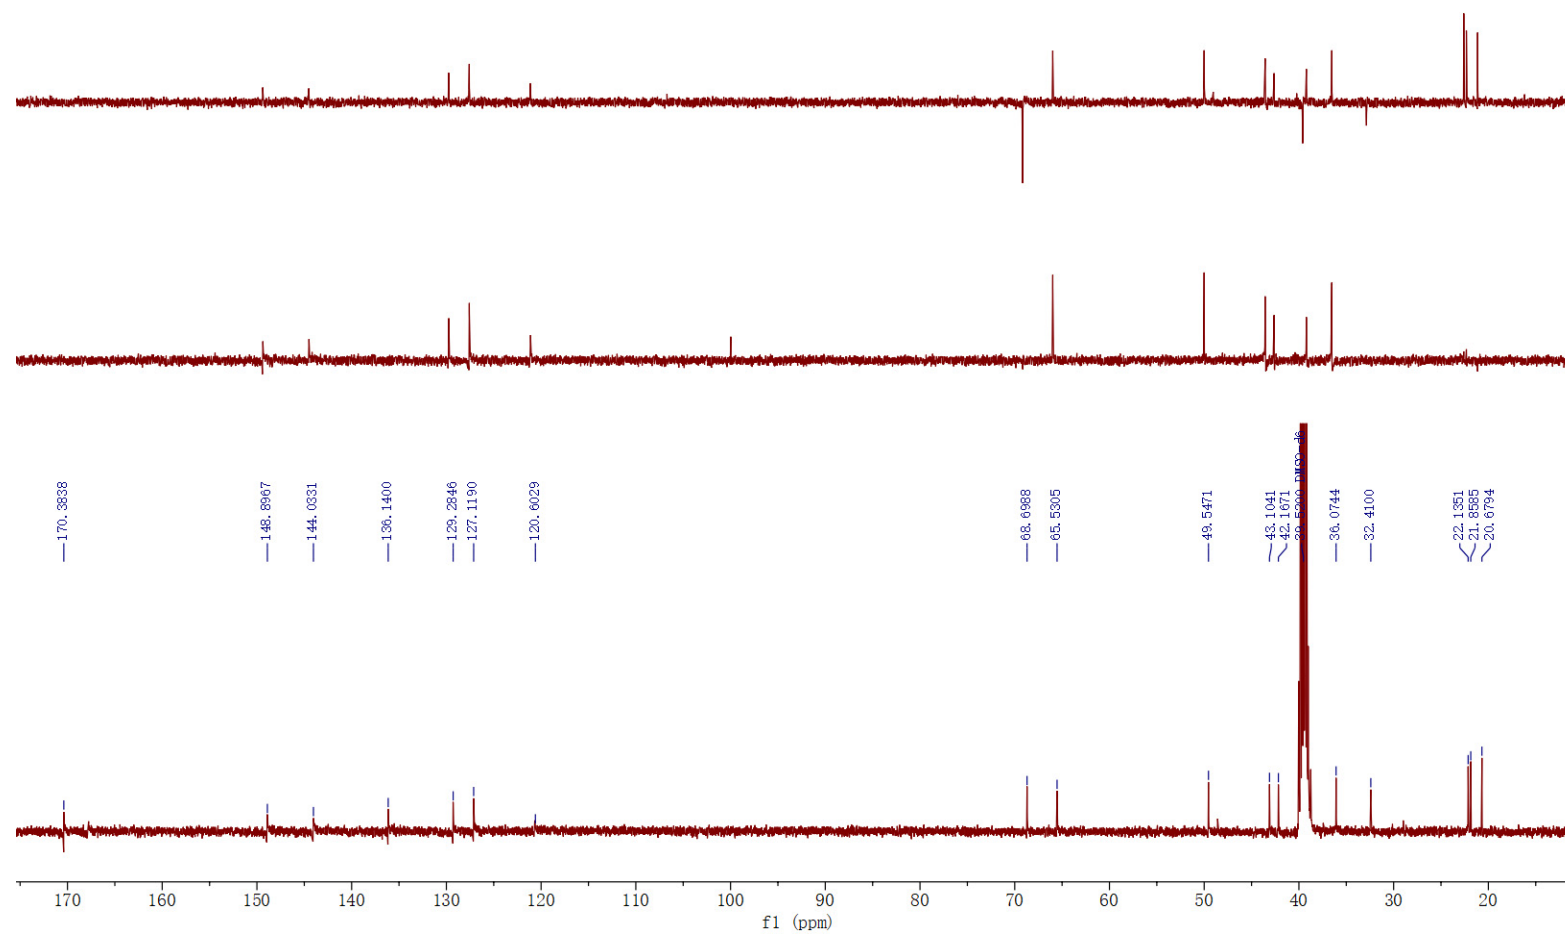

**Figure S39.** COSY spectrum of compound **6**;

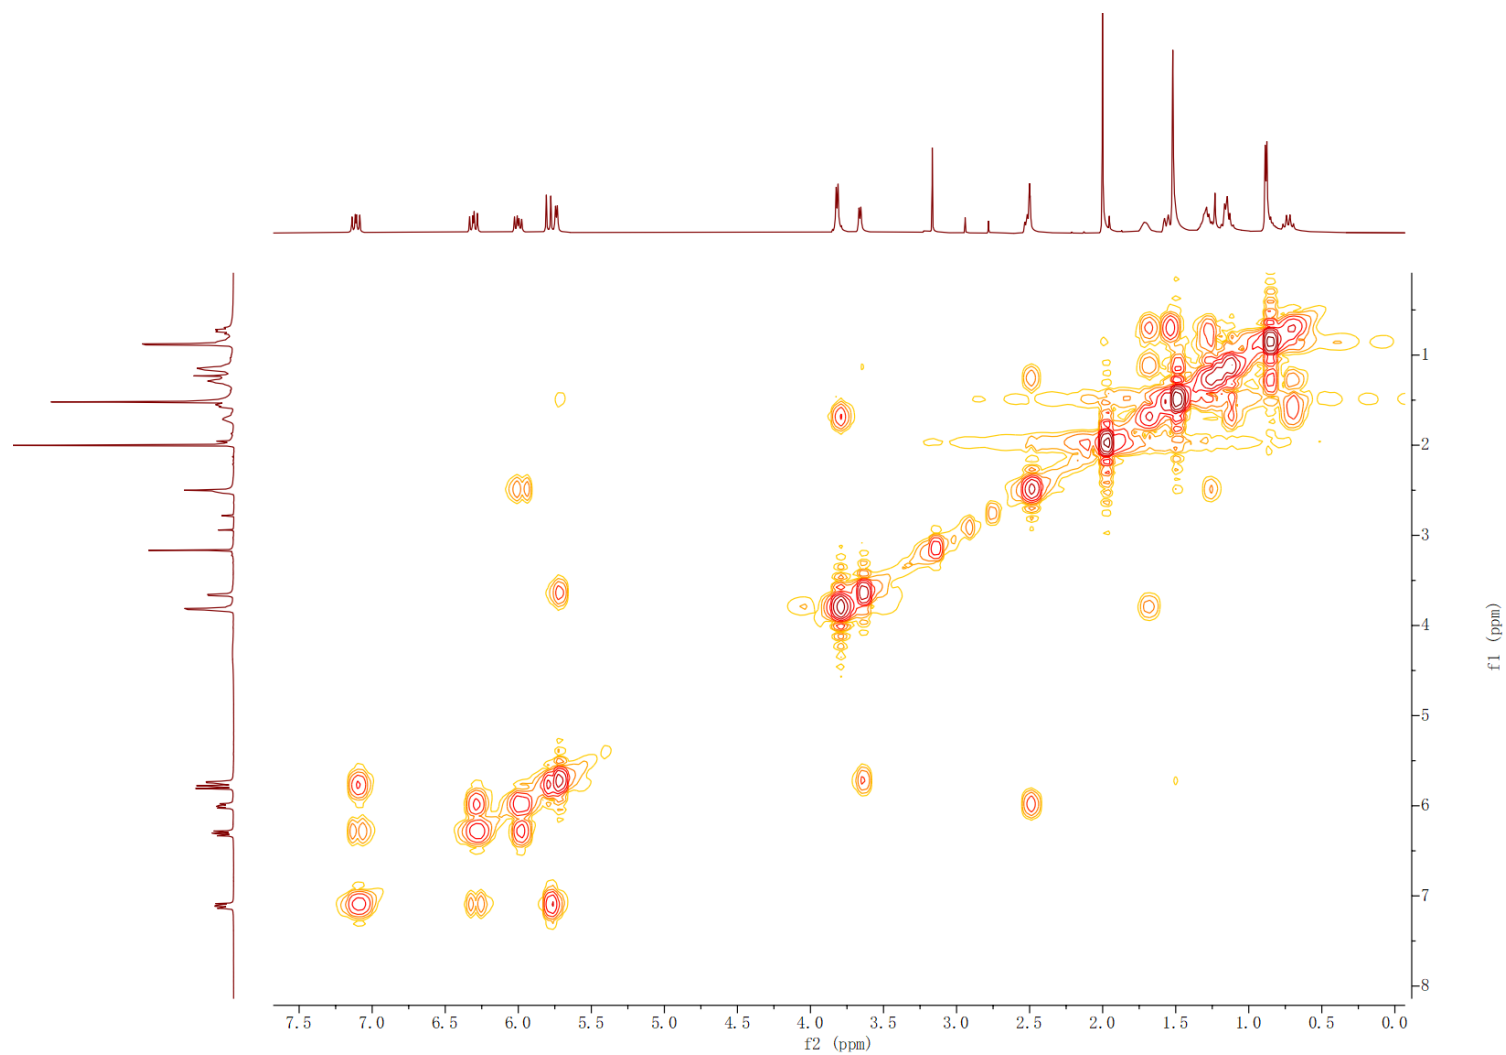

**Figure S40.** HSQC spectrum of compound **6**;

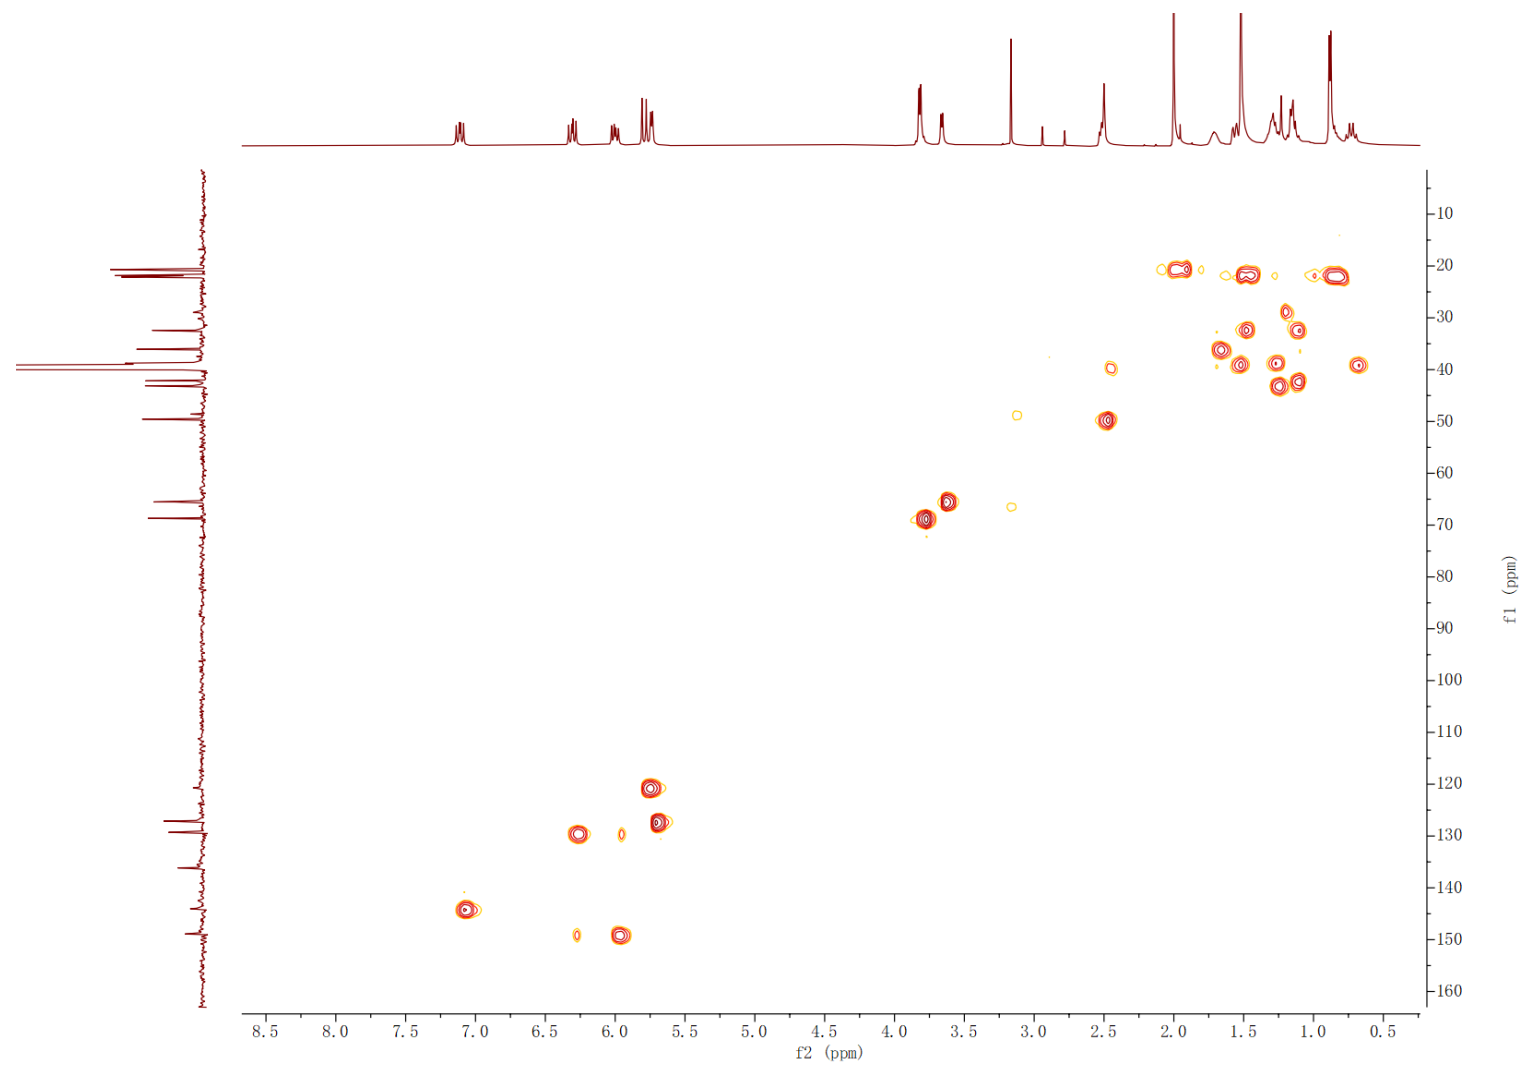

**Figure S41.** HMBC spectrum of compound **6**;

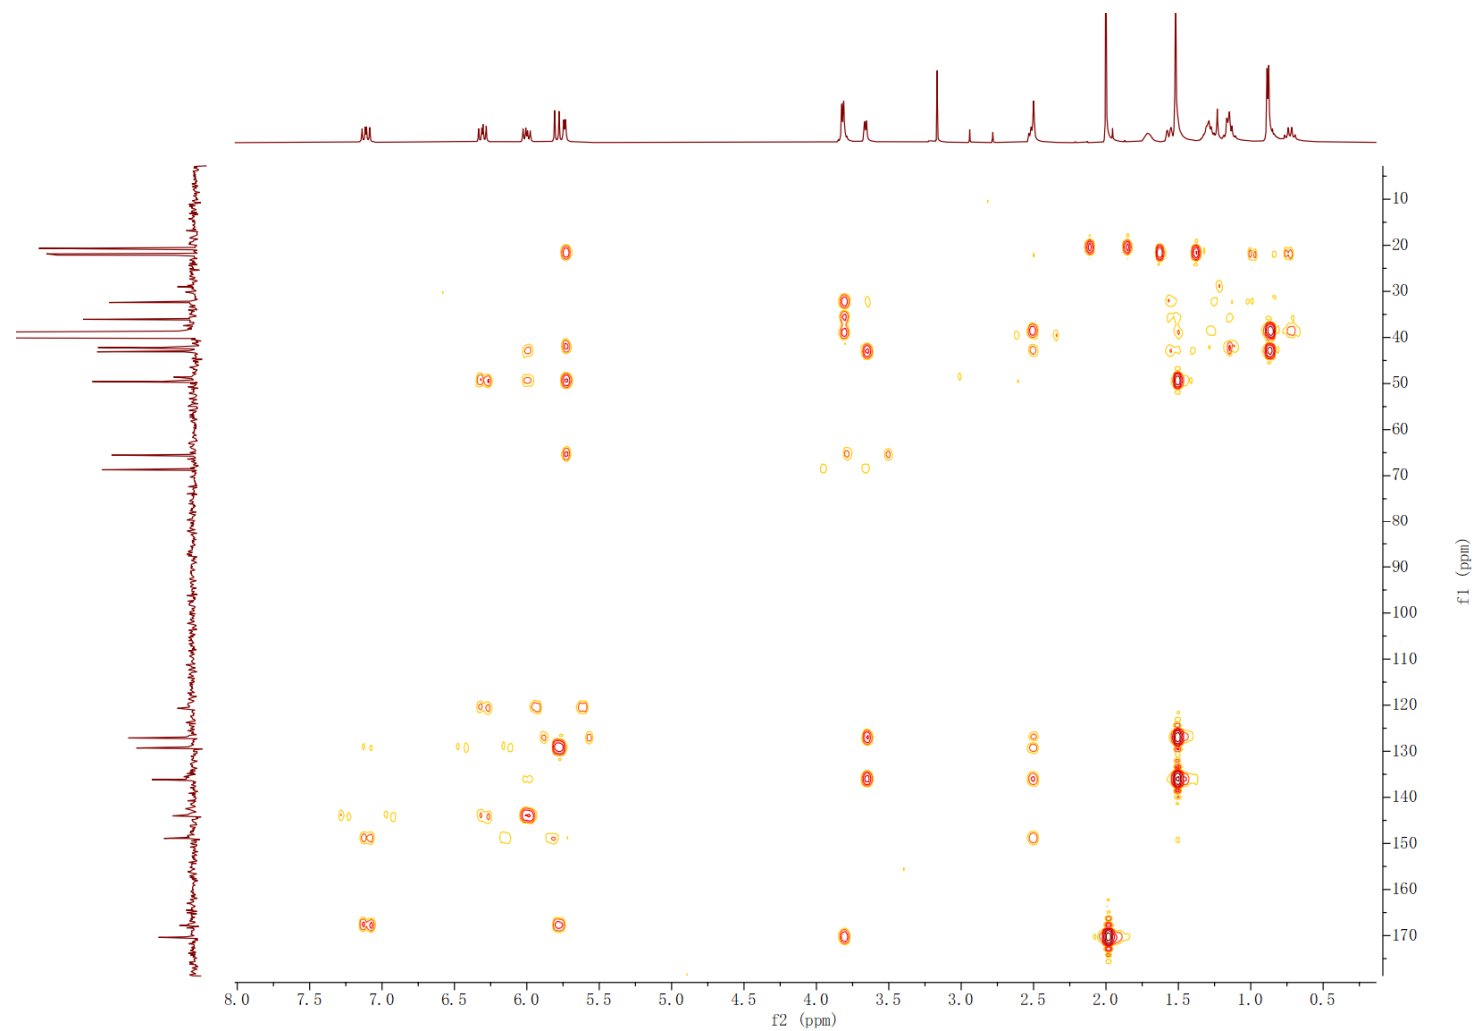

**Figure S42.** NOESY spectrum of compound **6**;

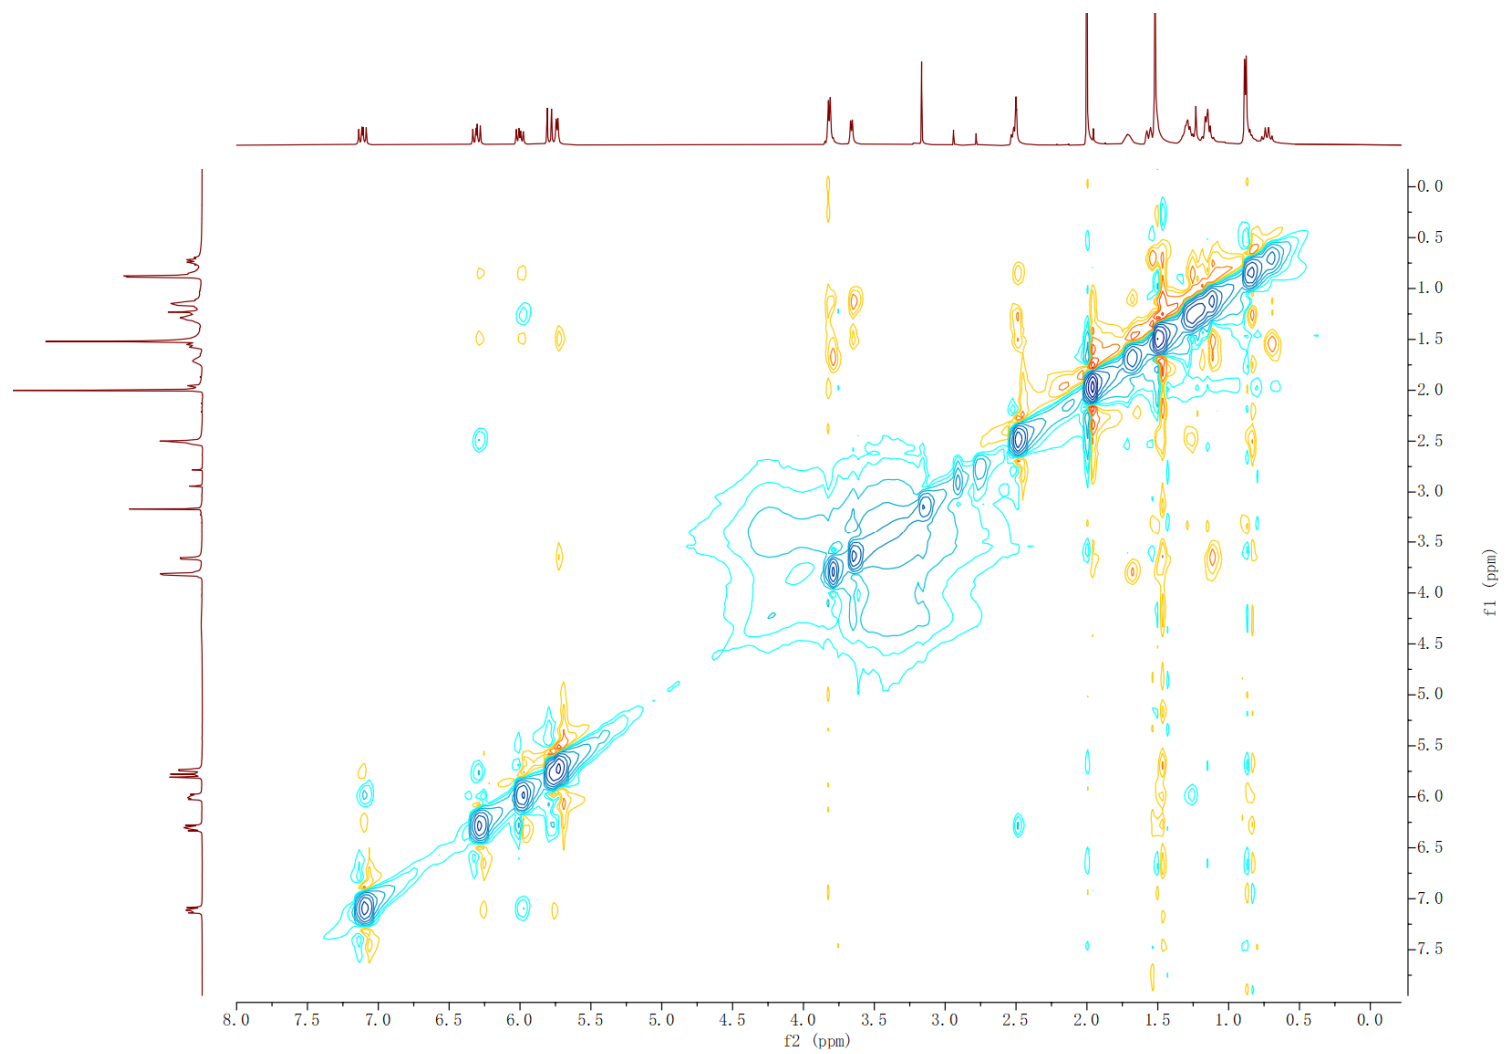

**Figure S43.** HRESI mass spectrum of compound **7**;

20210628-AS324-69\_210625082152 #29 RT: 0.44 AV: 1 NL: 1.25E7  
T: FTMS - c ESI Full ms [150.00-2000.00]

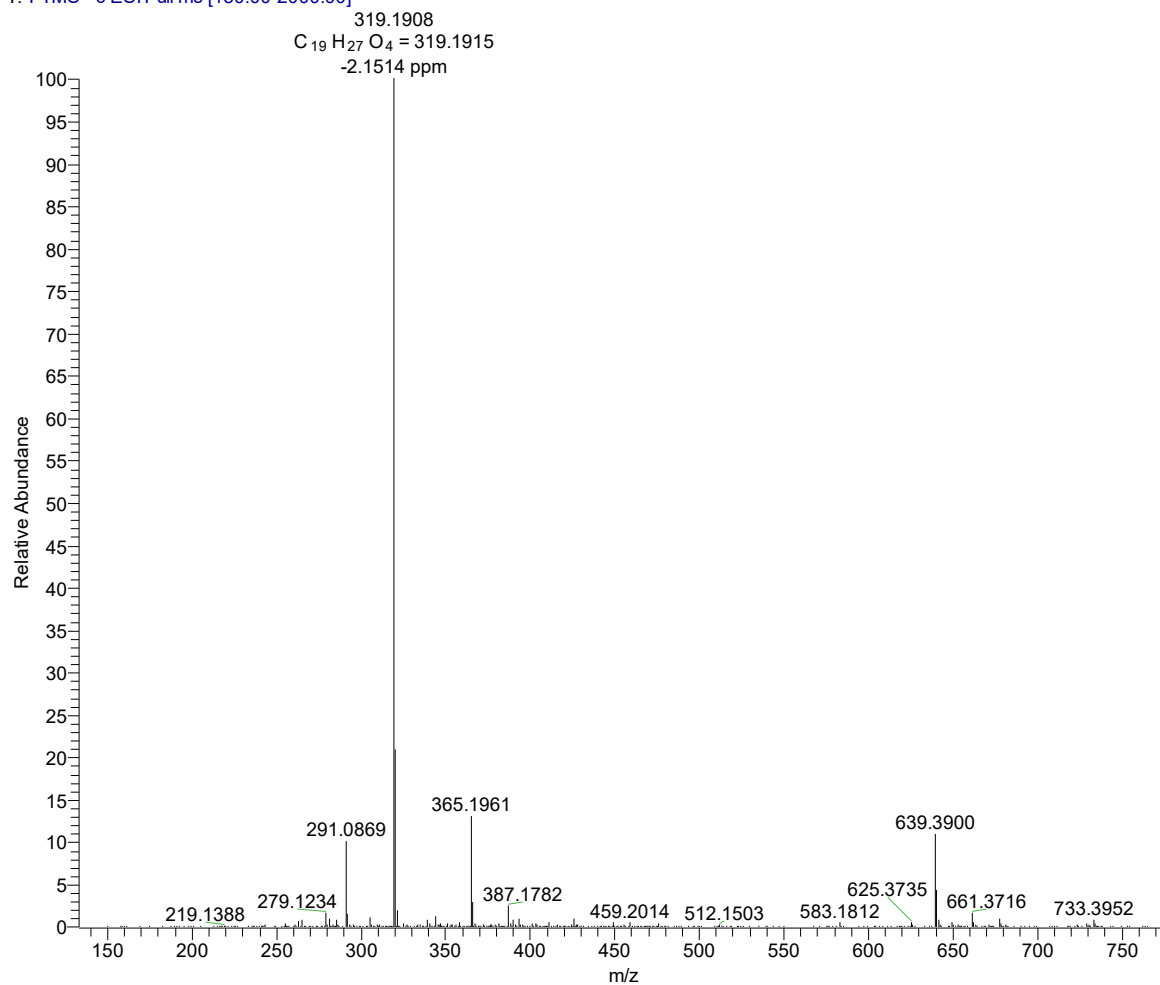

**Figure S44.**  $^1\text{H}$  NMR (500 MHz,  $\text{DMSO}-d_6$ ) spectrum of compound **7**;

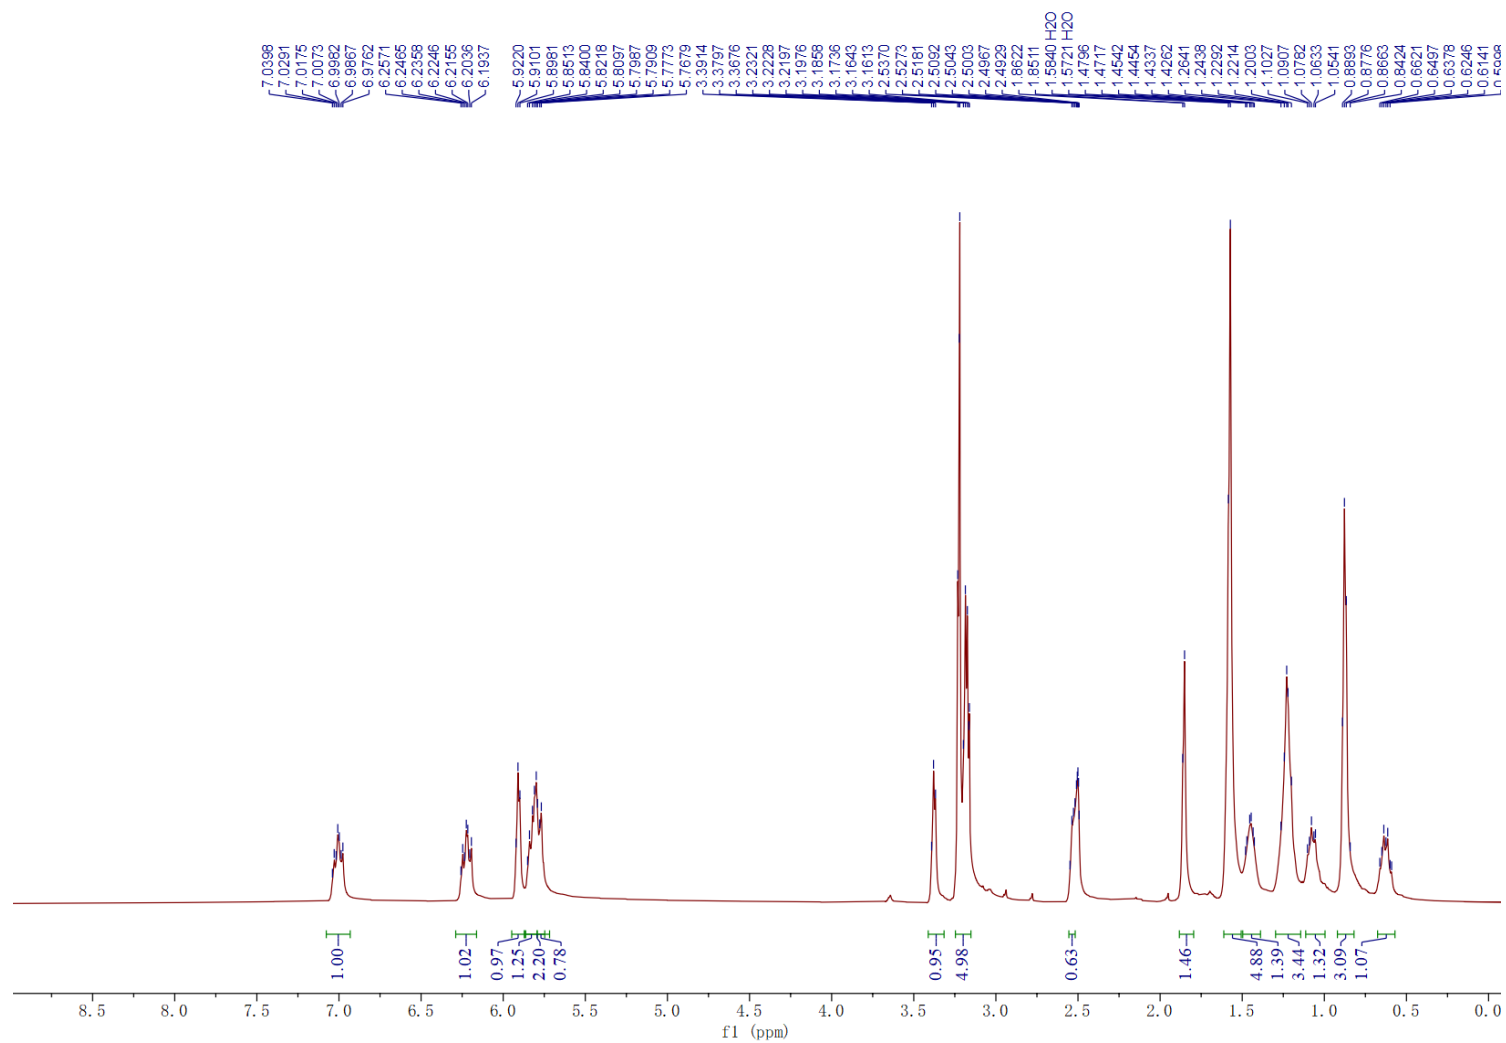



**Figure S45.**  $^{13}\text{C}$  NMR (125 MHz,  $\text{DMSO-}d_6$ ) and DEPT spectra of compound **7**;

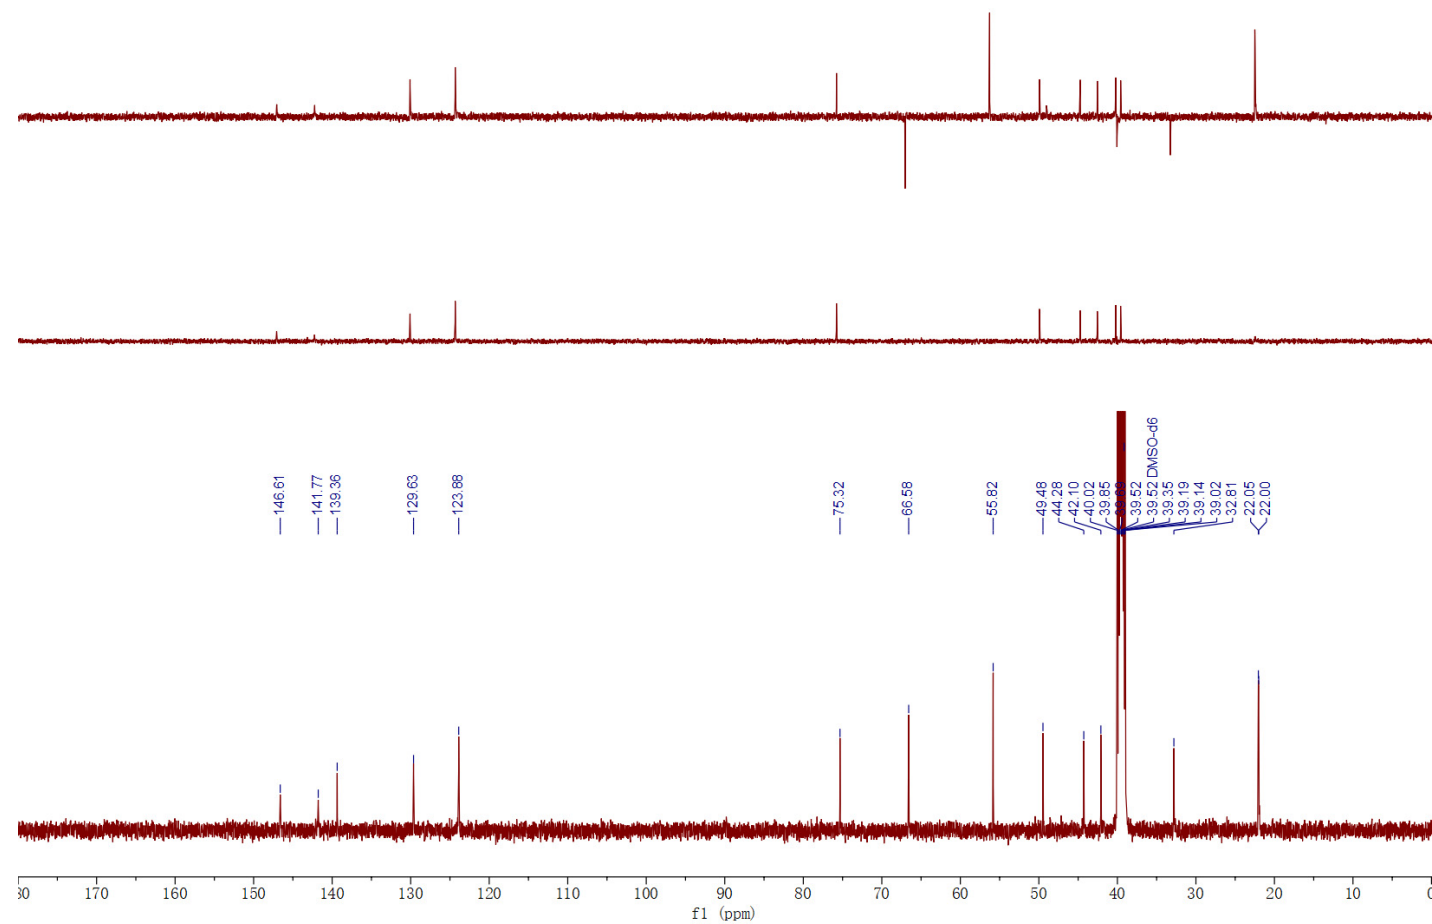

**Figure S46.** COSY spectrum of compound **7**;

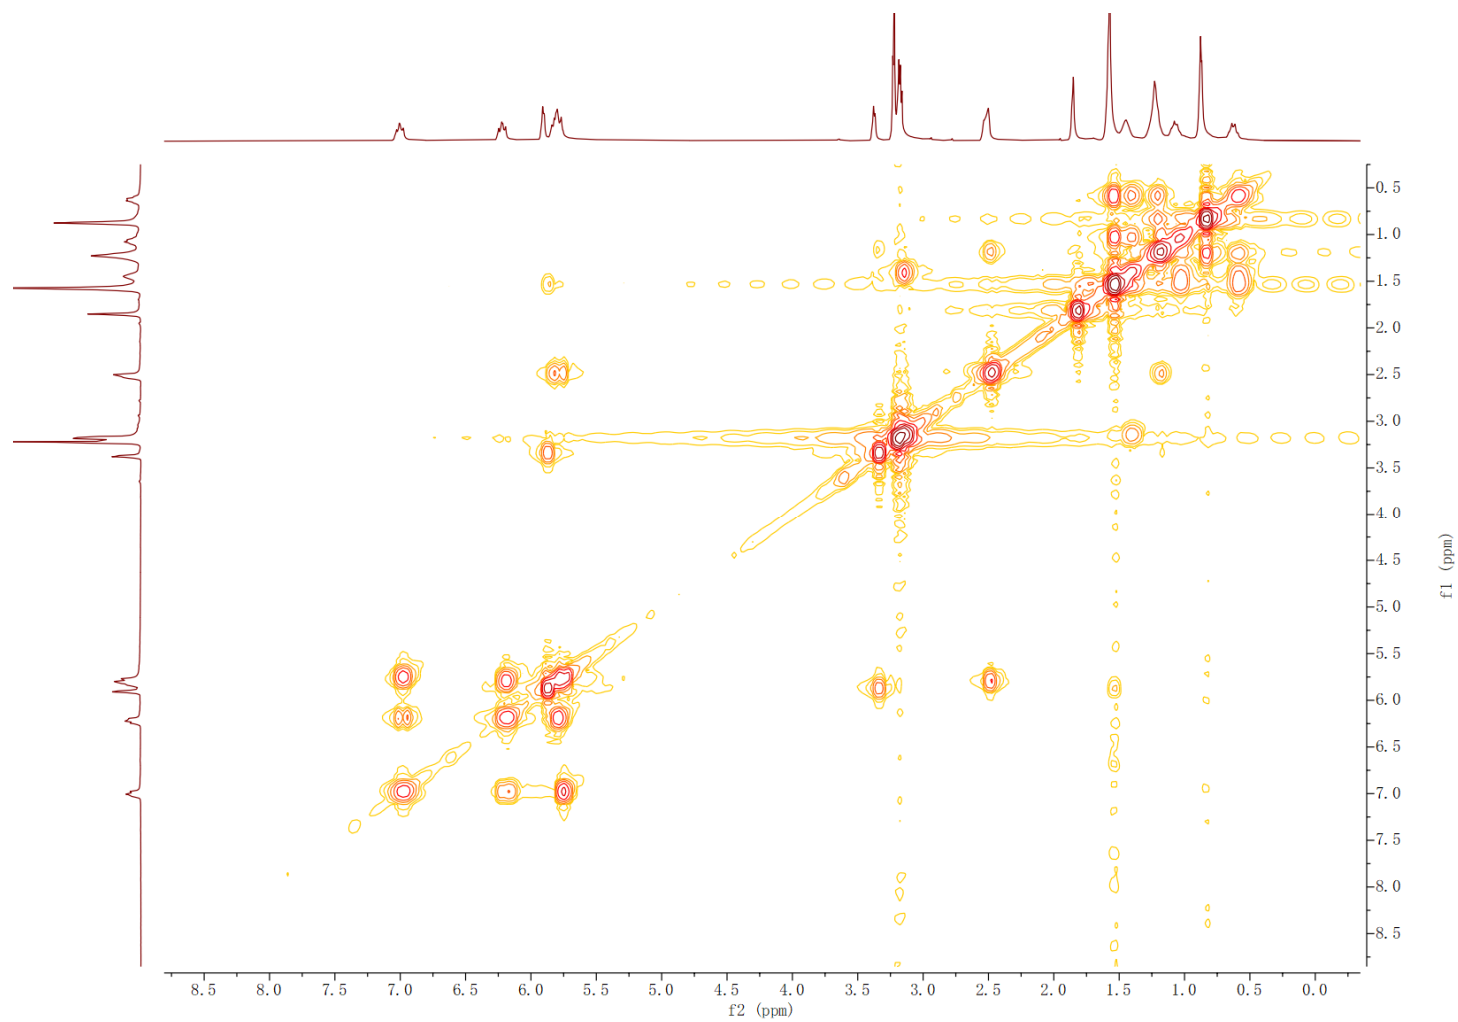

**Figure S47.** HSQC spectrum of compound 7;

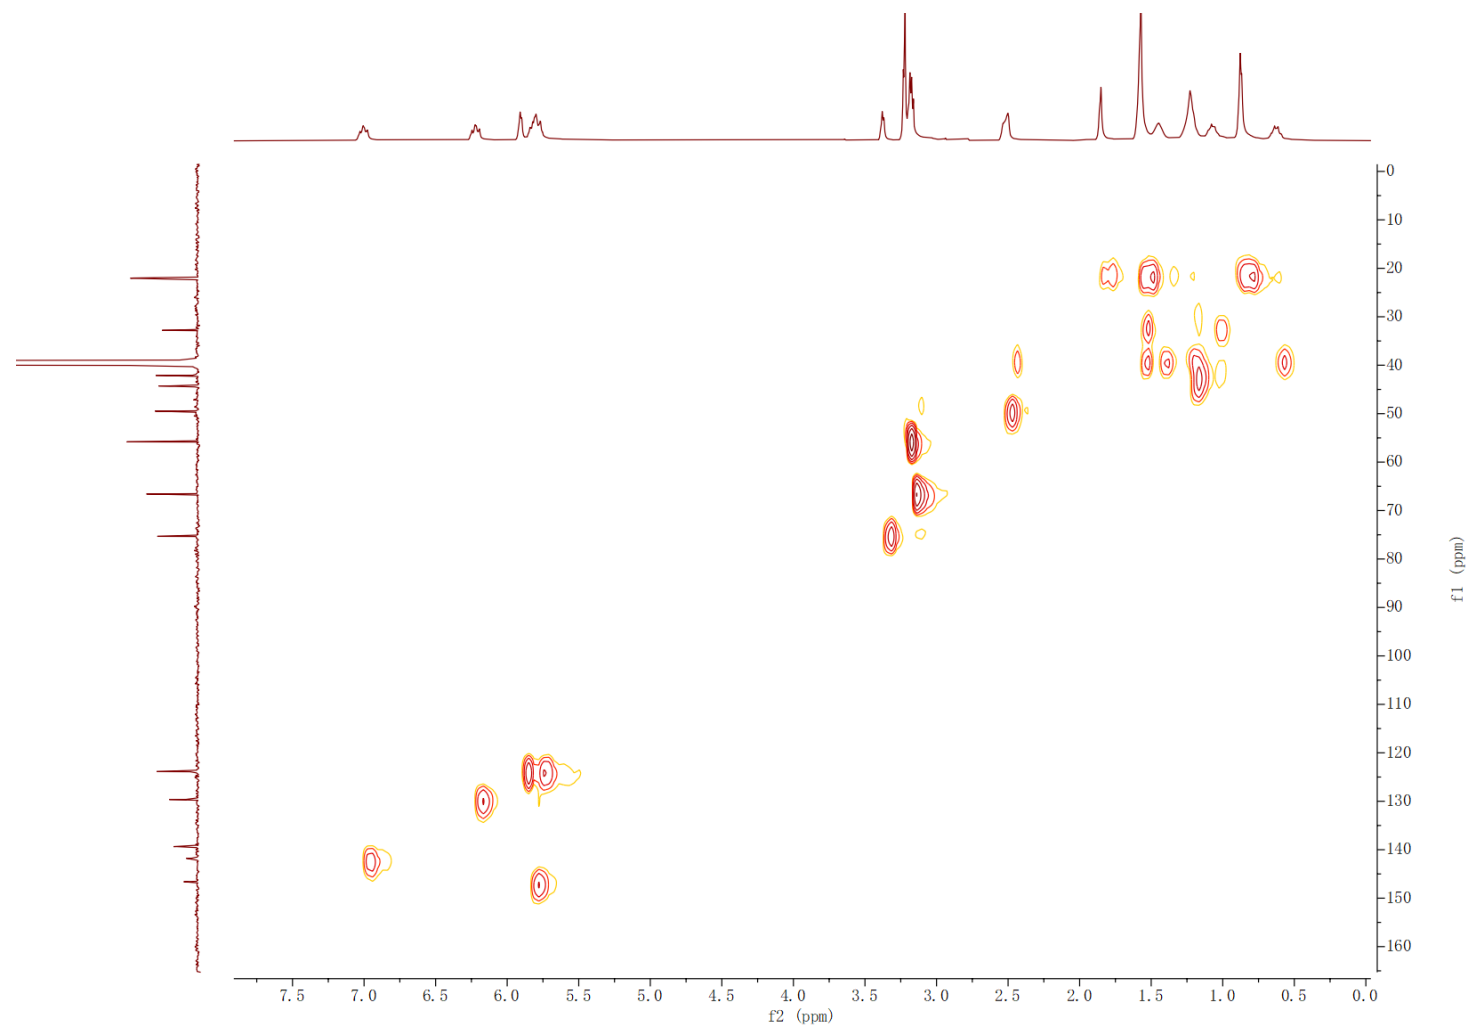

**Figure S48.** HMBC spectrum of compound **7**;

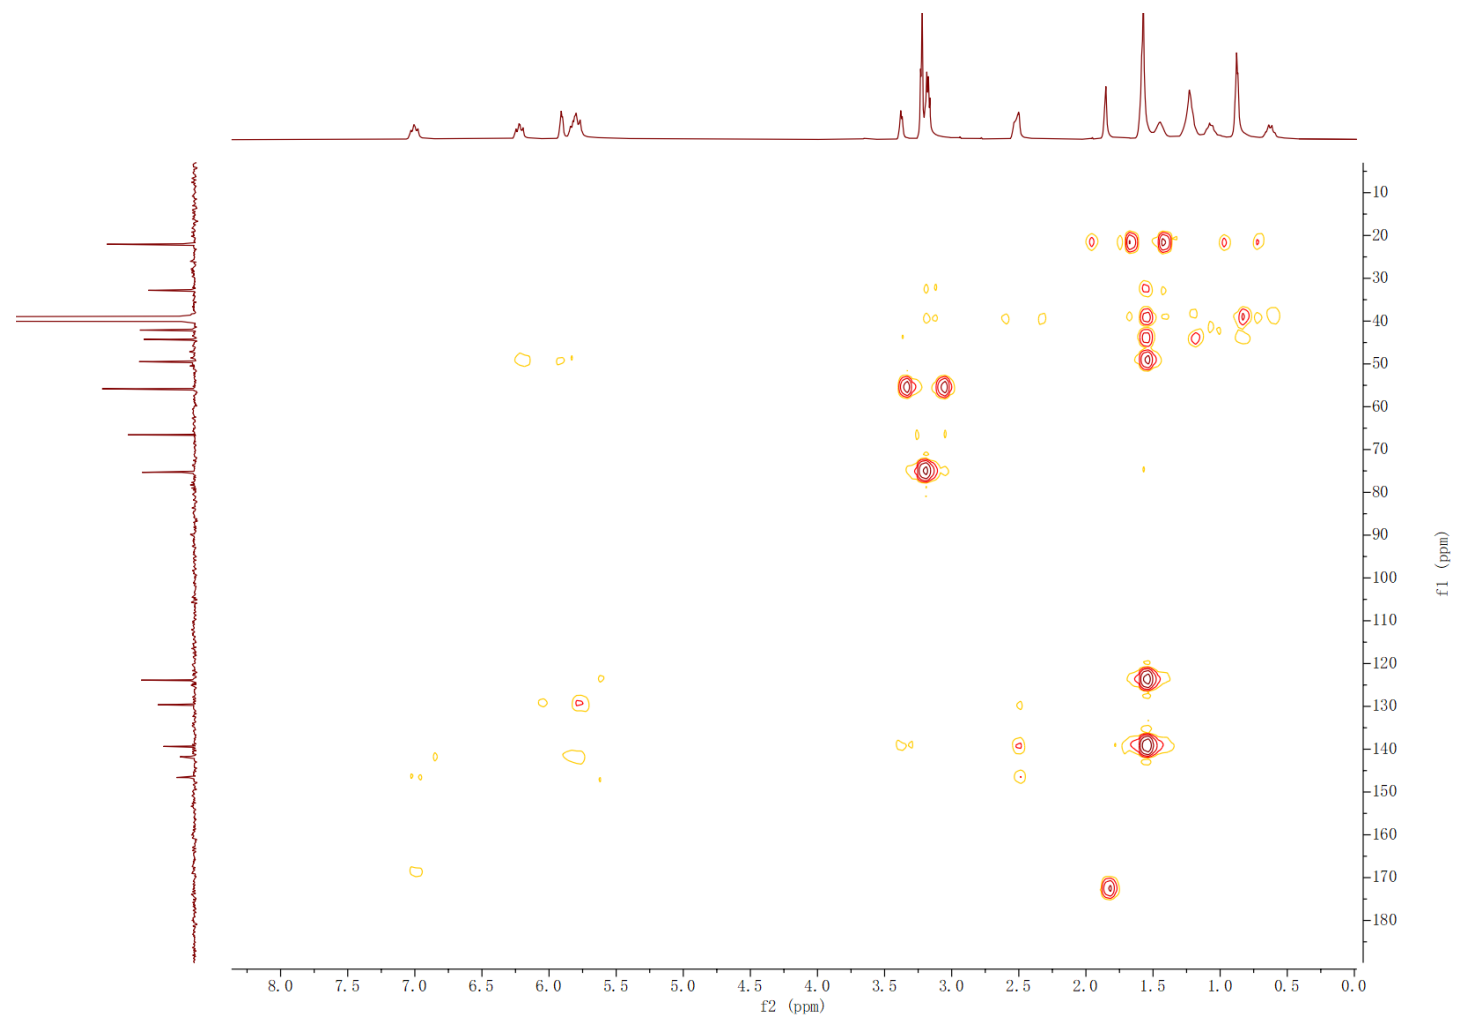

**Figure S49.** NOESY spectrum of compound **7**;

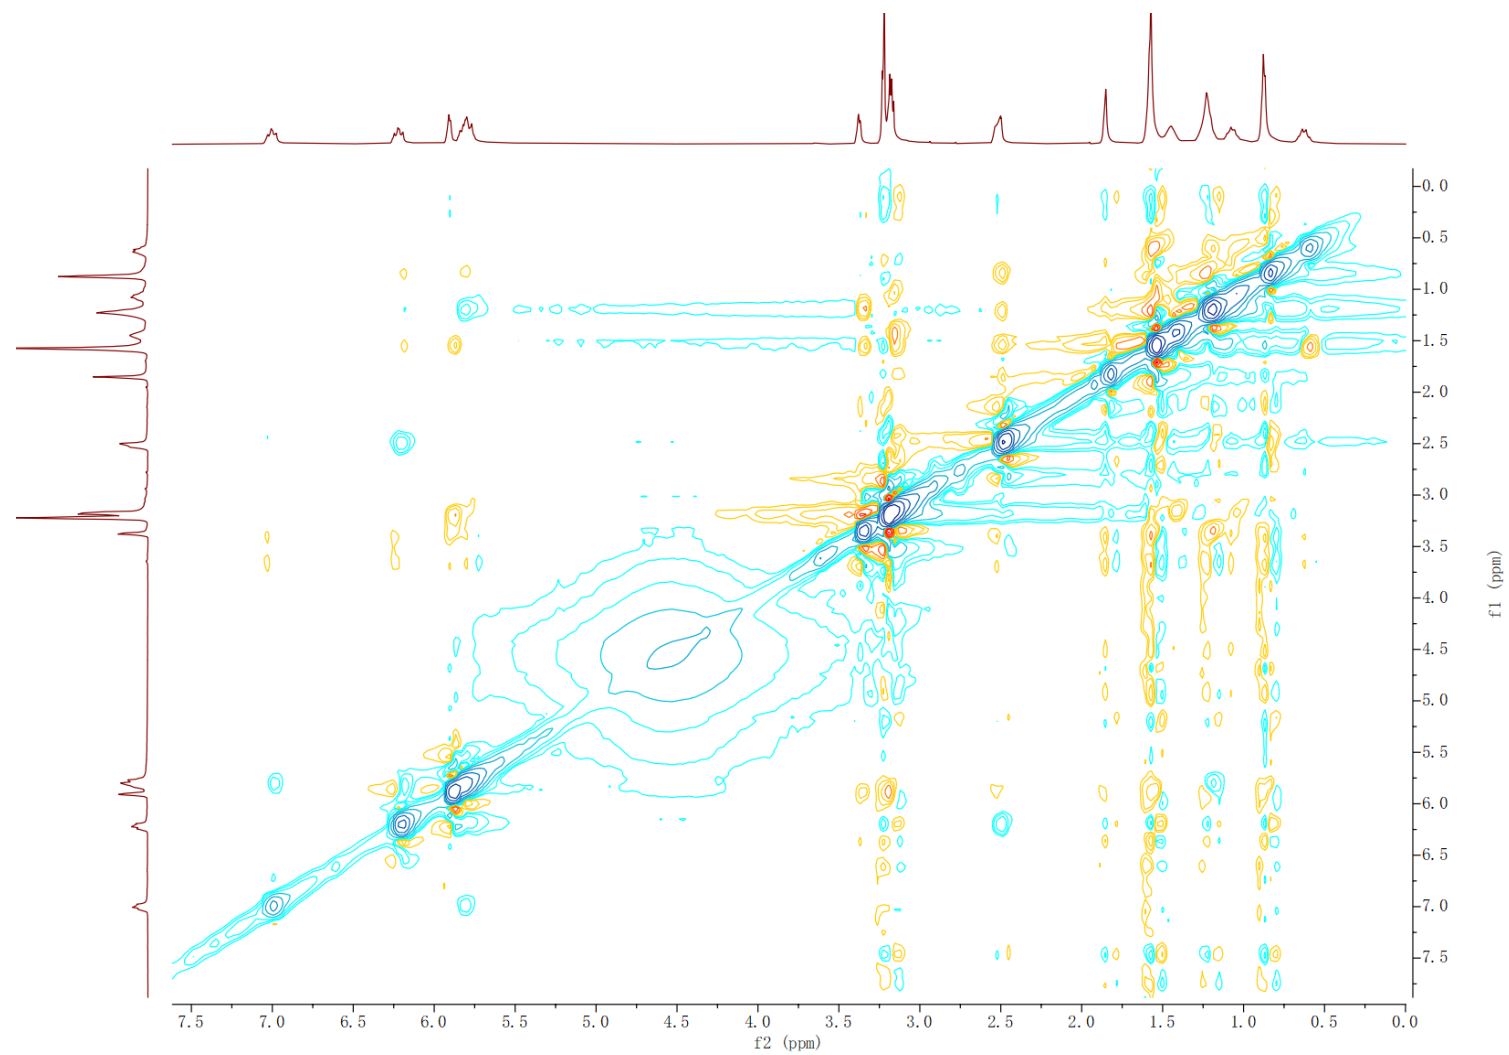

**Figure S50.** HRESI mass spectrum of compound **8**;

20210628-AS324-74\_210625082152 #81-84 RT: 1.05-1.10 AV: 4 NL: 2.89E6  
T: FTMS - c ESI Full ms [150.00-2000.00]

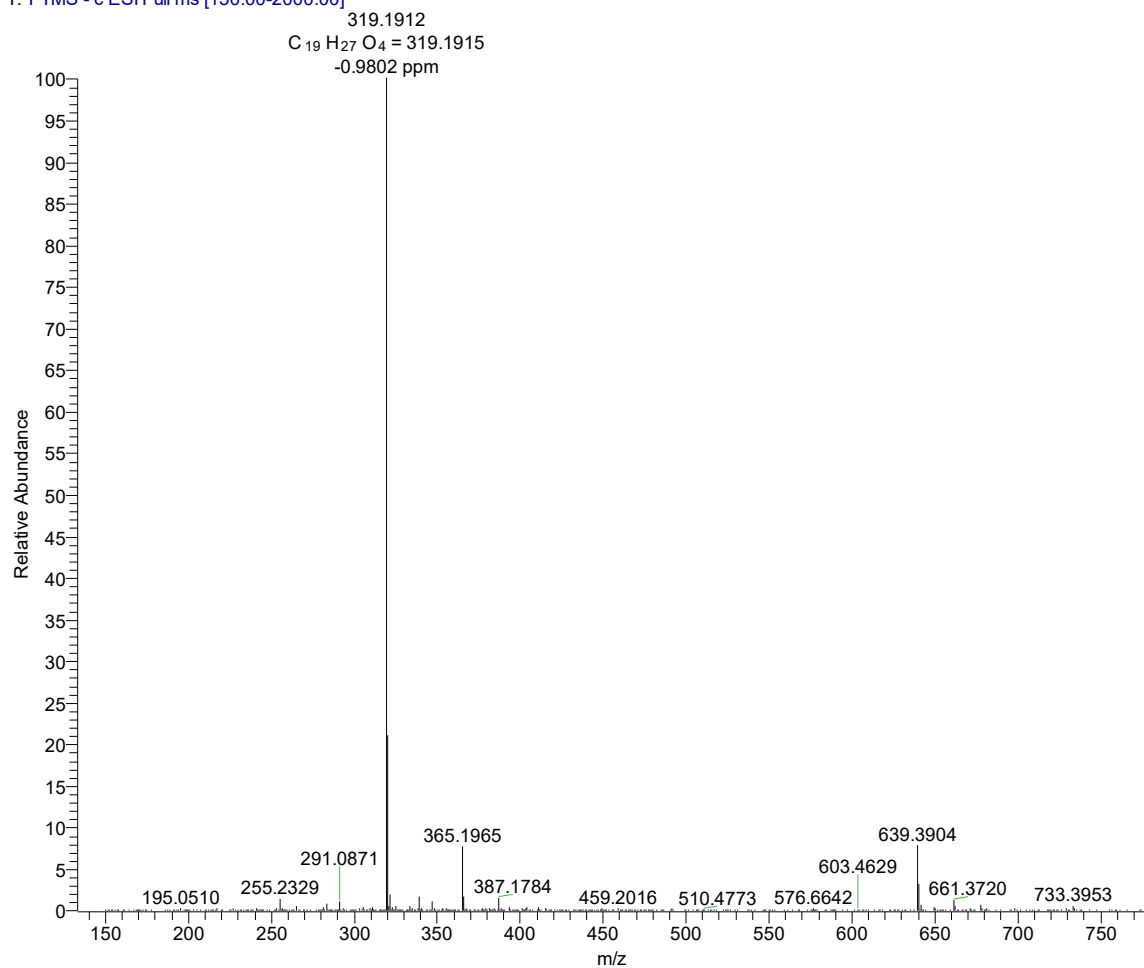

**Figure S51.**  $^1\text{H}$  NMR (500 MHz,  $\text{DMSO}-d_6$ ) spectrum of compound **8**;

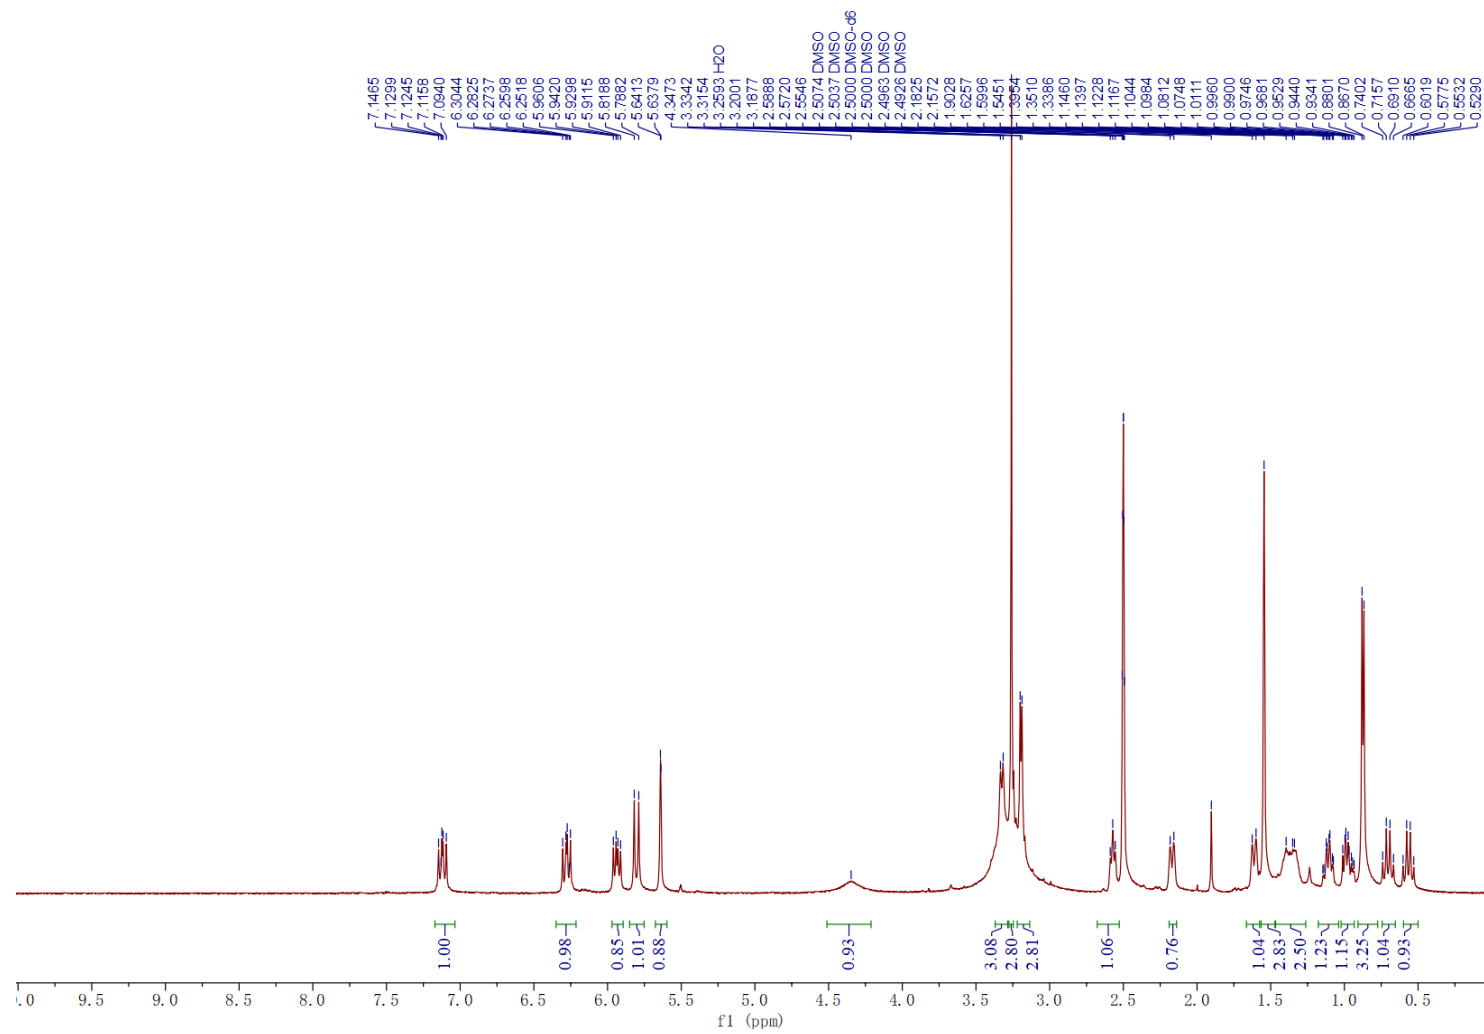

**Figure S52.**  $^{13}\text{C}$  NMR (125 MHz,  $\text{DMSO-}d_6$ ) and DEPT spectra of compound **8**;

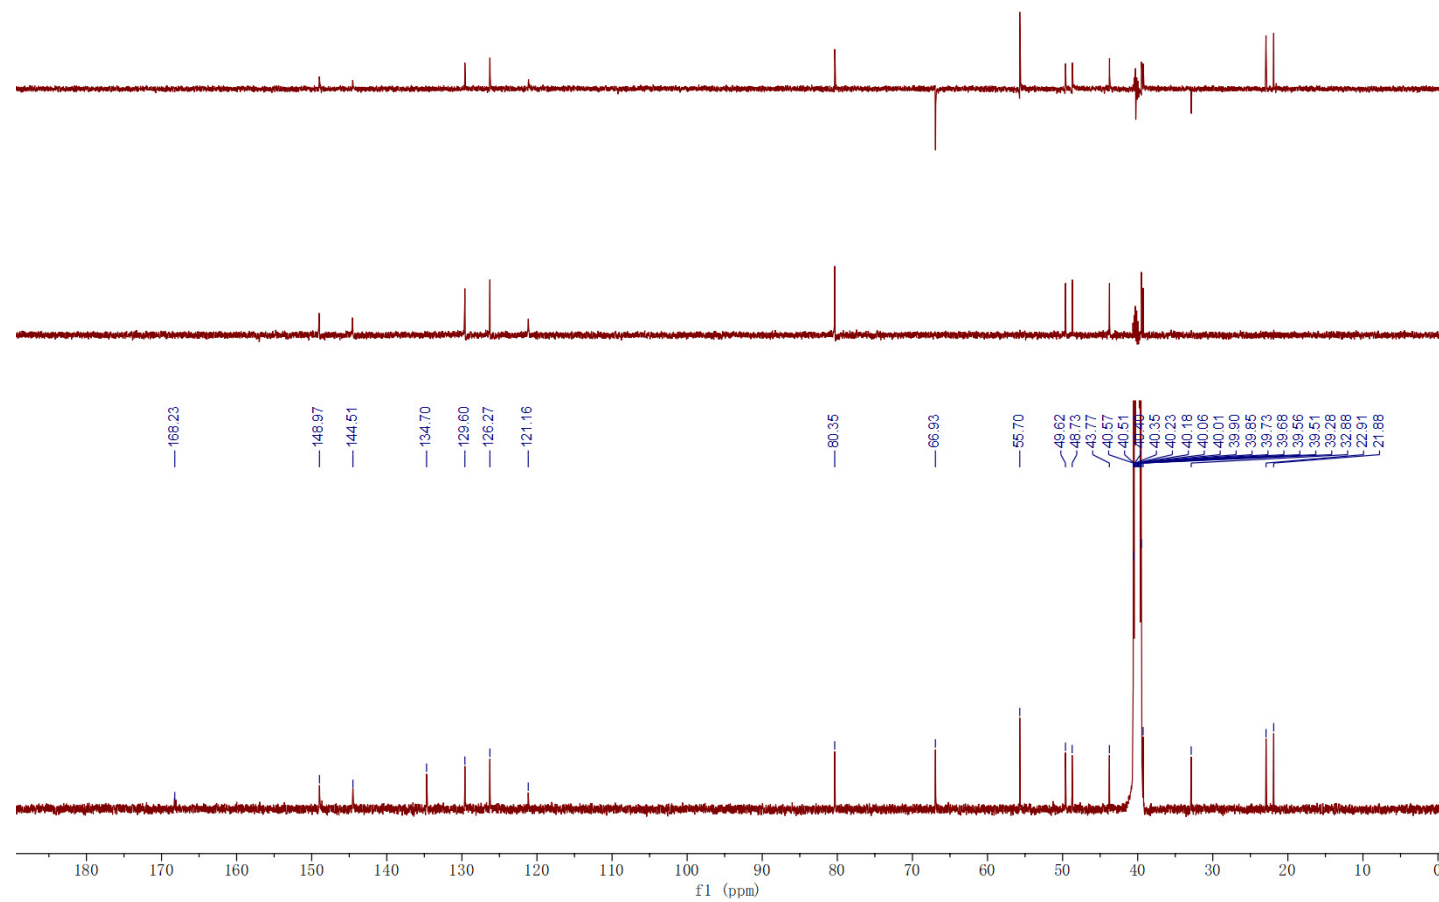



**Figure S53.** COSY spectrum of compound **8**;

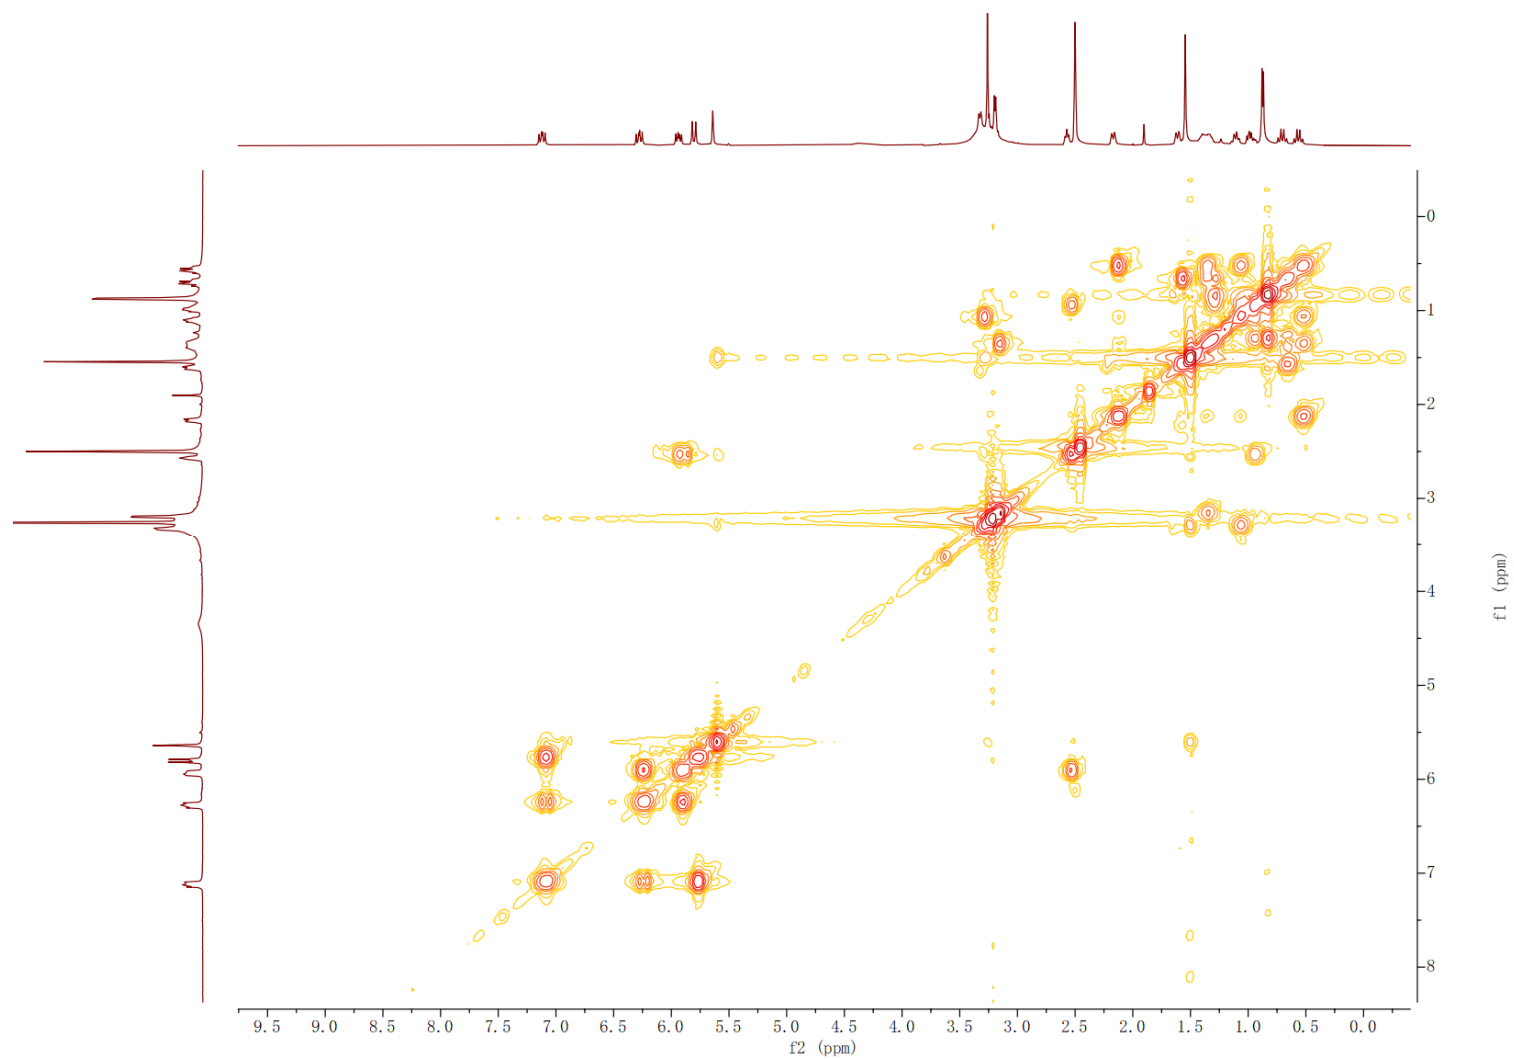

**Figure S54.** HSQC spectrum of compound **8**;

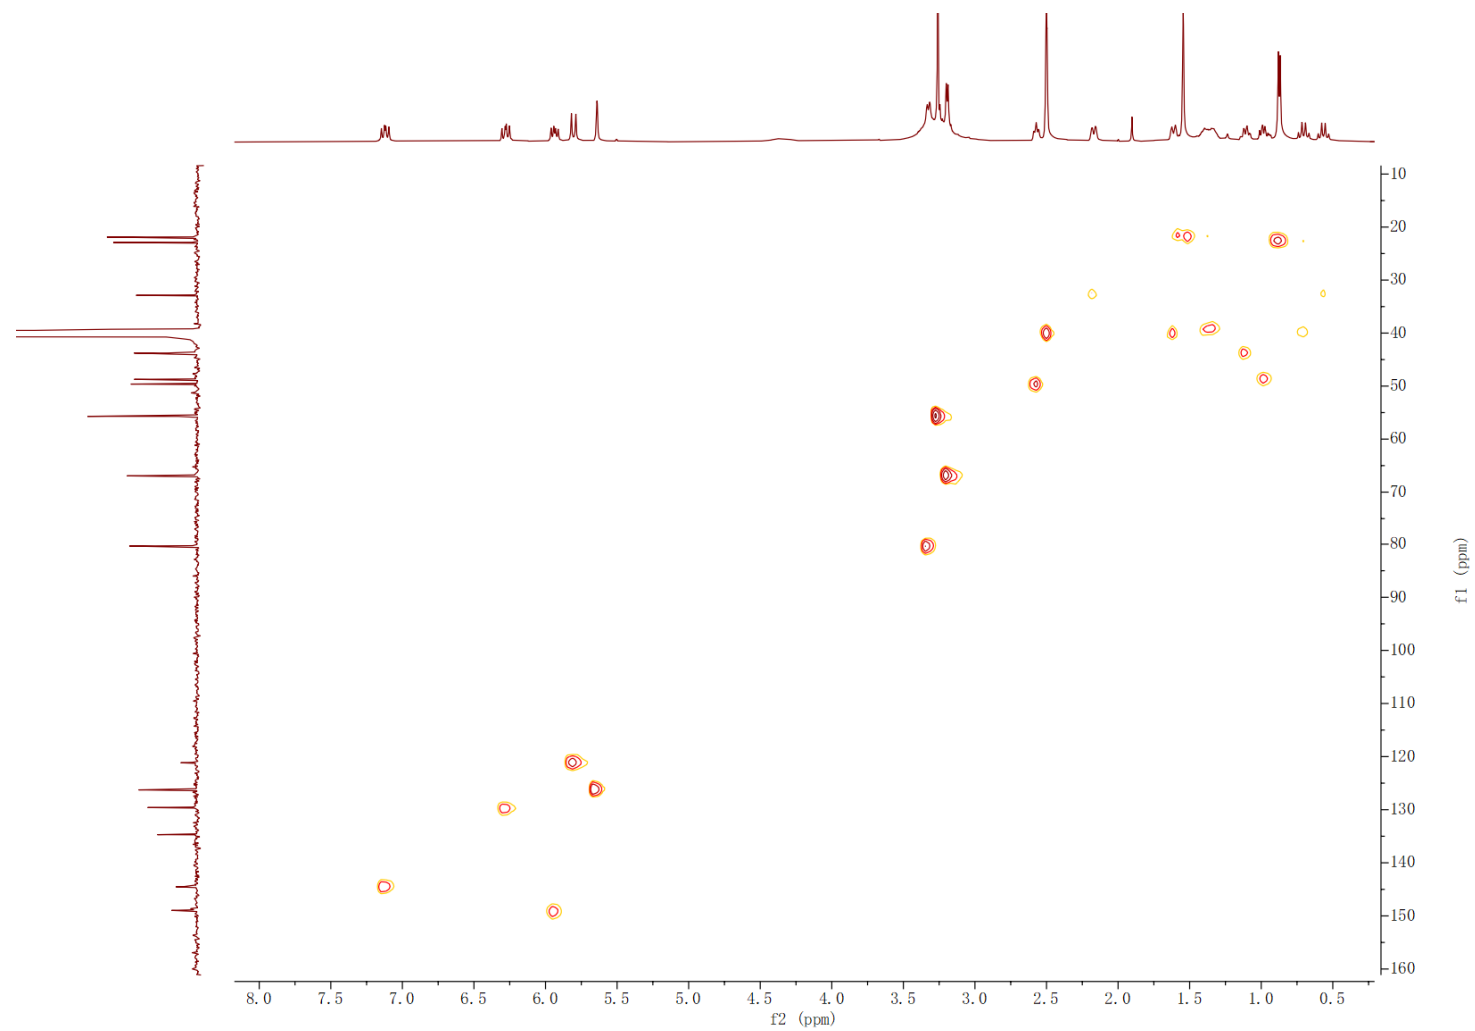

**Figure S55.** HMBC spectrum of compound **8**;

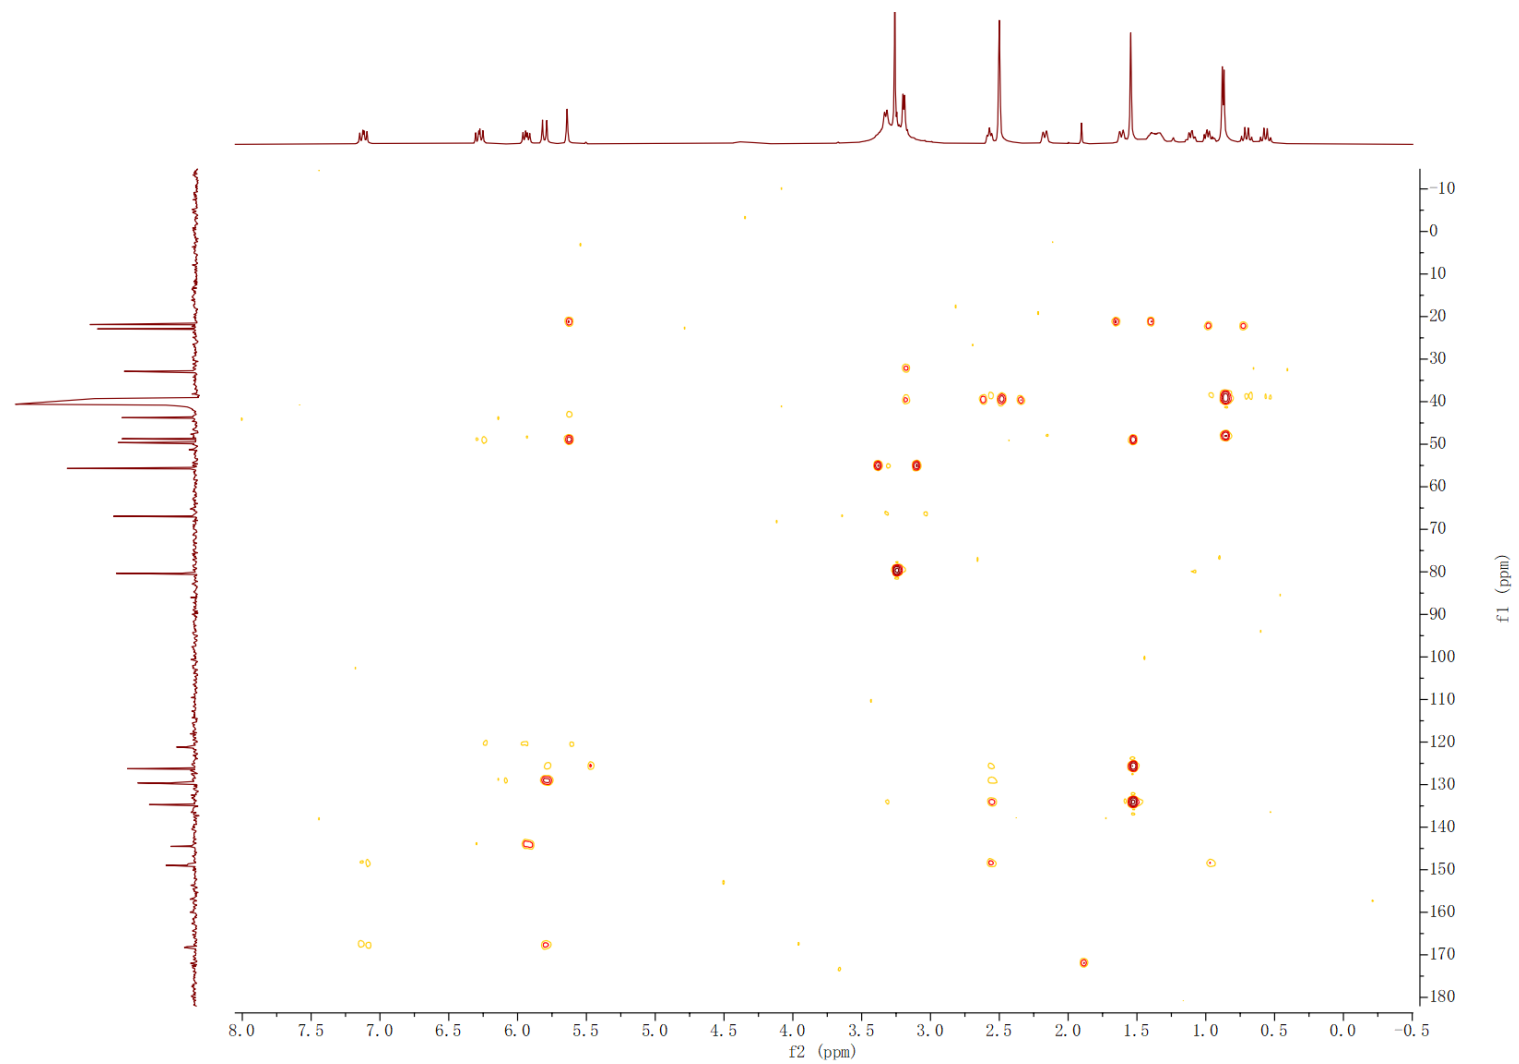

**Figure S56.** NOESY spectrum of compound **8**;

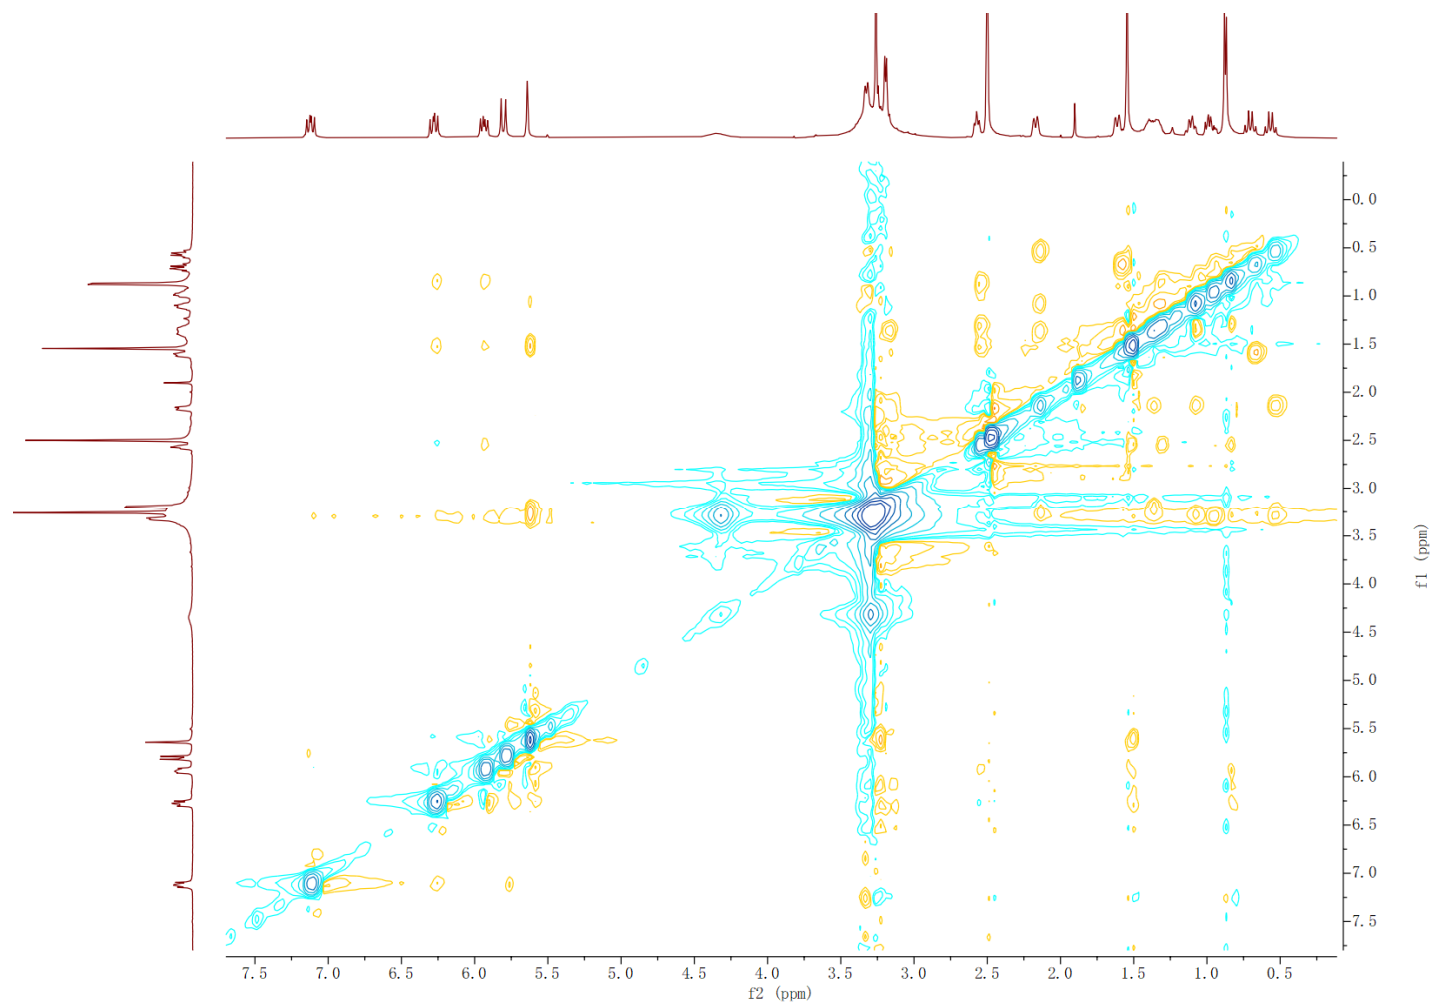

**Figure S57.** Structures and populations of conformers obtained by gas phase B3LYP/6-31G(d) reoptimization of the initial MMFF conformers of (6*R*, 7*R*, 8*R*, 10*S*, 14*S*, and 15*R*)-**4** above 2% population;

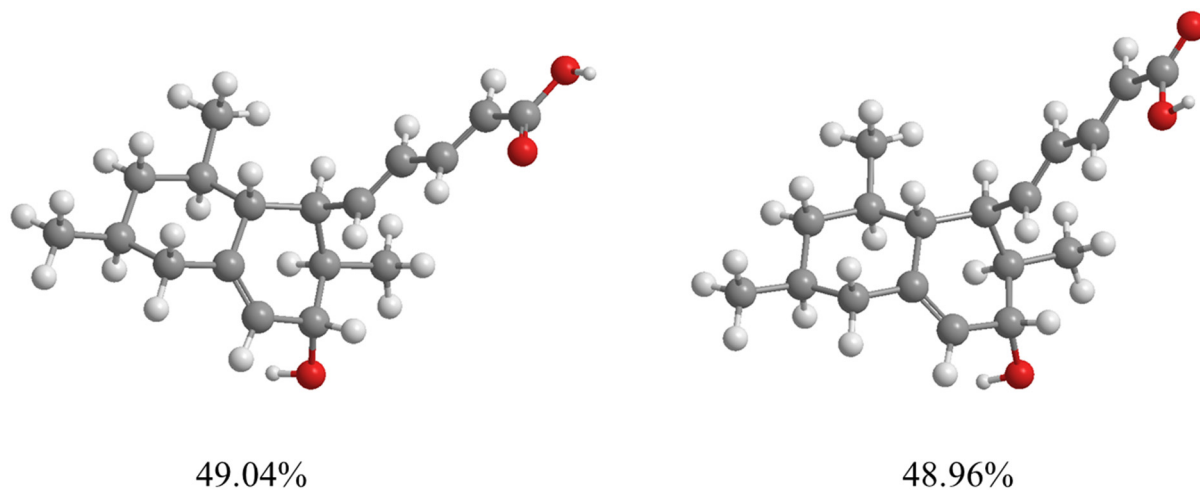

**Figure S58.** Structures and populations of conformers obtained by gas phase B3LYP/6-31G(d) reoptimization of the initial MMFF conformers of (6*R*, 7*R*, 8*R*, 10*R*, 12*S*, and 13*S*)-**5** above 2% population;

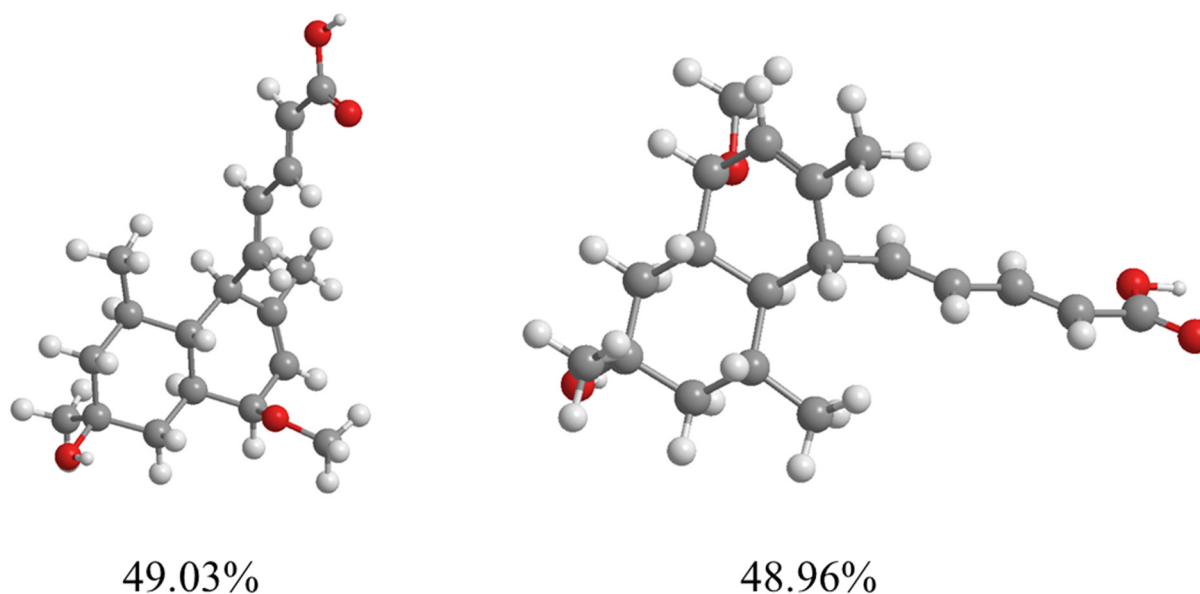

**Figure S59.** Experimental and calculated ECD at different levels of compound **4** and **5**;

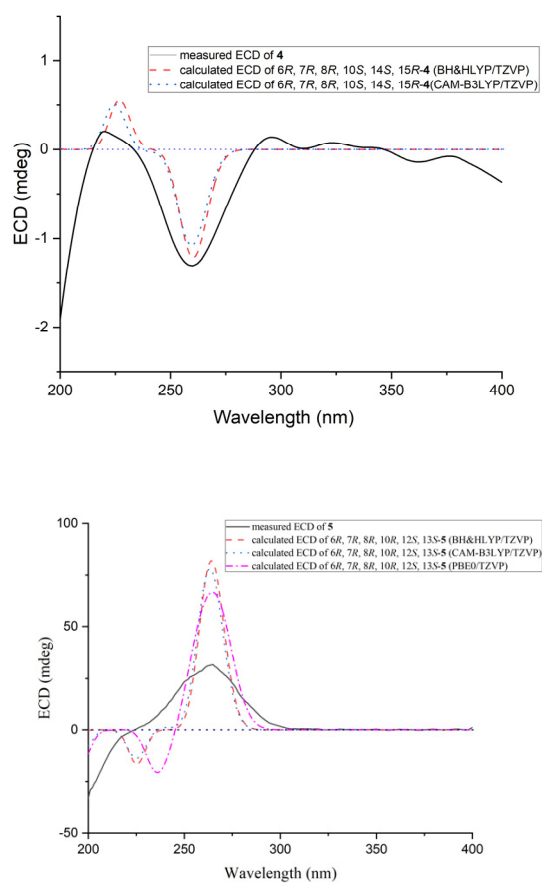

**Table S1.** Cartesian coordinates for the low-energy reoptimized MMFF conformers of **4** calculated at B3LYP/6-31G(d) level of theory in vacuo;

| Compound <b>4</b> Conformer A |      | Standard Orientation (Ångstroms) |           |           |
|-------------------------------|------|----------------------------------|-----------|-----------|
|                               | Type | X                                | Y         | Z         |
| 1                             | C    | -3.430922                        | -1.837529 | 0.712851  |
| 2                             | C    | -4.059837                        | -1.357744 | -0.606239 |
| 3                             | C    | -2.952493                        | -0.941961 | -1.601788 |
| 4                             | C    | -2.020619                        | 0.05162   | -0.955533 |
| 5                             | C    | -1.347473                        | -0.451088 | 0.311031  |
| 6                             | C    | -2.439744                        | -0.842037 | 1.356015  |
| 7                             | C    | -1.866771                        | 1.303371  | -1.416432 |
| 8                             | C    | -1.069721                        | 2.383223  | -0.73     |
| 9                             | C    | -0.739164                        | 2.007703  | 0.725231  |
| 10                            | C    | -0.248961                        | 0.533243  | 0.814727  |
| 11                            | C    | 1.029539                         | 0.293616  | 0.053187  |
| 12                            | C    | 2.213847                         | -0.033953 | 0.60963   |
| 13                            | C    | 3.410356                         | -0.289913 | -0.165473 |
| 14                            | C    | 4.610791                         | -0.617972 | 0.360385  |
| 15                            | C    | 5.773553                         | -0.863044 | -0.505587 |
| 16                            | O    | 6.883488                         | -1.176705 | 0.223041  |
| 17                            | O    | 5.799353                         | -0.807608 | -1.723458 |
| 18                            | C    | -1.860688                        | -1.45082  | 2.643084  |
| 19                            | C    | -4.993126                        | -2.415714 | -1.207568 |
| 20                            | C    | 0.229723                         | 3.001208  | 1.37557   |
| 21                            | O    | -1.764761                        | 3.641097  | -0.805019 |
| 22                            | H    | -0.841116                        | -1.397317 | 0.055109  |
| 23                            | H    | -0.040815                        | 0.325403  | 1.870414  |
| 24                            | H    | -4.227312                        | -2.066325 | 1.434845  |
| 25                            | H    | -2.90193                         | -2.787401 | 0.529343  |
| 26                            | H    | -4.656574                        | -0.457787 | -0.389301 |
| 27                            | H    | -2.393826                        | -1.843969 | -1.900694 |
| 28                            | H    | -3.397438                        | -0.521658 | -2.512304 |
| 29                            | H    | -2.997709                        | 0.068116  | 1.624841  |
| 30                            | H    | -2.364009                        | 1.608164  | -2.338174 |
| 31                            | H    | -0.139485                        | 2.583923  | -1.279196 |
| 32                            | H    | -1.690382                        | 2.049466  | 1.27908   |
| 33                            | H    | 0.97333                          | 0.363427  | -1.034784 |
| 34                            | H    | 2.294515                         | -0.11753  | 1.694588  |
| 35                            | H    | 3.334591                         | -0.212912 | -1.250102 |
| 36                            | H    | 4.761884                         | -0.712071 | 1.432308  |
| 37                            | H    | 7.605445                         | -1.322876 | -0.416178 |
| 38                            | H    | -1.220087                        | -2.313845 | 2.417072  |
| 39                            | H    | -1.267493                        | -0.734501 | 3.221202  |
| 40                            | H    | -2.669538                        | -1.801253 | 3.295946  |
| 41                            | H    | -4.442906                        | -3.335115 | -1.448514 |
| 42                            | H    | -5.460199                        | -2.054297 | -2.132199 |
| 43                            | H    | -5.796208                        | -2.68065  | -0.508534 |

|    |   |           |          |           |
|----|---|-----------|----------|-----------|
| 44 | H | -0.165301 | 4.019704 | 1.30783   |
| 45 | H | 1.209711  | 2.984947 | 0.884052  |
| 46 | H | 0.38448   | 2.762651 | 2.43551   |
| 47 | H | -2.666003 | 3.50618  | -0.467216 |

B3LYP Energy = -926.904287.

| Compound 4 Conformer B |      | Standard Orientation (Ångstroms) |           |           |
|------------------------|------|----------------------------------|-----------|-----------|
|                        | Type | X                                | Y         | Z         |
| 1                      | C    | -3.438337                        | -1.817075 | 0.713268  |
| 2                      | C    | -4.049904                        | -1.347314 | -0.617575 |
| 3                      | C    | -2.929109                        | -0.948922 | -1.605235 |
| 4                      | C    | -1.99836                         | 0.045779  | -0.959102 |
| 5                      | C    | -1.342052                        | -0.447745 | 0.319849  |
| 6                      | C    | -2.448254                        | -0.820701 | 1.356758  |
| 7                      | C    | -1.832898                        | 1.29224   | -1.430364 |
| 8                      | C    | -1.037528                        | 2.374594  | -0.745623 |
| 9                      | C    | -0.725583                        | 2.011468  | 0.71691   |
| 10                     | C    | -0.243269                        | 0.535565  | 0.824689  |
| 11                     | C    | 1.041059                         | 0.284169  | 0.076582  |
| 12                     | C    | 2.218638                         | -0.045285 | 0.645434  |
| 13                     | C    | 3.42329                          | -0.310101 | -0.116254 |
| 14                     | C    | 4.612486                         | -0.640691 | 0.435162  |
| 15                     | C    | 5.836165                         | -0.91104  | -0.32913  |
| 16                     | O    | 5.685405                         | -0.799254 | -1.681453 |
| 17                     | O    | 6.907297                         | -1.211453 | 0.170876  |
| 18                     | C    | -1.887311                        | -1.418779 | 2.65675   |
| 19                     | C    | -4.983199                        | -2.405852 | -1.217891 |
| 20                     | C    | 0.240475                         | 3.006348  | 1.36932   |
| 21                     | O    | -1.723902                        | 3.635625  | -0.841732 |
| 22                     | H    | -0.838781                        | -1.399761 | 0.079871  |
| 23                     | H    | -0.045418                        | 0.336155  | 1.883958  |
| 24                     | H    | -4.24382                         | -2.033645 | 1.428869  |
| 25                     | H    | -2.913118                        | -2.771895 | 0.545272  |
| 26                     | H    | -4.643285                        | -0.44146  | -0.416691 |
| 27                     | H    | -2.372822                        | -1.857565 | -1.888117 |
| 28                     | H    | -3.36141                         | -0.535695 | -2.52506  |
| 29                     | H    | -3.003598                        | 0.095665  | 1.609229  |
| 30                     | H    | -2.319137                        | 1.590898  | -2.359972 |
| 31                     | H    | -0.099705                        | 2.564221  | -1.285888 |
| 32                     | H    | -1.682865                        | 2.062812  | 1.259375  |
| 33                     | H    | 0.994664                         | 0.347667  | -1.012302 |
| 34                     | H    | 2.289702                         | -0.123274 | 1.731433  |
| 35                     | H    | 3.3511                           | -0.234671 | -1.200145 |
| 36                     | H    | 4.734617                         | -0.728053 | 1.511276  |
| 37                     | H    | 6.55594                          | -0.999105 | -2.07135  |
| 38                     | H    | -2.705457                        | -1.756577 | 3.304652  |
| 39                     | H    | -1.250126                        | -2.288542 | 2.447479  |
| 40                     | H    | -1.29565                         | -0.699975 | 3.233329  |



|    |   |           |           |           |
|----|---|-----------|-----------|-----------|
| 41 | H | -5.438671 | -2.051215 | -2.150903 |
| 42 | H | -5.794929 | -2.658962 | -0.524516 |
| 43 | H | -4.43598  | -3.33088  | -1.44368  |
| 44 | H | 1.22613   | 2.980898  | 0.889657  |
| 45 | H | 0.381668  | 2.776803  | 2.4331    |
| 46 | H | -0.14868  | 4.026082  | 1.287698  |
| 47 | H | -2.62863  | 3.510785  | -0.5094   |

B3LYP Energy = -926.903351

**Table S2.** Cartesian coordinates for the low-energy reoptimized MMFF conformers of **5** calculated at B3LYP/6-31G(d) level of theory in vacuo.

| Compound <b>5</b> Conformer A |      | Standard Orientation (Ångstroms) |           |           |
|-------------------------------|------|----------------------------------|-----------|-----------|
|                               | Type | X                                | Y         | Z         |
| 1                             | C    | -2.525044                        | -2.343825 | -0.304048 |
| 2                             | C    | -3.839207                        | -1.541247 | -0.291768 |
| 3                             | C    | -3.536702                        | -0.074297 | -0.645076 |
| 4                             | C    | -2.435889                        | 0.542965  | 0.231887  |
| 5                             | C    | -1.124398                        | -0.269974 | 0.1488    |
| 6                             | C    | -1.384496                        | -1.747887 | 0.54896   |
| 7                             | C    | -2.18696                         | 2.018805  | -0.106032 |
| 8                             | C    | -1.164282                        | 2.588991  | 0.846472  |
| 9                             | C    | -0.181039                        | 1.8455    | 1.37401   |
| 10                            | C    | 0.041965                         | 0.382508  | 0.971719  |
| 11                            | C    | -0.147279                        | -2.653031 | 0.434109  |
| 12                            | O    | -4.753537                        | -2.095299 | -1.261258 |
| 13                            | C    | 1.338448                         | 0.321689  | 0.19481   |
| 14                            | C    | 2.513397                         | -0.170044 | 0.637061  |
| 15                            | C    | 3.722494                         | -0.164458 | -0.159089 |
| 16                            | C    | 4.915053                         | -0.649168 | 0.251946  |
| 17                            | C    | 6.09368                          | -0.600888 | -0.625384 |
| 18                            | O    | 7.190265                         | -1.142664 | -0.020964 |
| 19                            | O    | 6.142298                         | -0.146814 | -1.756117 |
| 20                            | C    | 0.772671                         | 2.402713  | 2.402085  |
| 21                            | O    | -1.790601                        | 2.097956  | -1.485266 |
| 22                            | C    | -4.58891                         | -1.682629 | 1.036614  |
| 23                            | C    | -1.702285                        | 3.418328  | -1.991239 |
| 24                            | H    | -0.824276                        | -0.268134 | -0.909049 |
| 25                            | H    | 0.17723                          | -0.182061 | 1.90721   |
| 26                            | H    | -2.781026                        | 0.540332  | 1.27591   |
| 27                            | H    | -2.173718                        | -2.407282 | -1.346834 |
| 28                            | H    | -2.732083                        | -3.373574 | 0.014679  |
| 29                            | H    | -4.460179                        | 0.51509   | -0.567161 |
| 30                            | H    | -3.216295                        | -0.022058 | -1.694823 |
| 31                            | H    | -1.702732                        | -1.752716 | 1.603967  |

|    |   |           |           |           |
|----|---|-----------|-----------|-----------|
| 32 | H | -3.132976 | 2.576242  | 0.004996  |
| 33 | H | -1.270904 | 3.628594  | 1.154595  |
| 34 | H | -0.412761 | -3.689292 | 0.677222  |
| 35 | H | 0.657964  | -2.352733 | 1.110754  |
| 36 | H | 0.257926  | -2.642961 | -0.585918 |
| 37 | H | -4.360453 | -2.003648 | -2.144874 |
| 38 | H | 1.292605  | 0.755932  | -0.805681 |
| 39 | H | 2.576457  | -0.603734 | 1.63633   |
| 40 | H | 3.664518  | 0.261476  | -1.160724 |
| 41 | H | 5.047499  | -1.088627 | 1.236873  |
| 42 | H | 7.923886  | -1.075199 | -0.66004  |
| 43 | H | 0.713732  | 1.828149  | 3.33774   |
| 44 | H | 0.541635  | 3.447706  | 2.632396  |
| 45 | H | 1.814529  | 2.348155  | 2.064071  |
| 46 | H | -3.998391 | -1.320355 | 1.883709  |
| 47 | H | -4.834425 | -2.735359 | 1.214256  |
| 48 | H | -5.526255 | -1.116653 | 1.000671  |
| 49 | H | -1.482349 | 3.333268  | -3.05868  |
| 50 | H | -2.654275 | 3.958452  | -1.863068 |
| 51 | H | -0.899597 | 3.991253  | -1.5047   |

B3LYP Energy = -1041.394654.

| Compound <b>5</b> Conformer B |      | Standard Orientation (Ångstroms) |           |           |
|-------------------------------|------|----------------------------------|-----------|-----------|
|                               | Type | X                                | Y         | Z         |
| 1                             | C    | -2.523748                        | -2.337095 | -0.308258 |
| 2                             | C    | -3.834307                        | -1.528663 | -0.303353 |
| 3                             | C    | -3.523085                        | -0.063135 | -0.655028 |
| 4                             | C    | -2.424419                        | 0.549236  | 0.228095  |
| 5                             | C    | -1.116178                        | -0.269638 | 0.152862  |
| 6                             | C    | -1.385492                        | -1.746442 | 0.551445  |
| 7                             | C    | -2.167136                        | 2.023966  | -0.108441 |
| 8                             | C    | -1.146482                        | 2.589802  | 0.848741  |
| 9                             | C    | -0.169748                        | 1.841941  | 1.382245  |
| 10                            | C    | 0.048099                         | 0.377429  | 0.982909  |
| 11                            | C    | -0.151959                        | -2.657466 | 0.444179  |
| 12                            | O    | -4.745656                        | -2.078465 | -1.278051 |
| 13                            | C    | 1.349663                         | 0.307974  | 0.21499   |
| 14                            | C    | 2.518441                         | -0.19019  | 0.665516  |
| 15                            | C    | 3.734675                         | -0.195252 | -0.121911 |
| 16                            | C    | 4.916597                         | -0.689647 | 0.310536  |
| 17                            | C    | 6.153054                         | -0.697785 | -0.48001  |
| 18                            | O    | 6.022991                         | -0.152686 | -1.725056 |
| 19                            | O    | 7.217833                         | -1.144477 | -0.087094 |
| 20                            | C    | 0.7804                           | 2.395154  | 2.415754  |
| 21                            | O    | -1.7639                          | 2.101972  | -1.486061 |
| 22                            | C    | -4.59225                         | -1.666566 | 1.020713  |
| 23                            | C    | -1.670529                        | 3.422161  | -1.991315 |
| 24                            | H    | -0.809652                        | -0.269221 | -0.903211 |

|    |   |           |           |           |
|----|---|-----------|-----------|-----------|
| 25 | H | 0.173634  | -0.186808 | 1.91993   |
| 26 | H | -2.775507 | 0.548375  | 1.27012   |
| 27 | H | -2.166707 | -2.401861 | -1.34905  |
| 28 | H | -2.7372   | -3.365959 | 0.009011  |
| 29 | H | -4.444236 | 0.530545  | -0.582533 |
| 30 | H | -3.196387 | -0.012615 | -1.702941 |
| 31 | H | -1.710157 | -1.749728 | 1.60447   |
| 32 | H | -3.111171 | 2.585576  | -0.002022 |
| 33 | H | -1.249676 | 3.630135  | 1.155587  |
| 34 | H | -0.423953 | -3.692505 | 0.685171  |
| 35 | H | 0.650385  | -2.361462 | 1.126061  |
| 36 | H | 0.259755  | -2.649051 | -0.573271 |
| 37 | H | -4.346783 | -1.989506 | -2.159335 |
| 38 | H | 1.312441  | 0.741083  | -0.786467 |
| 39 | H | 2.572758  | -0.622517 | 1.665844  |
| 40 | H | 3.678688  | 0.228979  | -1.123175 |
| 41 | H | 5.022282  | -1.12307  | 1.301297  |
| 42 | H | 6.90018   | -0.217086 | -2.144818 |
| 43 | H | 1.824341  | 2.332214  | 2.085783  |
| 44 | H | 0.710504  | 1.823427  | 3.352371  |
| 45 | H | 0.555069  | 3.442305  | 2.641862  |
| 46 | H | -4.004951 | -1.307155 | 1.871256  |
| 47 | H | -4.843711 | -2.718128 | 1.196868  |
| 48 | H | -5.526735 | -1.096246 | 0.979444  |
| 49 | H | -2.621554 | 3.9647    | -1.866374 |
| 50 | H | -0.868205 | 3.993105  | -1.501732 |
| 51 | H | -1.447181 | 3.336998  | -3.058091 |

B3LYP Energy = -1041.393827.
